# Supplementary material for: A nickel(ii)-catalyzed enantioselective all-carbon-based inverse-electron-demand Diels–Alder reaction of 2-pyrones with indenes
Source: Royal Society of Chemistry journal article supplement (doi:10.1039/d2qo00493c), 2022-01-01
Supplement: d2qo00493c1.pdf [file d2qo00493c1.pdf]

**Nickel(II)-Catalyzed Enantioselective All-Carbon-Based  
Inverse-Electron-Demand Diels–Alder Reaction of 2-Pyrones  
with Indenes**

Fangqing Zhang,<sup>‡</sup> Bing-Tao Ren,<sup>‡</sup> Yangbin Liu\* and Xiaoming Feng\*

|                                                                         |           |
|-------------------------------------------------------------------------|-----------|
| <b>1. General Information.....</b>                                      | <b>2</b>  |
| <b>2. Preparation of Ligand and Substrates.....</b>                     | <b>3</b>  |
| <b>3. General Procedure for the Catalytic Asymmetric Reaction .....</b> | <b>6</b>  |
| <b>4. References .....</b>                                              | <b>49</b> |
| <b>5. NMR Spectra .....</b>                                             | <b>50</b> |

---

## 1. General Information

All solvents were dried and distilled according to general practice prior to use. All reagents were purchased from commercial sources and used without further purification unless specified otherwise. Solvents for flash column chromatography were technical grade and distilled prior to use. Analytical thin-layer chromatography (TLC) was performed using Huanghai silica gel plates with HSGF 254. Visualization of the developed chromatogram was performed by UV absorbance (254 nm) and appropriate stains. Flash column chromatography was performed using silica gel (300-400 mesh) from Leyan.com with the indicated solvent system according to standard techniques.  $\text{CDCl}_3$  was bought from Leyan.com.  $^1\text{H}$  NMR and  $^{13}\text{C}$  NMR were recorded on Bruker NMR 400 MHz or 500 MHz. Melting points were recorded on a Shanghai Jingke SGWX-4B melting-point Meter and are uncorrected. Chiral HPLC was recorded on a Shimadzu LC-20AD spectrometer using Daicel Chiralcel AD column. HRMS (ESI) analysis was performed by the Analytical Instrumentation Center at Peking University Shenzhen Graduate School and (HRMS) datas were reported with ion mass/charge ( $m/z$ ) ratios as values in atomic mass units.

## 2. Preparation of Ligand and Substrates

### Ligand synthesis

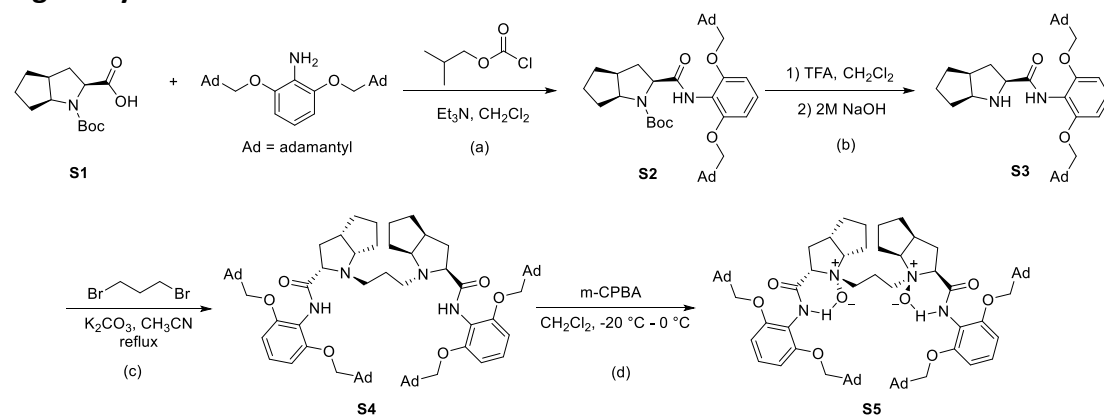

Ligand **L3-Ra(OCH<sub>2</sub>Ad)<sub>2</sub> (S5)** was prepared according to our reported procedure.<sup>1</sup>

(a) To a stirred solution of (tert-butoxycarbonyl)-L-ramipril-2-carboxylic acid (**S1**, 4.5 mmol) in  $\text{CH}_2\text{Cl}_2$  (20 mL) was added with  $\text{Et}_3\text{N}$  (4.5 mmol) and isobutyl carbonochloridate (4.5 mmol) at  $0\text{ }^\circ\text{C}$ . After 30 min, the amine (4 mmol) was added, and the reaction was allowed to warm to ambient temperature for 24 hours. The mixture was washed with 1 M  $\text{KHSO}_4$ , saturated  $\text{NaHCO}_3$ , brine, dried over anhydrous  $\text{Na}_2\text{SO}_4$ , concentrated and washed with hexane.

(b) To the residue (**S2**) in  $\text{CH}_2\text{Cl}_2$  (10 mL) was added with TFA (10 mL) and stirred before the reaction was finished. Then, the solvent was evaporated, and the pH value of the mixture was brought into the range of 8-10 by the addition of 2M NaOH. The aqueous phase was extracted with  $\text{CH}_2\text{Cl}_2$  (5×20 mL). The combined organic phase was washed with brine, dried over anhydrous  $\text{Na}_2\text{SO}_4$  and evaporated in vacuo. The residue purified by silica gel column chromatography to give a white product **S3**.

(c) To a solution of **S3** (1 equiv.) in  $\text{CH}_3\text{CN}$  (12 mL) was added  $\text{K}_2\text{CO}_3$  (5 equiv.) and 1,3-dibromopropane (0.5 equiv.) under stirring. It was kept at  $80\text{ }^\circ\text{C}$ , and monitored by TLC. Then,  $\text{K}_2\text{CO}_3$  was removed by filtration. The residue was concentrated and purified by silica gel column chromatography to give a white product **S4**.

(d) To a solution of **S4** (1 equiv.) in CH<sub>2</sub>Cl<sub>2</sub> (10 mL) was added *m*-CPBA (2.5 equiv.) at -20 °C under stirring. Two hours later, the mixture was concentrated and purified by silica gel column chromatography to give a white powder **S5** (0.59 g, 25% yield for 4 steps).

**L<sub>3</sub>-Ra(OCH<sub>2</sub>Ad)<sub>2</sub> (S5)**

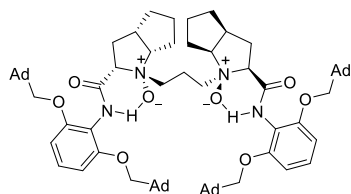

**S5** was obtained as a white solid (0.59 g, 25% yield).

**TLC:** R<sub>f</sub> = 0.3 (ethyl acetate/Petroleum ether 2:1).

**<sup>1</sup>H NMR** (400 MHz, CDCl<sub>3</sub>) δ 12.60 (s, 2H), 7.08 (t, *J* = 8.4 Hz, 2H), 6.50 (d, *J* = 8.4 Hz, 4H), 4.04–3.92 (m, 2H), 3.91–3.73 (m, 4H), 3.50–3.39 (m, 10H), 2.76 (dt, *J* = 14.4, 6.5 Hz, 4H), 2.65–2.44 (m, 6H), 2.02 (d, *J* = 14.8 Hz, 4H), 1.95 (t, *J* = 3.3 Hz, 12H), 1.69 (d, *J* = 12.5 Hz, 16H), 1.62–1.53 (m, 40H).

**<sup>13</sup>C NMR** (101 MHz, CDCl<sub>3</sub>) δ 165.0, 155.2, 127.0, 114.0, 104.3, 83.2, 80.9, 78.5, 66.6, 42.4, 39.4, 37.2, 35.1, 33.8, 32.3, 28.2, 28.0, 27.2, 20.1.

**m.p.** 160–161 °C.

**[α]<sub>D</sub><sup>25</sup>** = +34.8 (*c* = 1.00, CH<sub>2</sub>Cl<sub>2</sub>).

**Table S1. Structures of 2-pyrones**

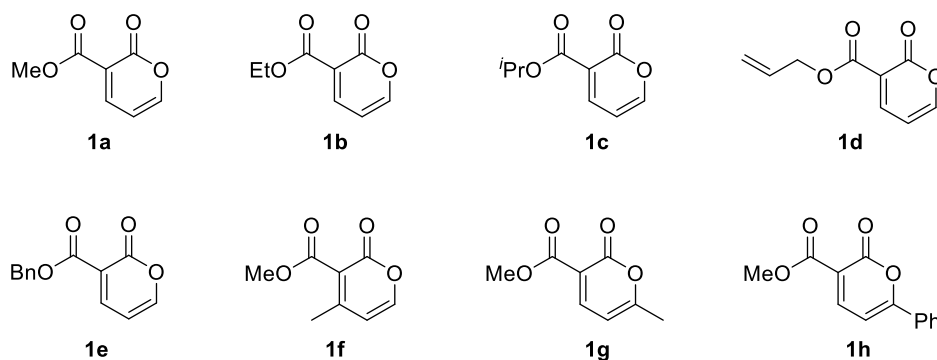

All 2-pyrones were prepared according to the literature.<sup>2</sup>

**Table S2. Structures of indenenes**

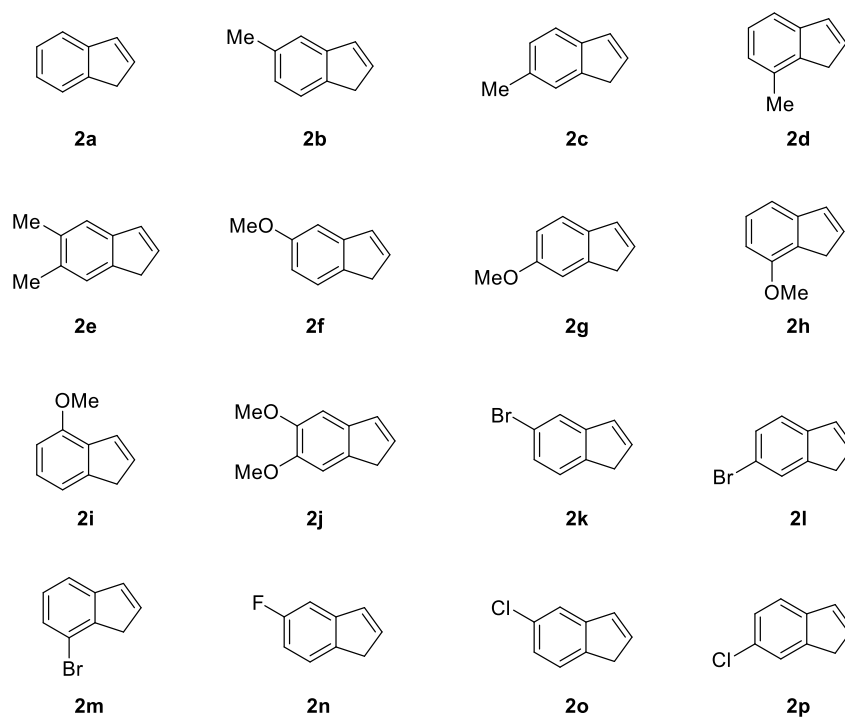

Indenes **2a**, **2o** and **2p** were purchased from Bidepharm and used without further purification. Indenes **2b-2n** were prepared according to the literature.<sup>3</sup>

### 3. General Procedure for the Catalytic Asymmetric Reaction

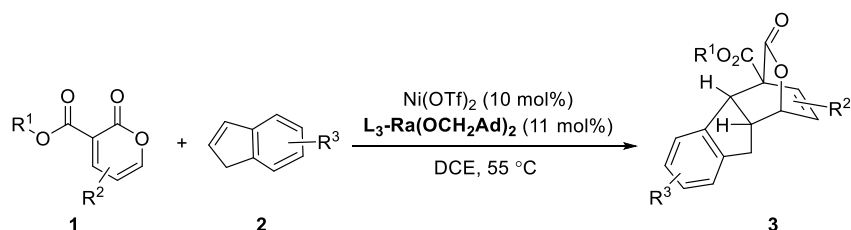

After stirring a mixture of  $\text{Ni}(\text{OTf})_2$  (0.01 mmol, 10 mol%) and  $\text{L}_3\text{-Ra}(\text{OCH}_2\text{Ad})_2$  (0.011 mmol, 11 mol %) in dry DCE (1.0 mL) at 35 °C for 1.0 h under argon atmosphere, 2-pyrones **1** (0.1 mmol) and indenenes **2** (0.2 mmol) were added, and the reaction mixture was stirring at 55 °C. After the disappearance of 2-pyrones (monitored by TLC), the crude product was purified by silica gel flash chromatography (petroleum ether/ethyl acetate 6:1) to afford the desired product **3**.

#### Methyl (4*S*,4*aS*,9*aR*)-10-oxo-1,4*a*,9,9*a*-tetrahydro-4*H*-1,4-(epoxymethano)fluorene-4-carboxylate (**3a**)

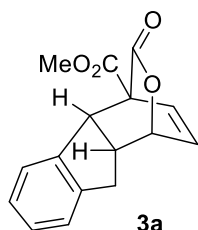

Following the general procedure, reaction time 40 h. Product **3a** was obtained as a white solid (23.1 mg, 85% yield, 87% ee).

**TLC:**  $R_f$  = 0.5 (Petroleum ether/ethyl acetate 2:1).

**$^1\text{H}$  NMR** (500 MHz,  $\text{CDCl}_3$ )  $\delta$  7.10 (d,  $J$  = 7.4 Hz, 1H), 7.07 – 6.98 (m, 2H), 6.92 (d,  $J$  = 7.6 Hz, 1H), 6.47 – 6.40 (m, 1H), 6.31 (dd,  $J$  = 7.9, 5.0 Hz, 1H), 5.21 (td,  $J$  = 4.7, 1.9 Hz, 1H), 4.28 (d,  $J$  = 8.9 Hz, 1H), 3.95 (s, 3H), 3.35 (ddt,  $J$  = 10.4, 8.7, 4.2 Hz, 1H), 3.09 (dd,  $J$  = 17.2, 10.5 Hz, 1H), 2.47 (dd,  $J$  = 17.2, 3.9 Hz, 1H).

**$^{13}\text{C}$  NMR** (126 MHz,  $\text{CDCl}_3$ )  $\delta$  170.2, 168.5, 143.3, 140.0, 132.7, 129.1, 128.4, 127.3, 125.0, 124.2, 77.1, 59.9, 53.2, 48.3, 41.9, 34.0.

**HPLC:** 87% ee, chiral stationary column: AD, mobile phase: hexane/*i*-PrOH = 90/10, 1.0 mL/min, 210 nm, 30 °C,  $t_R$  (major) = 12.7 min,  $t_R$  (minor) = 16.6 min.

**HRMS:**  $m/z$   $[\text{M}+\text{Na}]^+$  calcd for  $\text{C}_{16}\text{H}_{14}\text{NaO}_4$ : 293.0784; found: 293.0785.

**m.p.** 132–133 °C.

**$[\alpha]^{25}_D$**  = +14.5 ( $c$  = 1.00,  $\text{CHCl}_3$ ).

***rac-3a*:**

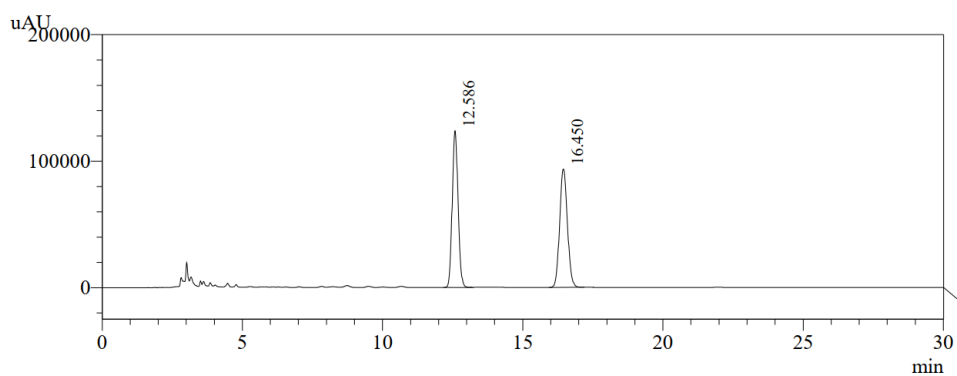

PDA Ch1 210nm

| Peak# | Ret. Time | Area    | Height | Area %  | Height % |
|-------|-----------|---------|--------|---------|----------|
| 1     | 12.586    | 1799891 | 123674 | 49.992  | 56.930   |
| 2     | 16.450    | 1800493 | 93564  | 50.008  | 43.070   |
| Total |           | 3600384 | 217238 | 100.000 | 100.000  |

***cat-3a*:**

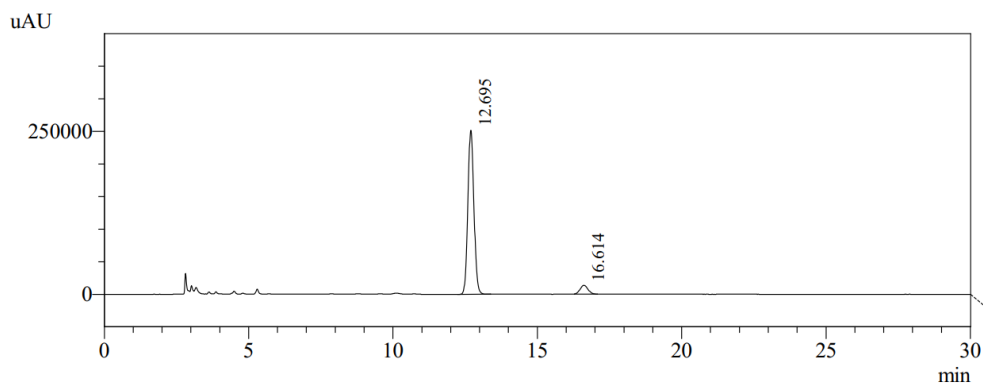

PDA Ch1 210nm

| Peak# | Ret. Time | Area    | Height | Area %  | Height % |
|-------|-----------|---------|--------|---------|----------|
| 1     | 12.695    | 3683298 | 251672 | 93.589  | 94.943   |
| 2     | 16.614    | 252303  | 13406  | 6.411   | 5.057    |
| Total |           | 3935601 | 265078 | 100.000 | 100.000  |

---

### Determination of the relative and absolute configuration of product **3a**:

The Diels–Alder reaction is mechanistically considered a concerted pericyclic reaction. Generally, the predominant product is the kinetically favourable *endo*-cycloadduct. For the racemic version of this IEDDA reaction catalysed by Cu(OTf)<sub>2</sub> or Ni(OTf)<sub>2</sub>, only one diastereomeric isomer of product (dr = 20:1) was detected, which was consistent with the previous work reported by Cai group (*Angew. Chem. Int. Ed.*, 2021, 60, 26610–26615). They also found that Cu(OTf)<sub>2</sub> could promote IEDDA reaction of 2-pyrone and indene smoothly to generate the desired adduct with excellent yield and diastereomeric ratio. The relative configuration of one representative D-A product was determined to be *endo* by X-ray crystallography analysis in Cai's work. Thus, we presumed that the relative configuration of product **3** in our work was also *endo*, which was also confirmed by NOESY NMR of product **3a**.

The absolute configuration of product **3a** was found to be opposite to that reported by the Cai group through the comparison of optical rotation. Cai's method was used to prepare **3a** in 94% ee, and the optical rotation of this sample was measured as  $[\alpha]^{25}_{\text{D}} = -14.02$  ( $c = 1.00$ , CHCl<sub>3</sub>). In our work, a sample of **3a** was prepared in 87% ee and the optical rotation was measured as  $[\alpha]^{25}_{\text{D}} = +14.5$  ( $c = 1.00$ , CHCl<sub>3</sub>).



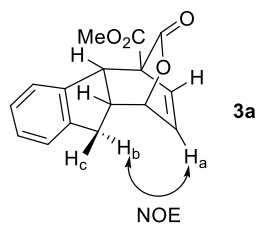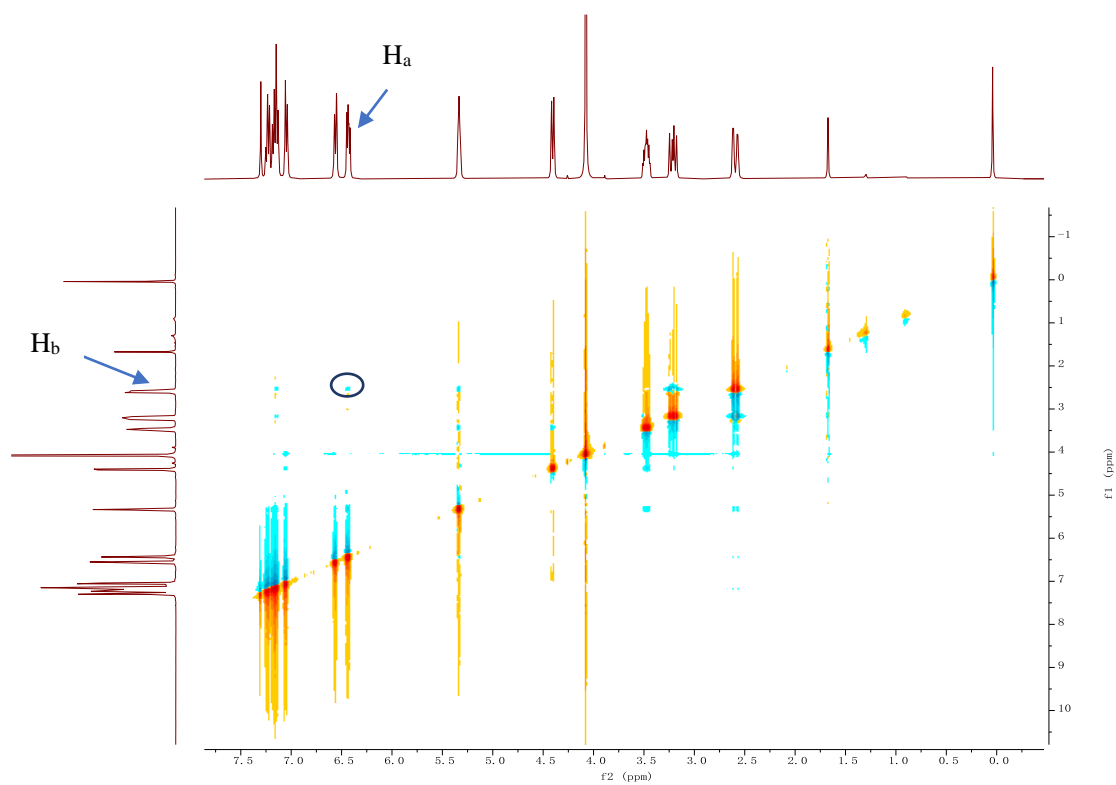

**Ethyl (4*S*,4*aS*,9*aR*)-10-oxo-1,4*a*,9,9*a*-tetrahydro-4*H*-1,4-(epoxymethano)fluorene-4-carboxylate (**3b**)**

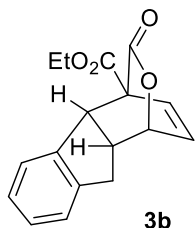

Following the general procedure, reaction time 40 h. Product **3b** was obtained as a white solid (23 mg, 80% yield, 90% *ee*).

**TLC:**  $R_f$  = 0.5 (Petroleum ether/ethyl acetate 2:1).

**$^1\text{H}$  NMR** (400 MHz,  $\text{CDCl}_3$ )  $\delta$  7.23 (t,  $J$  = 7.3 Hz, 1H), 7.14 (dq,  $J$  = 13.9, 7.5 Hz, 3H), 6.56 (d,  $J$  = 7.7 Hz, 1H), 6.42 (dd,  $J$  = 7.9, 5.0 Hz, 1H), 5.32 (dt,  $J$  = 4.7, 2.4 Hz, 1H), 4.61 – 4.48 (m, 2H), 4.42 (d,  $J$  = 8.8 Hz, 1H), 3.47 (ddt,  $J$  = 13.2, 8.7, 4.2 Hz, 1H), 3.21 (dd,  $J$  = 17.2, 10.5 Hz, 1H), 2.59 (dd,  $J$  = 17.2, 3.7 Hz, 1H), 1.48 (t,  $J$  = 7.1 Hz, 3H).

**$^{13}\text{C}$  NMR** (101 MHz,  $\text{CDCl}_3$ )  $\delta$  170.2, 168.0, 143.2, 140.1, 132.8, 128.9, 128.3, 127.2, 124.9, 124.2, 77.0, 62.3, 59.8, 48.1, 41.8, 33.9, 14.2.

**HPLC:** 90% *ee*, chiral stationary column: AD, mobile phase: hexane/EtOH = 95/5, 1.0 mL/min, 210 nm, 30 °C,  $t_R$  (major) = 16.0 min,  $t_R$  (minor) = 31.3 min.

**HRMS:**  $m/z$   $[\text{M}+\text{Na}]^+$  calcd for  $\text{C}_{17}\text{H}_{16}\text{NaO}_4$ : 307.0941; found: 307.0940.

**m.p.** 142–143 °C.

**$[\alpha]^{25}_D$**  = +27.0 ( $c$  = 0.25,  $\text{CH}_2\text{Cl}_2$ ).

**rac-3b:**

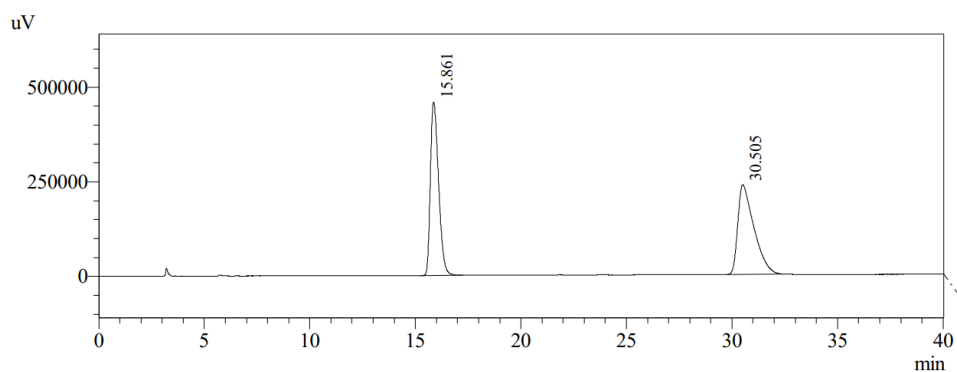

Ch1 210nm 4nm

| Peak# | Ret. Time | Area     | Height | Area %  | Height % |
|-------|-----------|----------|--------|---------|----------|
| 1     | 15.861    | 12357412 | 458053 | 49.434  | 65.850   |
| 2     | 30.505    | 12640625 | 237547 | 50.566  | 34.150   |
| Total |           | 24998038 | 695599 | 100.000 | 100.000  |

**cat-3b:**

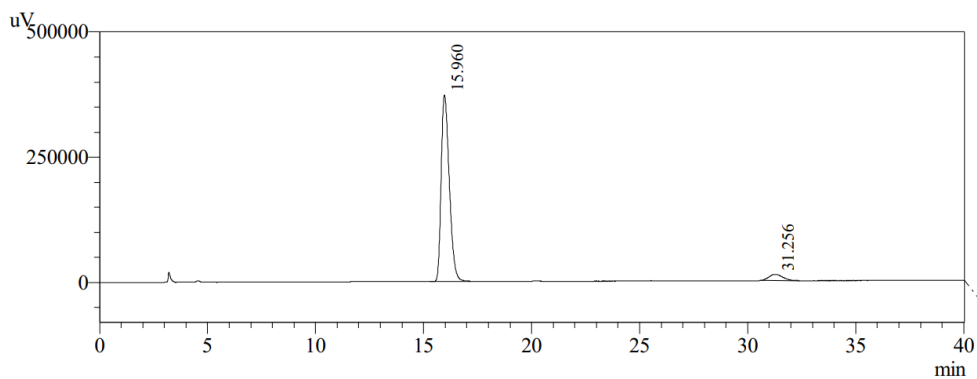

Ch1 210nm 4nm

| Peak# | Ret. Time | Area     | Height | Area %  | Height % |
|-------|-----------|----------|--------|---------|----------|
| 1     | 15.960    | 9744621  | 372166 | 94.632  | 96.775   |
| 2     | 31.256    | 552770   | 12403  | 5.368   | 3.225    |
| Total |           | 10297391 | 384570 | 100.000 | 100.000  |

**Isopropyl (4*S*,4*aS*,9*aR*)-10-oxo-1,4*a*,9,9*a*-tetrahydro-4*H*-1,4-(epoxymethano)fluorene-4-carboxylate (3*c*)**

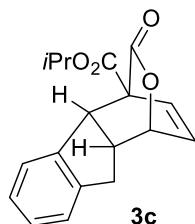

Following the general procedure, reaction time 40 h. Product **3c** was obtained as a white solid (20 mg, 70% yield, 93% *ee*).

**TLC:**  $R_f$  = 0.5 (Petroleum ether/ethyl acetate 2:1).

**$^1\text{H}$  NMR** (400 MHz,  $\text{CDCl}_3$ )  $\delta$  7.22 (dd,  $J$  = 5.0, 2.6 Hz, 1H), 7.20 – 7.07 (m, 3H), 6.55 (d,  $J$  = 7.8 Hz, 1H), 6.47 – 6.35 (m, 1H), 5.48 – 5.37 (m, 1H), 5.30 (td,  $J$  = 4.6, 1.7 Hz, 1H), 4.41 (d,  $J$  = 8.8 Hz, 1H), 3.45 (dd,  $J$  = 9.7, 5.1 Hz, 1H), 3.21 (dd,  $J$  = 17.2, 10.5 Hz, 1H), 2.59 (dd,  $J$  = 17.2, 3.8 Hz, 1H), 1.47 (dd,  $J$  = 10.2, 6.3 Hz, 6H).

**$^{13}\text{C}$  NMR** (101 MHz,  $\text{CDCl}_3$ )  $\delta$  170.2, 167.4, 143.2, 140.2, 133.0, 128.7, 128.2, 127.1, 124.8, 124.3, 76.9, 70.3, 59.7, 48.0, 41.8, 33.9, 21.9, 21.8.

**HPLC:** 93% *ee*, chiral stationary column: AD, mobile phase: hexane/EtOH = 93/7, 1.0 mL/min, 210 nm, 30 °C,  $t_R$  (major) = 9.9 min,  $t_R$  (minor) = 18.6 min.

**HRMS:**  $m/z$   $[\text{M}+\text{Na}]^+$  calcd for  $\text{C}_{18}\text{H}_{18}\text{NaO}_4$ : 321.1097; found: 321.1096.

**m.p.** 111–112 °C.

**$[\alpha]_D^{25}$**  = +32.7 ( $c$  = 0.22,  $\text{CH}_2\text{Cl}_2$ ).

**rac-3c:**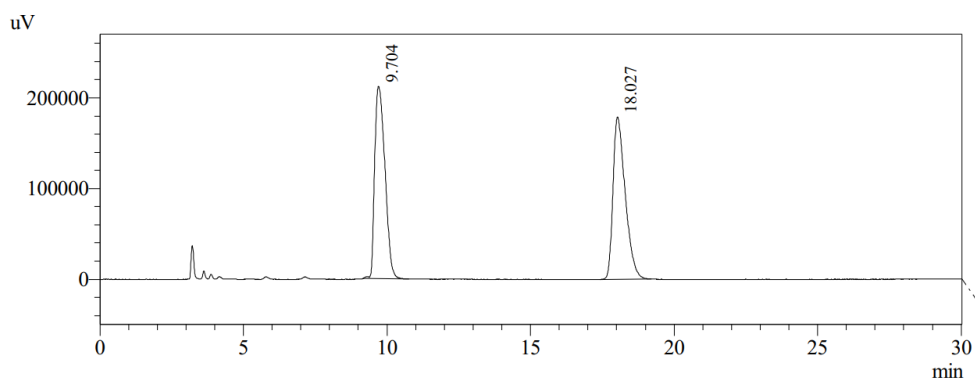

PDA Ch1 210nm 4nm

| Peak# | Ret. Time | Area     | Height | Area %  | Height % |
|-------|-----------|----------|--------|---------|----------|
| 1     | 9.704     | 5270722  | 211997 | 49.922  | 54.196   |
| 2     | 18.027    | 5287160  | 179169 | 50.078  | 45.804   |
| Total |           | 10557882 | 391166 | 100.000 | 100.000  |

**cat-3c:**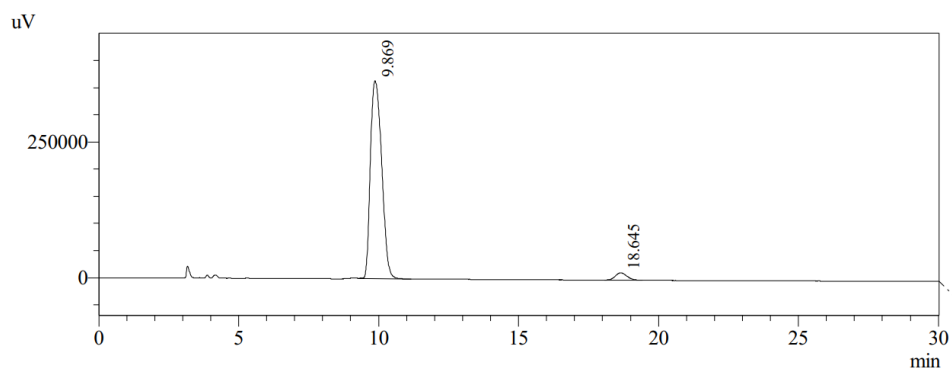

PDA Ch1 210nm 4nm

| Peak# | Ret. Time | Area     | Height | Area %  | Height % |
|-------|-----------|----------|--------|---------|----------|
| 1     | 9.869     | 10205060 | 364038 | 96.318  | 96.420   |
| 2     | 18.645    | 390105   | 13516  | 3.682   | 3.580    |
| Total |           | 10595166 | 377554 | 100.000 | 100.000  |

**Allyl (4a*S*,9a*R*)-10-oxo-1,4a,9,9a-tetrahydro-4*H*-1,4-(epoxymethano)fluorene-4-carboxylate (3d)**

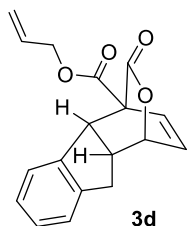

Following the general procedure, reaction time 40 h. Product **3d** was obtained as a white solid (24 mg, 81% yield, 90% *ee*).

**TLC:**  $R_f$  = 0.5 (Petroleum ether/ethyl acetate 2:1).

**$^1\text{H}$  NMR** (400 MHz,  $\text{CDCl}_3$ )  $\delta$  7.25 (d,  $J$  = 7.2 Hz, 1H), 7.17 (dq,  $J$  = 14.8, 7.5 Hz, 3H), 6.60 (d,  $J$  = 7.8 Hz, 1H), 6.46 (dd,  $J$  = 7.9, 5.0 Hz, 1H), 6.21 – 6.05 (m, 1H), 5.62 – 5.48 (m, 1H), 5.46 – 5.37 (m, 1H), 5.36 (td,  $J$  = 4.6, 1.9 Hz, 1H), 5.02 (hept,  $J$  = 7.3, 6.5 Hz, 2H), 4.46 (d,  $J$  = 8.8 Hz, 1H), 3.50 (ddt,  $J$  = 10.2, 8.7, 4.2 Hz, 1H), 3.24 (dd,  $J$  = 17.2, 10.5 Hz, 1H), 2.62 (dd,  $J$  = 17.2, 3.6 Hz, 1H).

**$^{13}\text{C}$  NMR** (101 MHz,  $\text{CDCl}_3$ )  $\delta$  170.1, 167.7, 143.2, 140.0, 132.6, 131.4, 129.0, 128.3, 127.2, 124.9, 124.3, 119.4, 77.0, 66.8, 59.9, 48.2, 41.8, 34.0.

**HPLC:** 90% *ee*, chiral stationary column: AD, mobile phase: hexane/EtOH = 88/12, 1.0 mL/min, 210 nm, 30 °C,  $t_R$  (major) = 11.4 min,  $t_R$  (minor) = 23.7 min.

**HRMS:**  $m/z$   $[\text{M}+\text{Na}]^+$  calcd for  $\text{C}_{18}\text{H}_{16}\text{NaO}_4$ : 319.0941; found: 319.0940.

**m.p.** 64–65 °C.

**$[\alpha]_D^{25}$**  = +33.0 ( $c$  = 0.23,  $\text{CH}_2\text{Cl}_2$ ).

**rac-3d:**

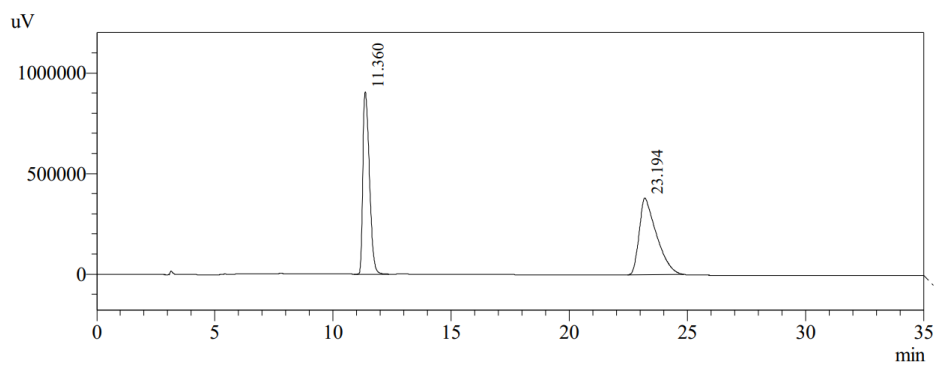

Ch1 210nm 4nm

| Peak# | Ret. Time | Area     | Height  | Area %  | Height % |
|-------|-----------|----------|---------|---------|----------|
| 1     | 11.360    | 17543041 | 905777  | 47.444  | 70.315   |
| 2     | 23.194    | 19433292 | 382399  | 52.556  | 29.685   |
| Total |           | 36976333 | 1288177 | 100.000 | 100.000  |

**cat-3d:**

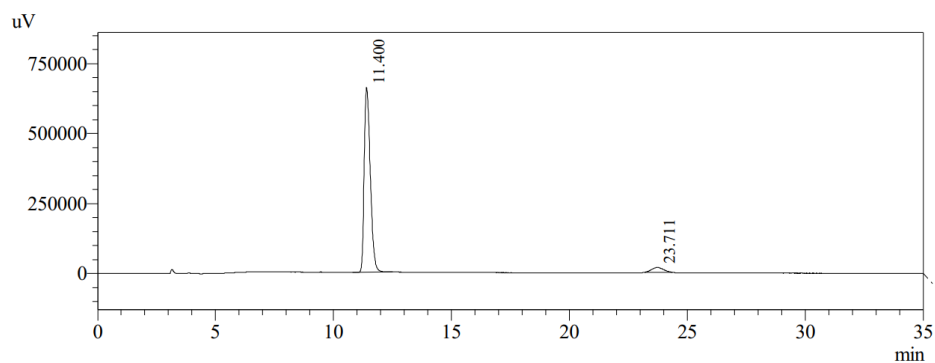

Ch1 210nm 4nm

| Peak# | Ret. Time | Area     | Height | Area %  | Height % |
|-------|-----------|----------|--------|---------|----------|
| 1     | 11.400    | 11843849 | 658947 | 95.031  | 97.419   |
| 2     | 23.711    | 619230   | 17460  | 4.969   | 2.581    |
| Total |           | 12463079 | 676407 | 100.000 | 100.000  |

**Benzyl (4*S*,4*aS*,9*aR*)-10-oxo-1,4*a*,9,9*a*-tetrahydro-4*H*-1,4-(epoxymethano) fluorene-4-carboxylate (**3e**)**

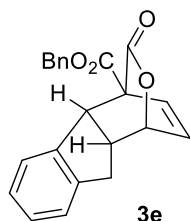

Following the general procedure, reaction time 40 h. Product **3e** was obtained as a white solid (30 mg, 83% yield, 89% *ee*).

**TLC:**  $R_f$  = 0.5 (Petroleum ether/ethyl acetate 2:1).

**$^1\text{H}$  NMR** (400 MHz,  $\text{CDCl}_3$ )  $\delta$  7.54 – 7.45 (m, 2H), 7.39 (q,  $J$  = 7.5, 6.8 Hz, 3H), 7.14 (t,  $J$  = 7.4 Hz, 1H), 7.06 (d,  $J$  = 7.5 Hz, 1H), 6.97 (t,  $J$  = 7.5 Hz, 1H), 6.80 (d,  $J$  = 7.7 Hz, 1H), 6.53 (d,  $J$  = 7.3 Hz, 1H), 6.37 (dd,  $J$  = 7.9, 4.9 Hz, 1H), 5.48 (s, 2H), 5.27 (td,  $J$  = 4.7, 1.9 Hz, 1H), 4.38 (d,  $J$  = 8.8 Hz, 1H), 3.48 – 3.34 (m, 1H), 3.15 (dd,  $J$  = 17.2, 10.5 Hz, 1H), 2.53 (dd,  $J$  = 17.2, 3.8 Hz, 1H).

**$^{13}\text{C}$  NMR** (101 MHz,  $\text{CDCl}_3$ )  $\delta$  170.0, 167.8, 143.1, 139.9, 135.1, 132.7, 128.9, 128.8, 128.7, 128.6, 128.2, 127.2, 124.8, 124.2, 77.0, 68.0, 59.8, 48.3, 41.7, 33.9.

**HPLC:** 89% *ee*, chiral stationary column: AD, mobile phase: hexane/EtOH = 88/12, 1.0 mL/min, 210 nm, 30 °C,  $t_R$  (major) = 19.8 min,  $t_R$  (minor) = 35.9 min.

**HRMS:**  $m/z$   $[\text{M}+\text{Na}]^+$  calcd for  $\text{C}_{22}\text{H}_{18}\text{NaO}_4$ : 369.1097; found: 369.1096.

**m.p.** 56–57 °C.

**$[\alpha]_D^{25}$**  = +44.5 ( $c$  = 0.21,  $\text{CH}_2\text{Cl}_2$ ).



**rac-3e:**

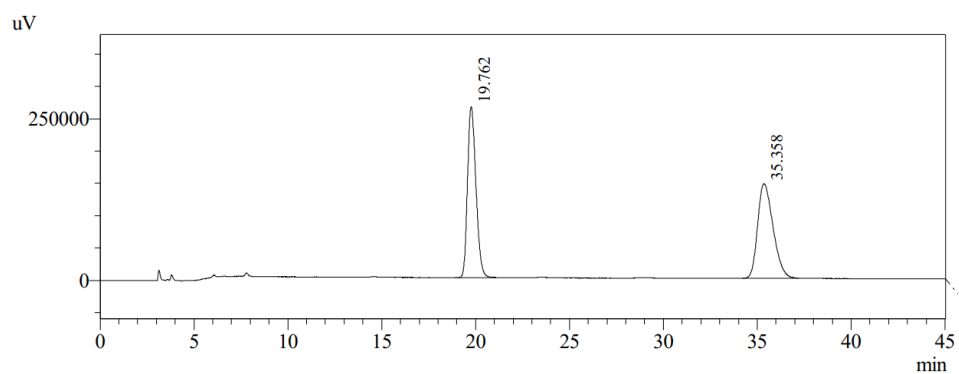

Ch1 210nm 4nm

| Peak# | Ret. Time | Area     | Height | Area %  | Height % |
|-------|-----------|----------|--------|---------|----------|
| 1     | 19.762    | 8256037  | 264205 | 49.689  | 64.341   |
| 2     | 35.358    | 8359324  | 146426 | 50.311  | 35.659   |
| Total |           | 16615362 | 410631 | 100.000 | 100.000  |

**cat-3e:**

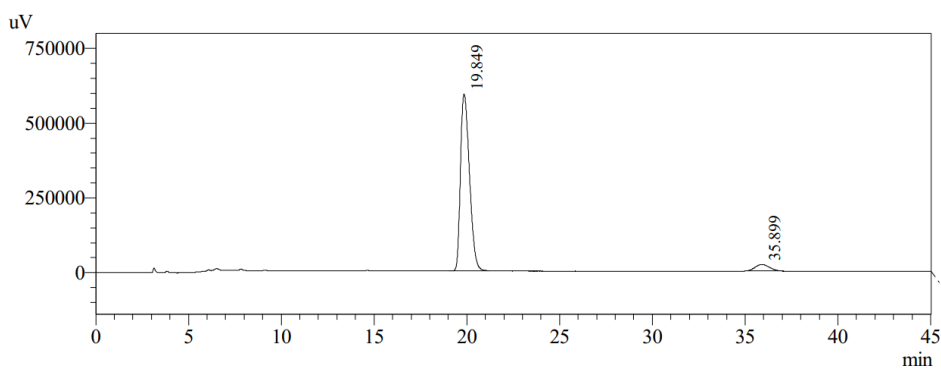

Ch1 210nm 4nm

| Peak# | Ret. Time | Area     | Height | Area %  | Height % |
|-------|-----------|----------|--------|---------|----------|
| 1     | 19.849    | 19972032 | 592056 | 94.637  | 96.504   |
| 2     | 35.899    | 1131860  | 21446  | 5.363   | 3.496    |
| Total |           | 21103892 | 613502 | 100.000 | 100.000  |

**Methyl (4*R*,4*aS*,9*aR*)-3-methyl-10-oxo-1,4*a*,9,9*a*-tetrahydro-4*H*-1,4-(epoxymethano)fluorene-4-carboxylate (3f)**

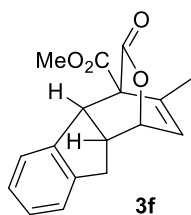

Following the general procedure, reaction time 60 h. Product **3f** was obtained as a white solid (15 mg, 53% yield, 88% *ee*).

**TLC:**  $R_f$  = 0.5 (Petroleum ether /ethyl acetate 2:1).

**$^1\text{H}$  NMR** (400 MHz,  $\text{CDCl}_3$ )  $\delta$  7.25 – 7.03 (m, 4H), 5.97 (dq,  $J$  = 5.3, 1.7 Hz, 1H), 5.09 (dd,  $J$  = 5.1, 3.9 Hz, 1H), 4.45 (d,  $J$  = 8.4 Hz, 1H), 4.01 (s, 3H), 3.29 (ddt,  $J$  = 10.4, 8.0, 3.7 Hz, 1H), 3.15 (dd,  $J$  = 17.1, 10.4 Hz, 1H), 2.52 (dd,  $J$  = 17.1, 3.5 Hz, 1H), 1.56 (d,  $J$  = 1.7 Hz, 3H).

**$^{13}\text{C}$  NMR** (101 MHz,  $\text{CDCl}_3$ )  $\delta$  170.7, 168.5, 143.4, 142.3, 139.9, 128.2, 126.9, 124.9, 124.8, 123.2, 76.3, 63.4, 52.8, 48.1, 41.8, 34.1, 20.2.

**HPLC:** 88% *ee*, chiral stationary column: AD, mobile phase: hexane/EtOH = 90/10, 1.0 mL/min, 210 nm, 30 °C,  $t_R$  (major) = 7.9 min,  $t_R$  (minor) = 10.1 min.

**HRMS:**  $m/z$   $[\text{M}+\text{Na}]^+$  calcd for  $\text{C}_{17}\text{H}_{16}\text{NaO}_4$ : 307.0941; found: 307.0941.

**m.p.** 119–120 °C.

**$[\alpha]_D^{25}$**  = +4.6 ( $c$  = 0.35,  $\text{CHCl}_3$ ).

**rac-3f:**

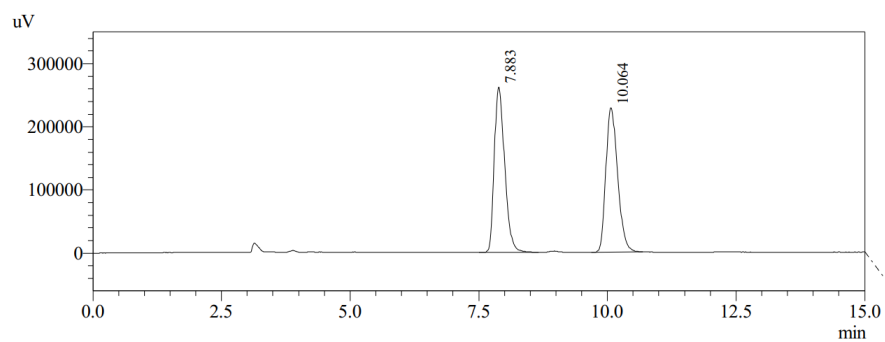

Ch1 210nm 4nm

| Peak# | Ret. Time | Area    | Height | Area %  | Height % |
|-------|-----------|---------|--------|---------|----------|
| 1     | 7.883     | 3682499 | 261054 | 50.195  | 53.278   |
| 2     | 10.064    | 3653889 | 228927 | 49.805  | 46.722   |
| Total |           | 7336388 | 489982 | 100.000 | 100.000  |

**cat-3f:**

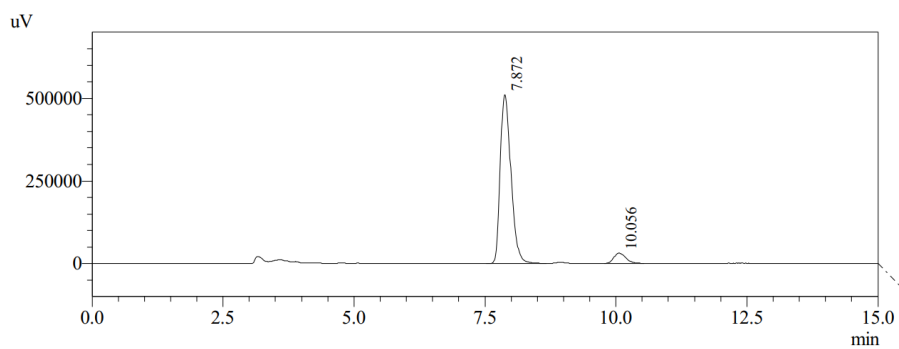

Ch1 210nm 4nm

| Peak# | Ret. Time | Area    | Height | Area %  | Height % |
|-------|-----------|---------|--------|---------|----------|
| 1     | 7.872     | 7305908 | 509828 | 93.803  | 94.272   |
| 2     | 10.056    | 482684  | 30975  | 6.197   | 5.728    |
| Total |           | 7788592 | 540803 | 100.000 | 100.000  |

**Methyl (4*S*,4*aS*,9*aR*)-6-methyl-10-oxo-1,4*a*,9,9*a*-tetrahydro-4*H*-1,4-(epoxymethano)fluorene-4-carboxylate (**3i**)**

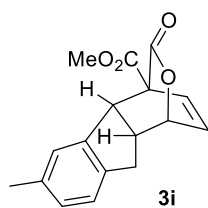

Following the general procedure, reaction time 60 h. Product **3i** was obtained as a white solid (28 mg, 98% yield, 86% *ee*).

**TLC:**  $R_f$  = 0.5 (Petroleum ether/ethyl acetate 2:1).

**$^1\text{H}$  NMR** (500 MHz,  $\text{CDCl}_3$ )  $\delta$  6.91 (q,  $J$  = 7.8 Hz, 2H), 6.71 (s, 1H), 6.49 – 6.41 (m, 1H), 6.30 (dd,  $J$  = 7.9, 5.0 Hz, 1H), 5.20 (td,  $J$  = 4.7, 1.9 Hz, 1H), 4.22 (d,  $J$  = 8.8 Hz, 1H), 3.95 (s, 3H), 3.33 (ddd,  $J$  = 8.9, 6.1, 4.5 Hz, 1H), 3.08 – 2.95 (m, 1H), 2.41 (dd,  $J$  = 17.0, 3.8 Hz, 1H), 2.19 (s, 3H).

**$^{13}\text{C}$  NMR** (101 MHz,  $\text{CDCl}_3$ )  $\delta$  170.2, 168.5, 140.2, 140.0, 136.8, 132.5, 129.3, 129.0, 124.6, 77.1, 59.8, 53.1, 48.1, 42.1, 33.5, 21.5.

**HPLC:** 86% *ee*, chiral stationary column: AD, mobile phase: hexane/EtOH = 95/5, 1.0 mL/min, 210 nm, 30 °C,  $t_R$  (major) = 18.4 min,  $t_R$  (minor) = 24.8 min.

**HRMS:**  $m/z$   $[\text{M}+\text{Na}]^+$  calcd for  $\text{C}_{17}\text{H}_{16}\text{NaO}_4$ : 307.0941; found: 307.0941.

**m.p.** 128–129 °C.

**$[\alpha]^{25}_D$**  = –6.9 ( $c$  = 0.23,  $\text{CH}_2\text{Cl}_2$ ).

***rac-3i:***

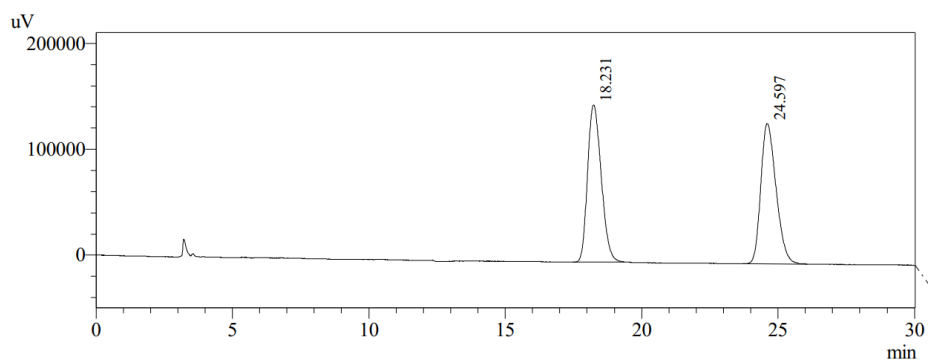

PDA Ch1 210nm 4nm

| Peak# | Ret. Time | Area     | Height | Area %  | Height % |
|-------|-----------|----------|--------|---------|----------|
| 1     | 18.231    | 5164390  | 148272 | 50.002  | 52.787   |
| 2     | 24.597    | 5164045  | 132614 | 49.998  | 47.213   |
| Total |           | 10328434 | 280886 | 100.000 | 100.000  |

***cat-3i:***

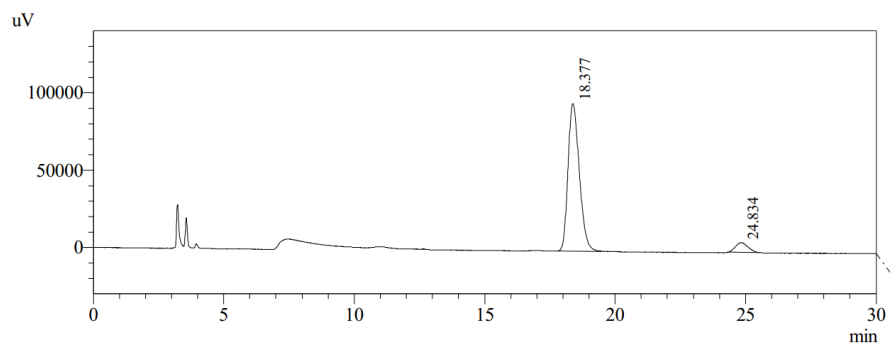

PDA Ch1 210nm 4nm

| Peak# | Ret. Time | Area    | Height | Area %  | Height % |
|-------|-----------|---------|--------|---------|----------|
| 1     | 18.377    | 2881400 | 95385  | 93.189  | 93.780   |
| 2     | 24.834    | 210607  | 6326   | 6.811   | 6.220    |
| Total |           | 3092007 | 101711 | 100.000 | 100.000  |

**Methyl (4*S*,4*aS*,9*aR*)-7-methyl-10-oxo-1,4*a*,9,9*a*-tetrahydro-4*H*-1,4-  
(epoxymethano)fluorene-4-carboxylate (**3j**)**

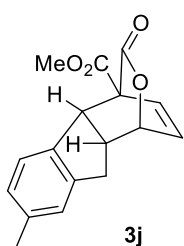

Following the general procedure, the reaction was stirred at 35 °C for 40 h. Product **3j** was obtained as a white solid (26 mg, 91% yield, 89% *ee*).

**TLC:**  $R_f$  = 0.5 (Petroleum ether/ethyl acetate 2:1).

**$^1\text{H}$  NMR** (400 MHz,  $\text{CDCl}_3$ )  $\delta$  7.00 – 6.81 (m, 3H), 6.60 – 6.46 (m, 1H), 6.38 (dd,  $J$  = 7.9, 4.9 Hz, 1H), 5.28 (td,  $J$  = 4.6, 1.9 Hz, 1H), 4.31 (d,  $J$  = 8.8 Hz, 1H), 4.02 (s, 3H), 3.42 (ddt,  $J$  = 10.2, 8.6, 4.2 Hz, 1H), 3.12 (dd,  $J$  = 17.2, 10.5 Hz, 1H), 2.50 (dd,  $J$  = 17.2, 4.1 Hz, 1H), 2.28 (s, 3H).

**$^{13}\text{C}$  NMR** (101 MHz,  $\text{CDCl}_3$ )  $\delta$  170.2, 168.5, 143.3, 138.2, 136.9, 132.6, 128.9, 128.2, 125.5, 123.8, 77.0, 59.8, 53.1, 47.9, 42.0, 33.8, 21.3.

**HPLC:** 89% *ee*, chiral stationary column: AD, mobile phase: hexane/EtOH = 95/5, 1.0 mL/min, 210 nm, 30 °C,  $t_R$  (major) = 19.2 min,  $t_R$  (minor) = 32.7 min.

**HRMS:**  $m/z$   $[\text{M}+\text{Na}]^+$  calcd for  $\text{C}_{17}\text{H}_{16}\text{NaO}_4$ : 307.0941; found: 307.0941.

**m.p.** 117–118 °C.

**$[\alpha]^{25}_D$**  = +18.3 ( $c$  = 0.23,  $\text{CH}_2\text{Cl}_2$ ).

**rac-3j:**

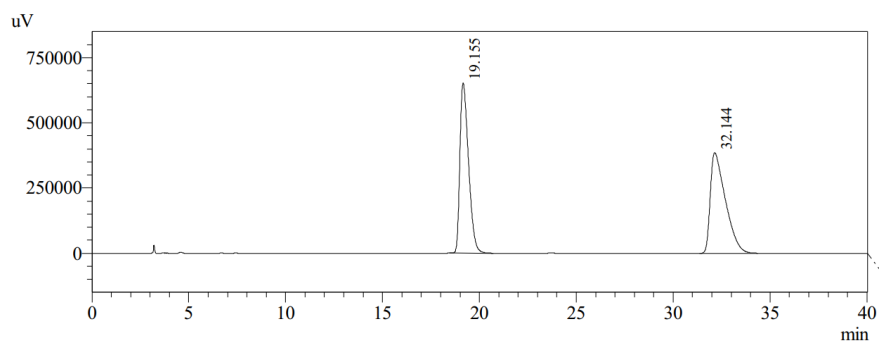

Ch1 210nm 4nm

| Peak# | Ret. Time | Area     | Height  | Area %  | Height % |
|-------|-----------|----------|---------|---------|----------|
| 1     | 19.155    | 20237006 | 652125  | 49.163  | 62.793   |
| 2     | 32.144    | 20926161 | 386401  | 50.837  | 37.207   |
| Total |           | 41163167 | 1038526 | 100.000 | 100.000  |

**cat-3j:**

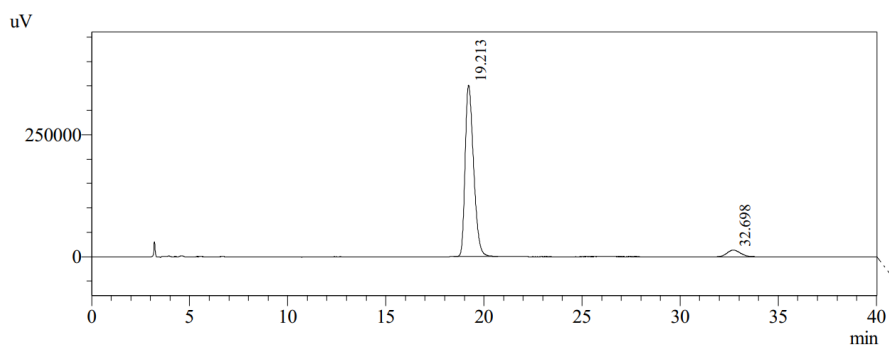

Ch1 210nm 4nm

| Peak# | Ret. Time | Area     | Height | Area %  | Height % |
|-------|-----------|----------|--------|---------|----------|
| 1     | 19.213    | 10516786 | 351050 | 94.327  | 96.265   |
| 2     | 32.698    | 632542   | 13622  | 5.673   | 3.735    |
| Total |           | 11149328 | 364672 | 100.000 | 100.000  |

**Methyl (4*S*,4*aS*,9*aR*)-8-methyl-10-oxo-1,4*a*,9,9*a*-tetrahydro-4*H*-1,4-  
(epoxymethano)fluorene-4-carboxylate (**3k**)**

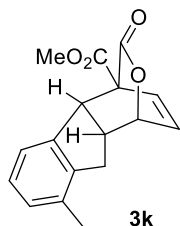

Following the general procedure, reaction time 40 h. Product **3k** was obtained as a white solid (27 mg, 94% yield, 87% *ee*).

**TLC:**  $R_f$  = 0.5 (Petroleum ether /ethyl acetate 2:1).

**$^1\text{H}$  NMR** (400 MHz,  $\text{CDCl}_3$ )  $\delta$  7.10 – 6.97 (m, 2H), 6.83 (d,  $J$  = 7.5 Hz, 1H), 6.53 (dt,  $J$  = 7.9, 1.5 Hz, 1H), 6.38 (dd,  $J$  = 8.0, 4.9 Hz, 1H), 5.30 (td,  $J$  = 4.6, 1.9 Hz, 1H), 4.35 (d,  $J$  = 8.9 Hz, 1H), 4.03 (s, 3H), 3.43 (ddt,  $J$  = 10.4, 8.7, 4.2 Hz, 1H), 3.04 (dd,  $J$  = 17.2, 10.4 Hz, 1H), 2.43 (dd,  $J$  = 17.3, 4.1 Hz, 1H), 2.16 (s, 3H).

**$^{13}\text{C}$  NMR** (101 MHz,  $\text{CDCl}_3$ )  $\delta$  170.1, 168.4, 142.2, 139.6, 134.4, 132.7, 129.0, 129.0, 127.6, 121.3, 77.0, 59.8, 53.1, 48.5, 41.6, 33.0, 19.1.

**HPLC:** 87% *ee*, chiral stationary column: AD, mobile phase: hexane/EtOH = 95/5, 1.0 mL/min, 210 nm, 30 °C,  $t_R$  (major) = 17.2 min,  $t_R$  (minor) = 28.2 min.

**HRMS:**  $m/z$   $[\text{M}+\text{Na}]^+$  calcd for  $\text{C}_{17}\text{H}_{16}\text{NaO}_4$ : 307.0941; found: 307.0942.

**m.p.** 138–139 °C.

**$[\alpha]_D^{25}$**  = +21.4 ( $c$  = 0.24,  $\text{CH}_2\text{Cl}_2$ ).



**rac-3k:**

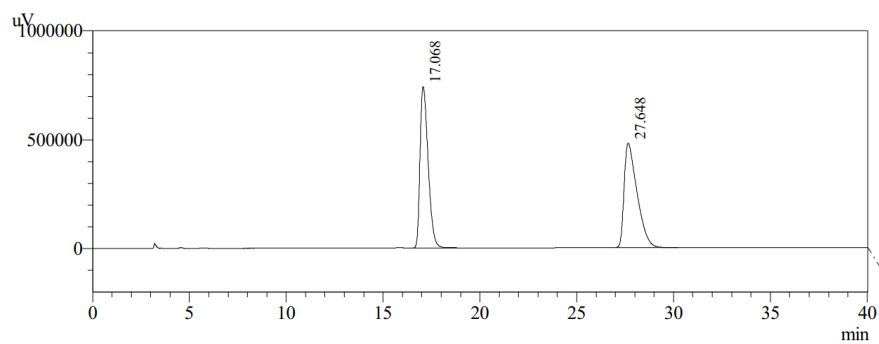

PDA Ch1 210nm 4nm

| Peak# | Ret. Time | Area     | Height  | Area %  | Height % |
|-------|-----------|----------|---------|---------|----------|
| 1     | 17.068    | 21563992 | 740635  | 49.419  | 60.724   |
| 2     | 27.648    | 22070660 | 479046  | 50.581  | 39.276   |
| Total |           | 43634652 | 1219680 | 100.000 | 100.000  |

**cat-3k:**

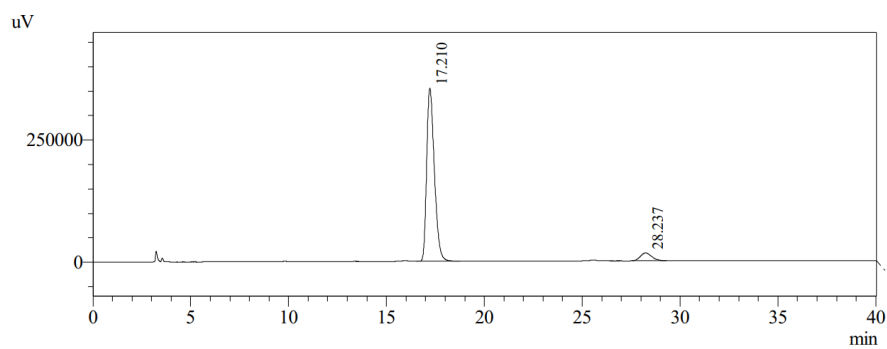

PDA Ch1 210nm 4nm

| Peak# | Ret. Time | Area     | Height | Area %  | Height % |
|-------|-----------|----------|--------|---------|----------|
| 1     | 17.210    | 9676483  | 354670 | 93.676  | 95.638   |
| 2     | 28.237    | 653221   | 16175  | 6.324   | 4.362    |
| Total |           | 10329704 | 370844 | 100.000 | 100.000  |

**Methyl (4*S*,4*aS*,9*aR*)-6,7-dimethyl-10-oxo-1,4*a*,9,9*a*-tetrahydro-4*H*-1,4-(epoxymethano)fluorene-4-carboxylate (**3I**)**

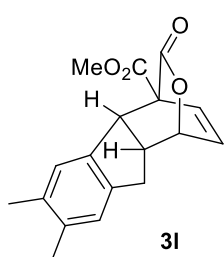

Following the general procedure, the reaction was stirred at 35 °C for 72 h. Product **3I** was obtained as a white solid (28 mg, 93% yield, 85% *ee*).

**TLC:**  $R_f$  = 0.5 (Petroleum ether /ethyl acetate 2:1).

**$^1\text{H}$  NMR** (400 MHz,  $\text{CDCl}_3$ )  $\delta$  6.91 (s, 1H), 6.79 (s, 1H), 6.58 (d,  $J$  = 7.8 Hz, 1H), 6.42 (dd,  $J$  = 7.9, 5.0 Hz, 1H), 5.31 (td,  $J$  = 4.6, 1.7 Hz, 1H), 4.32 (d,  $J$  = 8.8 Hz, 1H), 4.08 (s, 3H), 3.44 (tt,  $J$  = 8.7, 4.2 Hz, 1H), 3.13 (dd,  $J$  = 17.0, 10.5 Hz, 1H), 2.51 (dd,  $J$  = 17.0, 3.7 Hz, 1H), 2.22 (d,  $J$  = 4.3 Hz, 6H).

**$^{13}\text{C}$  NMR** (101 MHz,  $\text{CDCl}_3$ )  $\delta$  170.2, 168.5, 140.7, 137.4, 137.0, 135.6, 132.6, 128.9, 125.8, 124.9, 77.1, 59.8, 53.0, 48.0, 42.1, 33.6, 20.1, 19.9.

**HPLC:** 85% *ee*, chiral stationary column: AD, mobile phase: hexane/EtOH = 95/5, 1.0 mL/min, 210 nm, 30 °C,  $t_R$  (major) = 16.3 min,  $t_R$  (minor) = 29.5 min.

**HRMS:**  $m/z$   $[\text{M}+\text{Na}]^+$  calcd for  $\text{C}_{18}\text{H}_{18}\text{NaO}_4$ : 321.1097; found: 321.1098.

**m.p.** 134–135 °C.

**$[\alpha]_D^{25}$**  = −4.3 ( $c$  = 0.23,  $\text{CH}_2\text{Cl}_2$ ).

**rac-3l:**

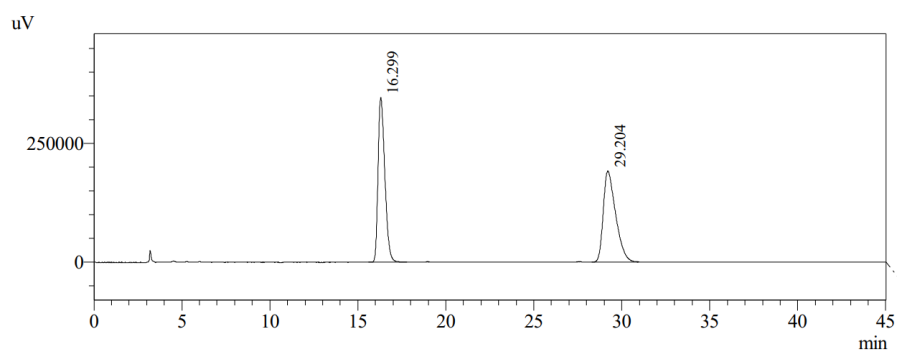

Ch1 210nm 4nm

| Peak# | Ret. Time | Area     | Height | Area %  | Height % |
|-------|-----------|----------|--------|---------|----------|
| 1     | 16.299    | 9269150  | 346323 | 49.881  | 64.410   |
| 2     | 29.204    | 9313548  | 191363 | 50.119  | 35.590   |
| Total |           | 18582699 | 537686 | 100.000 | 100.000  |

**cat-3l:**

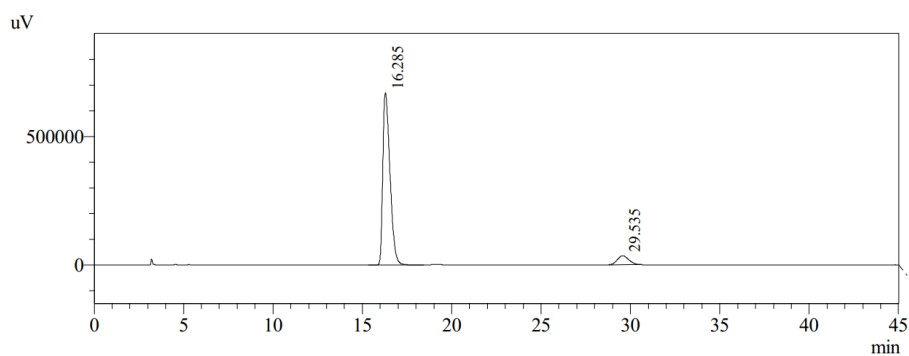

Ch1 210nm 4nm

| Peak# | Ret. Time | Area     | Height | Area %  | Height % |
|-------|-----------|----------|--------|---------|----------|
| 1     | 16.285    | 18652395 | 668455 | 92.298  | 95.003   |
| 2     | 29.535    | 1556498  | 35161  | 7.702   | 4.997    |
| Total |           | 20208893 | 703616 | 100.000 | 100.000  |

**Methyl (4*S*,4*aS*,9*aR*)-6-methoxy-10-oxo-1,4*a*,9,9*a*-tetrahydro-4*H*-1,4-(epoxymethano)fluorene-4-carboxylate (**3m**)**

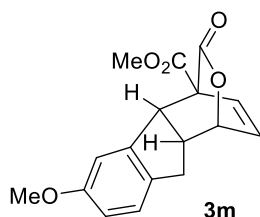

Following the general procedure, the reaction was stirred at 35 °C for 40 h. Product **3m** was obtained as a white solid (22 mg, 73% yield, 84% *ee*).

**TLC:**  $R_f$  = 0.4 (Petroleum ether/ethyl acetate 2:1).

**$^1\text{H}$  NMR** (400 MHz,  $\text{CDCl}_3$ )  $\delta$  7.02 (d,  $J$  = 8.4 Hz, 1H), 6.78 (dd,  $J$  = 8.4, 2.3 Hz, 1H), 6.61 – 6.53 (m, 2H), 6.43 (dd,  $J$  = 7.9, 4.9 Hz, 1H), 5.31 (td,  $J$  = 4.7, 1.9 Hz, 1H), 4.34 (d,  $J$  = 8.8 Hz, 1H), 4.06 (s, 3H), 3.76 (s, 3H), 3.53 – 3.40 (m, 1H), 3.12 (dd,  $J$  = 16.7, 10.5 Hz, 1H), 2.50 (dd,  $J$  = 16.8, 3.9 Hz, 1H).

**$^{13}\text{C}$  NMR** (101 MHz,  $\text{CDCl}_3$ )  $\delta$  170.1, 168.5, 159.1, 141.3, 135.0, 132.4, 129.1, 125.4, 114.6, 109.1, 77.0, 59.7, 55.3, 53.1, 48.2, 42.4, 33.1.

**HPLC:** 84% *ee*, chiral stationary column: AD, mobile phase: hexane/EtOH = 95/5, 1.0 mL/min, 210 nm, 30 °C,  $t_R$  (major) = 29.1 min,  $t_R$  (minor) = 43.9 min.

**HRMS:**  $m/z$   $[\text{M}+\text{Na}]^+$  calcd for  $\text{C}_{17}\text{H}_{16}\text{NaO}_5$ : 323.0890; found: 323.0889.

**m.p.** 115–116 °C.

**$[\alpha]^{25}_D$**  = +1.5 ( $c$  = 0.23,  $\text{CH}_2\text{Cl}_2$ ).

**rac-3m:**

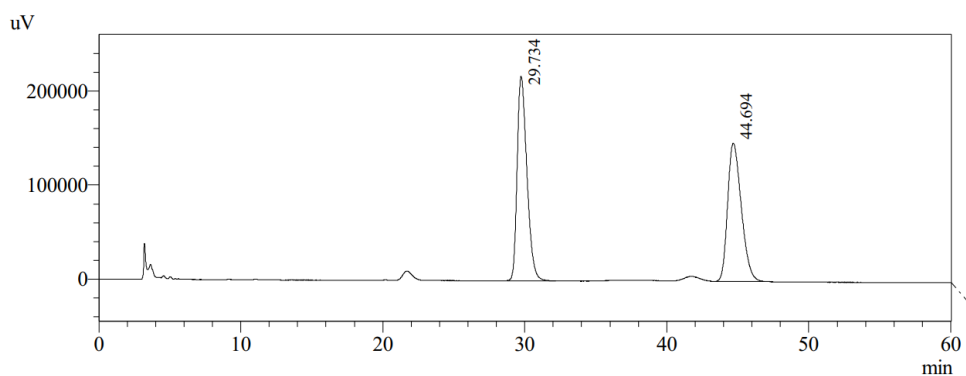

PDA Ch1 210nm 4nm

| Peak# | Ret. Time | Area     | Height | Area %  | Height % |
|-------|-----------|----------|--------|---------|----------|
| 1     | 29.734    | 10355700 | 217435 | 51.290  | 59.662   |
| 2     | 44.694    | 9834816  | 147008 | 48.710  | 40.338   |
| Total |           | 20190516 | 364443 | 100.000 | 100.000  |

**cat-3m:**

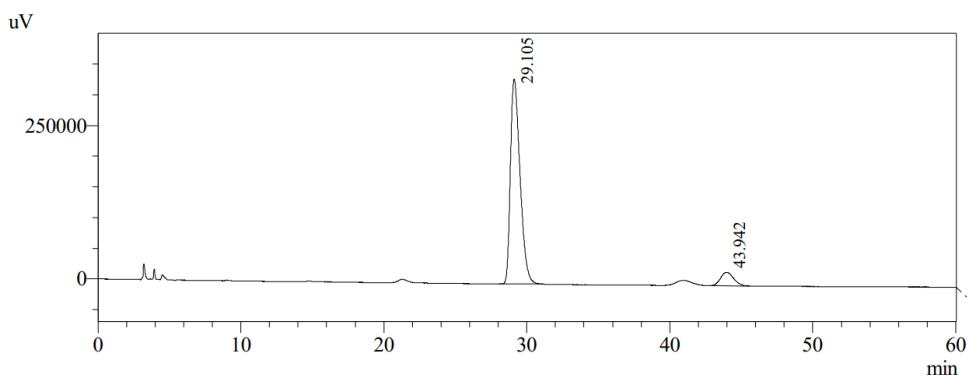

PDA Ch1 210nm 4nm

| Peak# | Ret. Time | Area     | Height | Area %  | Height % |
|-------|-----------|----------|--------|---------|----------|
| 1     | 29.105    | 15630696 | 333995 | 91.860  | 93.827   |
| 2     | 43.942    | 1385052  | 21976  | 8.140   | 6.173    |
| Total |           | 17015749 | 355971 | 100.000 | 100.000  |

**Methyl (4*S*,4*aS*,9*aR*)-7-methoxy-10-oxo-1,4*a*,9,9*a*-tetrahydro-4*H*-1,4-(epoxymethano)fluorene-4-carboxylate (3n)**

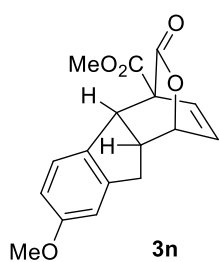

Following the general procedure, the reaction was stirred at 35 °C for 40 h. Product **3n** was obtained as a white solid (26 mg, 86% yield, 87% ee).

**TLC:**  $R_f$  = 0.4 (Petroleum ether/ethyl acetate 2:1).

**$^1\text{H}$  NMR** (400 MHz,  $\text{CDCl}_3$ )  $\delta$  6.93 (d,  $J$  = 8.5 Hz, 1H), 6.75 – 6.67 (m, 1H), 6.64 (s, 1H), 6.56 (d,  $J$  = 7.9 Hz, 1H), 6.42 (dd,  $J$  = 7.7, 5.0 Hz, 1H), 5.31 (t,  $J$  = 4.5 Hz, 1H), 4.31 (d,  $J$  = 8.8 Hz, 1H), 4.05 (s, 3H), 3.78 (s, 3H), 3.46 (dq,  $J$  = 8.9, 4.4 Hz, 1H), 3.16 (dd,  $J$  = 17.3, 10.5 Hz, 1H), 2.54 (dd,  $J$  = 17.3, 3.7 Hz, 1H).

**$^{13}\text{C}$  NMR** (101 MHz,  $\text{CDCl}_3$ )  $\delta$  170.1, 168.5, 160.0, 144.8, 132.6, 131.9, 128.8, 124.7, 113.6, 109.5, 77.0, 59.9, 55.3, 53.1, 47.5, 42.3, 34.0.

**HPLC:** 87% ee, chiral stationary column: AD, mobile phase: hexane/EtOH = 88/12, 1.0 mL/min, 210 nm, 30 °C,  $t_R$  (major) = 16.5 min,  $t_R$  (minor) = 23.7 min.

**HRMS:**  $m/z$   $[\text{M}+\text{Na}]^+$  calcd for  $\text{C}_{17}\text{H}_{16}\text{NaO}_5$ : 323.0890; found: 323.0890.

**m.p.** 141–142 °C.

**$[\alpha]_D^{25}$**  = +16.7 ( $c$  = 0.20,  $\text{CH}_2\text{Cl}_2$ ).

**rac-3n:**

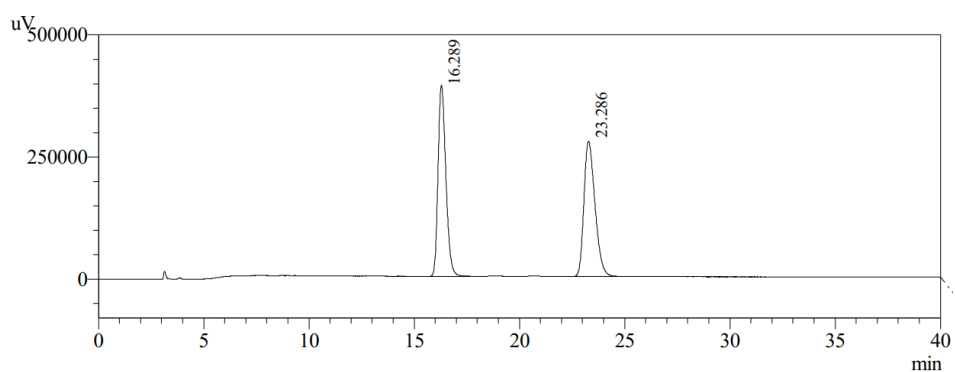

Ch1 210nm 4nm

| Peak# | Ret. Time | Area     | Height | Area %  | Height % |
|-------|-----------|----------|--------|---------|----------|
| 1     | 16.289    | 10114844 | 391677 | 49.891  | 58.559   |
| 2     | 23.286    | 10158885 | 277186 | 50.109  | 41.441   |
| Total |           | 20273730 | 668863 | 100.000 | 100.000  |

**cat-3n:**

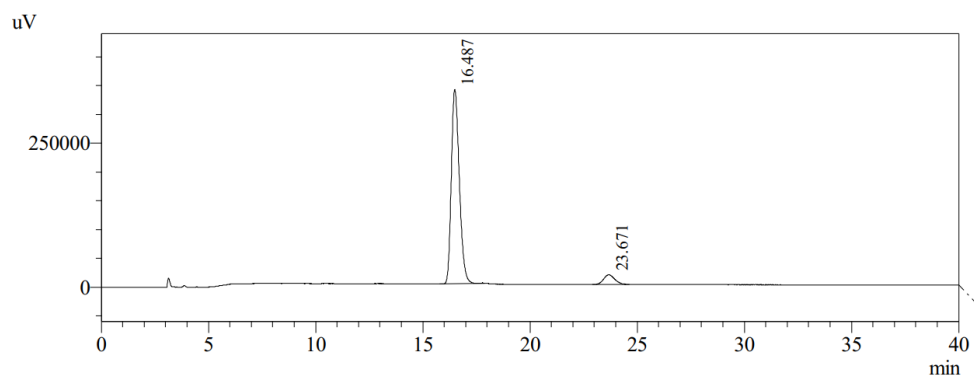

Ch1 210nm 4nm

| Peak# | Ret. Time | Area    | Height | Area %  | Height % |
|-------|-----------|---------|--------|---------|----------|
| 1     | 16.487    | 8783036 | 337813 | 93.571  | 95.265   |
| 2     | 23.671    | 603457  | 16790  | 6.429   | 4.735    |
| Total |           | 9386493 | 354603 | 100.000 | 100.000  |

**Methyl (4*S*,4*aS*,9*aR*)-8-methoxy-10-oxo-1,4*a*,9,9*a*-tetrahydro-4*H*-1,4-(epoxymethano)fluorene-4-carboxylate (**3o**)**

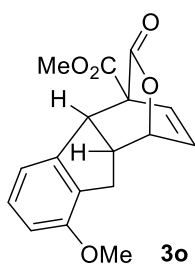

Following the general procedure, the reaction was stirred at 35 °C for 72 h. Product **3o** was obtained as a white solid (18 mg, 60% yield, 90% *ee*).

**TLC:**  $R_f$  = 0.4 (Petroleum ether/ethyl acetate 2:1).

**$^1\text{H}$  NMR** (500 MHz,  $\text{CDCl}_3$ )  $\delta$  7.03 (t,  $J$  = 7.9 Hz, 1H), 6.60 (d,  $J$  = 8.1 Hz, 1H), 6.52 (s, 1H), 6.45 (d,  $J$  = 7.1 Hz, 1H), 6.31 (dd,  $J$  = 7.9, 5.0 Hz, 1H), 5.20 (td,  $J$  = 4.7, 1.8 Hz, 1H), 4.27 (d,  $J$  = 8.8 Hz, 1H), 3.94 (s, 3H), 3.70 (s, 3H), 3.35 (ddd,  $J$  = 13.2, 8.7, 4.2 Hz, 1H), 2.95 (dd,  $J$  = 17.5, 10.4 Hz, 1H), 2.37 (dd,  $J$  = 17.5, 3.8 Hz, 1H).

**$^{13}\text{C}$  NMR** (101 MHz,  $\text{CDCl}_3$ )  $\delta$  170.1, 168.4, 155.9, 141.7, 132.5, 131.1, 129.1, 129.0, 116.0, 109.2, 77.0, 59.6, 55.1, 53.1, 48.6, 42.0, 31.0.

**HPLC:** 90% *ee*, chiral stationary column: AD, mobile phase: hexane/EtOH = 90/10, 1.0 mL/min, 210 nm, 30 °C,  $t_R$  (major) = 16.1 min,  $t_R$  (minor) = 22.3 min.

**HRMS:**  $m/z$   $[\text{M}+\text{Na}]^+$  calcd for  $\text{C}_{17}\text{H}_{16}\text{NaO}_5$ : 323.0890; found: 323.0891.

**m.p.** 117–118 °C.

**$[\alpha]^{25}_D$**  = +16.1 ( $c$  = 0.19,  $\text{CH}_2\text{Cl}_2$ ).



**rac-3o:**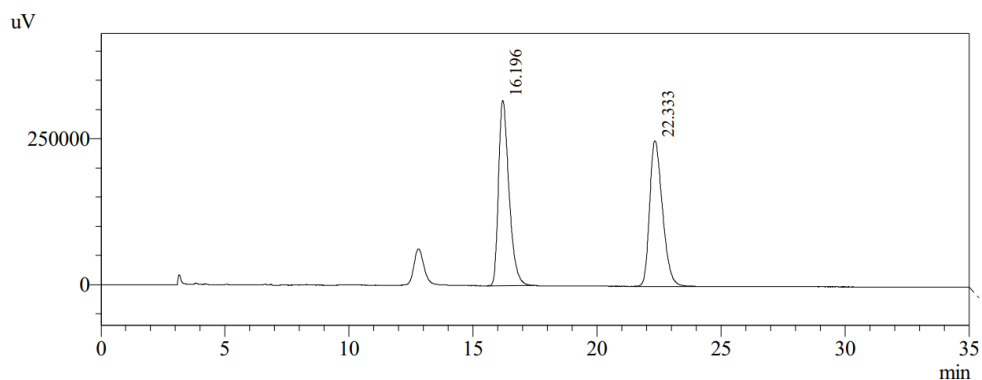

Ch1 210nm 4nm

| Peak# | Ret. Time | Area     | Height | Area %  | Height % |
|-------|-----------|----------|--------|---------|----------|
| 1     | 16.196    | 9338696  | 317409 | 51.050  | 55.983   |
| 2     | 22.333    | 8954414  | 249562 | 48.950  | 44.017   |
| Total |           | 18293110 | 566971 | 100.000 | 100.000  |

**cat-3o:**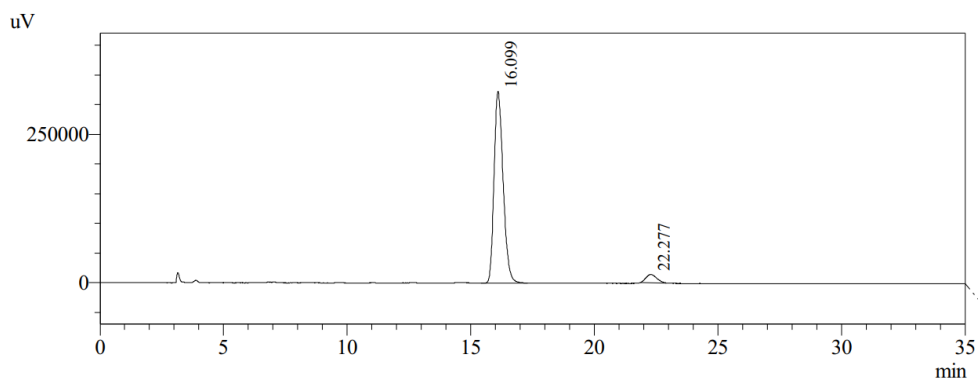

Ch1 210nm 4nm

| Peak# | Ret. Time | Area    | Height | Area %  | Height % |
|-------|-----------|---------|--------|---------|----------|
| 1     | 16.099    | 8242872 | 322669 | 95.167  | 95.863   |
| 2     | 22.277    | 418647  | 13924  | 4.833   | 4.137    |
| Total |           | 8661519 | 336593 | 100.000 | 100.000  |

**Methyl (4*S*,4*aS*,9*aR*)-5-methoxy-10-oxo-1,4*a*,9,9*a*-tetrahydro-4*H*-1,4-(epoxymethano)fluorene-4-carboxylate (**3p**)**

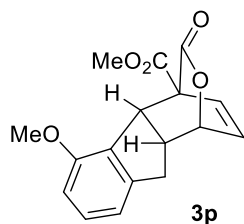

Following the general procedure, the reaction was stirred at 35 °C for 72 h. Product **3p** was obtained as a white solid (26 mg, 86% yield, 70% *ee*).

**TLC:**  $R_f$  = 0.4 (Petroleum ether/ethyl acetate 2:1).

**$^1\text{H}$  NMR** (400 MHz,  $\text{CDCl}_3$ )  $\delta$  7.16 (t,  $J$  = 7.8 Hz, 1H), 6.68 (t,  $J$  = 8.5 Hz, 2H), 6.61 (d,  $J$  = 8.1 Hz, 1H), 6.32 (dd,  $J$  = 7.8, 4.9 Hz, 1H), 5.16 (s, 1H), 4.45 (d,  $J$  = 8.2 Hz, 1H), 4.00 (s, 3H), 3.73 (s, 3H), 3.32 (ddd,  $J$  = 10.9, 7.9, 3.7 Hz, 1H), 3.18 (dd,  $J$  = 17.1, 10.4 Hz, 1H), 2.62 – 2.49 (m, 1H).

**$^{13}\text{C}$  NMR** (101 MHz,  $\text{CDCl}_3$ )  $\delta$  170.4, 168.5, 156.4, 145.3, 133.8, 130.0, 128.0, 127.2, 116.9, 108.6, 76.6, 58.7, 55.4, 52.5, 48.0, 42.3, 34.3.

**HPLC:** 70% *ee*, chiral stationary column: AD, mobile phase: hexane/EtOH = 95/5, 1.0 mL/min, 210 nm, 30 °C,  $t_R$  (major) = 27.6 min,  $t_R$  (minor) = 30.5 min.

**HRMS:**  $m/z$   $[\text{M}+\text{Na}]^+$  calcd for  $\text{C}_{17}\text{H}_{16}\text{NaO}_5$ : 323.0890; found: 323.0890.

**m.p.** 148–149 °C.

**$[\alpha]^{25}_D$**  = –34.0 ( $c$  = 0.20,  $\text{CH}_2\text{Cl}_2$ ).

**rac-3p:**

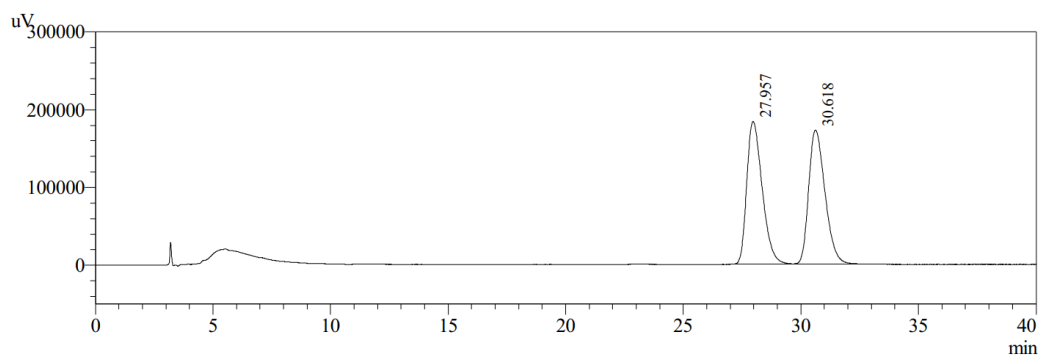

Ch1 210nm 4nm

| Peak# | Ret. Time | Area     | Height | Area %  | Height % |
|-------|-----------|----------|--------|---------|----------|
| 1     | 27.957    | 8368658  | 183657 | 50.266  | 51.600   |
| 2     | 30.618    | 8280006  | 172266 | 49.734  | 48.400   |
| Total |           | 16648664 | 355923 | 100.000 | 100.000  |

**cat-3p:**

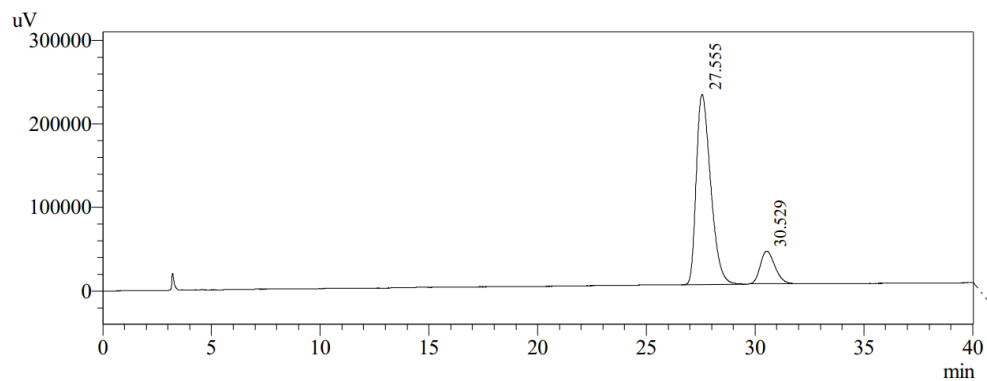

Ch1 210nm 4nm

| Peak# | Ret. Time | Area     | Height | Area %  | Height % |
|-------|-----------|----------|--------|---------|----------|
| 1     | 27.555    | 10423152 | 227689 | 85.196  | 85.343   |
| 2     | 30.529    | 1811132  | 39103  | 14.804  | 14.657   |
| Total |           | 12234285 | 266792 | 100.000 | 100.000  |

**Methyl (4*S*,4*aS*,9*aR*)-6,7-dimethoxy-10-oxo-1,4*a*,9,9*a*-tetrahydro-4*H*-1,4-(epoxymethano)fluorene-4-carboxylate (3q)**

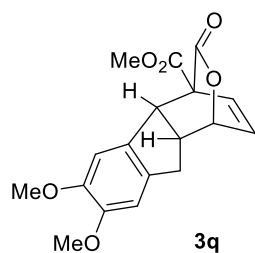

Following the general procedure, the reaction was stirred at 10 °C for 64 h. Product **3q** was obtained as a white solid (30 mg, 90% yield, 71% *ee*).

**TLC:**  $R_f$  = 0.5 (Petroleum ether/ethyl acetate 1:1).

**$^1\text{H}$  NMR** (500 MHz,  $\text{CDCl}_3$ )  $\delta$  6.47 (s, 1H), 6.42 (d,  $J$  = 4.1 Hz, 2H), 6.29 (dd,  $J$  = 7.9, 5.0 Hz, 1H), 5.18 (td,  $J$  = 4.7, 1.9 Hz, 1H), 4.17 (d,  $J$  = 8.7 Hz, 1H), 3.91 (s, 3H), 3.70 (d,  $J$  = 11.8 Hz, 6H), 3.38 – 3.28 (m, 1H), 2.98 (dd,  $J$  = 16.7, 10.4 Hz, 1H), 2.36 (dd,  $J$  = 16.7, 3.6 Hz, 1H).

**$^{13}\text{C}$  NMR** (101 MHz,  $\text{CDCl}_3$ )  $\delta$  170.1, 168.6, 149.6, 148.5, 134.9, 132.3, 131.3, 129.0, 107.1, 106.5, 77.0, 59.9, 55.9, 55.8, 53.1, 48.4, 42.3, 33.9.

**HPLC:** 71% *ee*, chiral stationary column: AD, mobile phase: hexane/EtOH = 80/20, 1.0 mL/min, 210 nm, 30 °C,  $t_R$  (major) = 15.0 min,  $t_R$  (minor) = 24.3 min.

**HRMS:**  $m/z$   $[\text{M}+\text{Na}]^+$  calcd for  $\text{C}_{18}\text{H}_{18}\text{NaO}_6$ : 353.0996; found: 353.0995.

**m.p.** 100–101 °C.

**$[\alpha]^{25}_D$**  = +10.4 ( $c$  = 0.24,  $\text{CH}_2\text{Cl}_2$ ).

**rac-3q:**

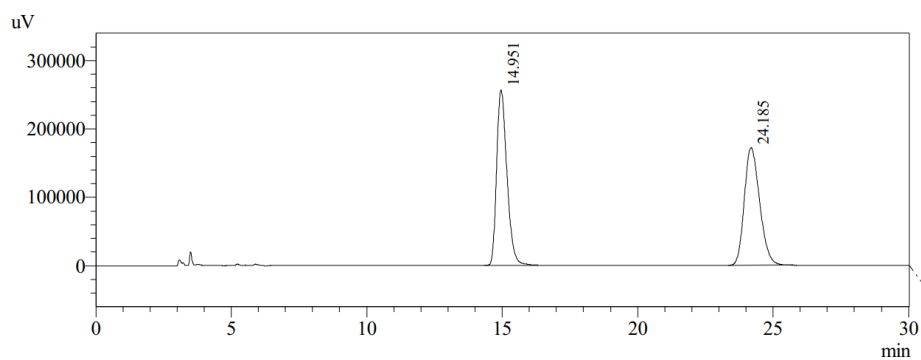

Ch1 210nm 4nm

| Peak# | Ret. Time | Area     | Height | Area %  | Height % |
|-------|-----------|----------|--------|---------|----------|
| 1     | 14.951    | 6780117  | 256842 | 49.968  | 59.860   |
| 2     | 24.185    | 6788724  | 172233 | 50.032  | 40.140   |
| Total |           | 13568841 | 429075 | 100.000 | 100.000  |

**cat-3q:**

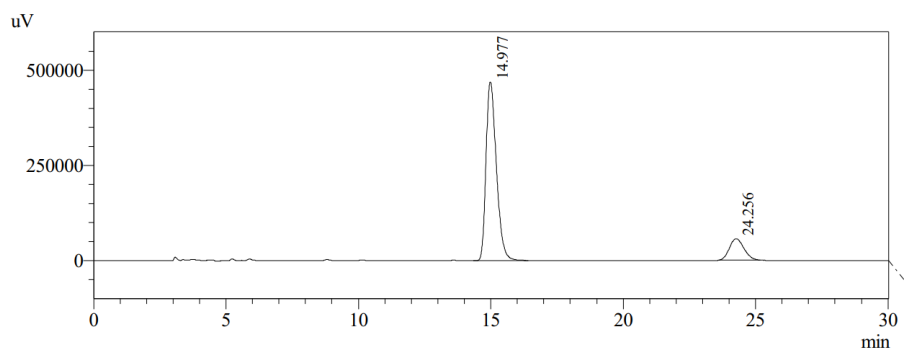

Ch1 210nm 4nm

| Peak# | Ret. Time | Area     | Height | Area %  | Height % |
|-------|-----------|----------|--------|---------|----------|
| 1     | 14.977    | 12725585 | 468684 | 85.680  | 89.304   |
| 2     | 24.256    | 2126810  | 56136  | 14.320  | 10.696   |
| Total |           | 14852394 | 524820 | 100.000 | 100.000  |

**Methyl (4*S*,4*aS*,9*aR*)-6-bromo-10-oxo-1,4*a*,9,9*a*-tetrahydro-4*H*-1,4-(epoxymethano)fluorene-4-carboxylate (**3r**)**

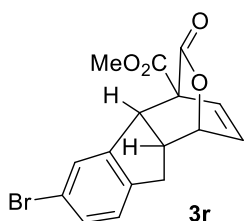

Following the general procedure, reaction time 90 h. Product **3r** was obtained as a white solid (25 mg, 71% yield, 82% *ee*).

**TLC:**  $R_f$  = 0.5 (Petroleum ether/ethyl acetate 2:1).

**$^1\text{H}$  NMR** (400 MHz,  $\text{CDCl}_3$ )  $\delta$  7.31 (dd,  $J$  = 8.1, 1.5 Hz, 1H), 7.15 (s, 1H), 6.97 (d,  $J$  = 8.1 Hz, 1H), 6.57 – 6.51 (m, 1H), 6.41 (dd,  $J$  = 7.9, 5.0 Hz, 1H), 5.29 (td,  $J$  = 4.7, 1.9 Hz, 1H), 4.33 (d,  $J$  = 8.9 Hz, 1H), 4.04 (s, 3H), 3.45 (ddt,  $J$  = 10.4, 8.7, 4.2 Hz, 1H), 3.11 (dd,  $J$  = 17.4, 10.5 Hz, 1H), 2.49 (dd,  $J$  = 17.4, 4.1 Hz, 1H).

**$^{13}\text{C}$  NMR** (101 MHz,  $\text{CDCl}_3$ )  $\delta$  169.7, 168.2, 142.3, 142.2, 132.6, 131.5, 129.2, 127.5, 126.3, 120.9, 76.8, 59.7, 53.3, 47.9, 42.1, 33.6.

**HPLC:** 82% *ee*, chiral stationary column: AD, mobile phase: hexane/EtOH = 90/10, 1.0 mL/min, 210 nm, 30 °C,  $t_R$  (major) = 19.2 min,  $t_R$  (minor) = 22.7 min.

**HRMS:**  $m/z$   $[\text{M}+\text{Na}]^+$  calcd for  $\text{C}_{16}\text{H}_{13}\text{NaO}_4\text{Br}$ : 370.9889, 372.9869; found: 370.9890, 372.9868.

**m.p.** 136–137 °C.

**$[\alpha]_D^{25}$**  = –15.5 ( $c$  = 0.22,  $\text{CH}_2\text{Cl}_2$ ).

**rac-3r:**

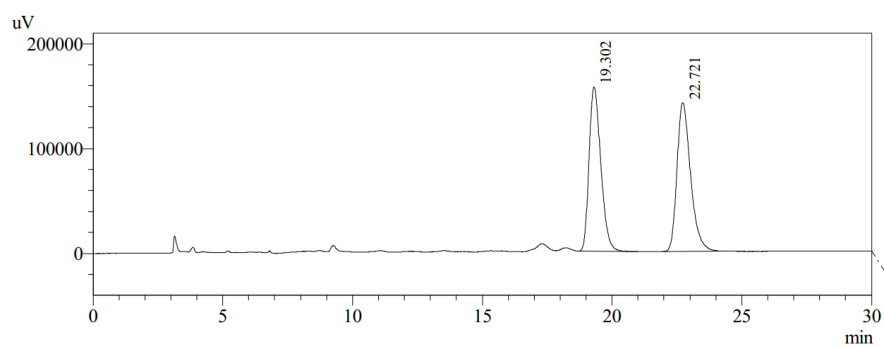

Ch1 210nm 4nm

| Peak# | Ret. Time | Area     | Height | Area %  | Height % |
|-------|-----------|----------|--------|---------|----------|
| 1     | 19.302    | 4944710  | 156797 | 48.840  | 52.510   |
| 2     | 22.721    | 5179679  | 141806 | 51.160  | 47.490   |
| Total |           | 10124389 | 298603 | 100.000 | 100.000  |

**cat-3r:**

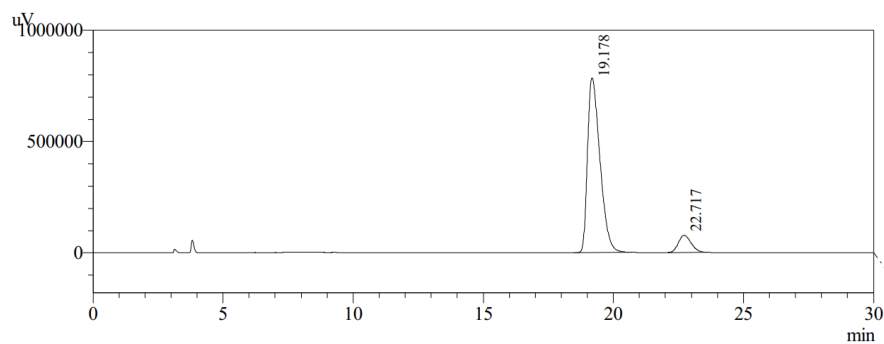

Ch1 210nm 4nm

| Peak# | Ret. Time | Area     | Height | Area %  | Height % |
|-------|-----------|----------|--------|---------|----------|
| 1     | 19.178    | 26075608 | 784304 | 90.814  | 91.027   |
| 2     | 22.717    | 2637571  | 77309  | 9.186   | 8.973    |
| Total |           | 28713179 | 861613 | 100.000 | 100.000  |

**Methyl (4*S*,4*aS*,9*aR*)-7-bromo-10-oxo-1,4*a*,9,9*a*-tetrahydro-4*H*-1,4-(epoxymethano)fluorene-4-carboxylate (**3s**)**

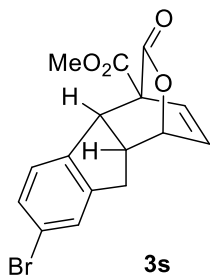

Following the general procedure, reaction time 72 h. Product **3s** was obtained as a white solid (26 mg, 75% yield, 81% *ee*).

**TLC:**  $R_f$  = 0.5 (Petroleum ether/ethyl acetate 2:1).

**$^1\text{H}$  NMR** (500 MHz,  $\text{CDCl}_3$ )  $\delta$  7.25 (d,  $J$  = 7.6 Hz, 2H), 6.89 (d,  $J$  = 8.1 Hz, 1H), 6.51 (ddd,  $J$  = 7.9, 2.0, 0.9 Hz, 1H), 6.41 (dd,  $J$  = 7.9,

4.9 Hz, 1H), 5.29 (ddd,  $J$  = 6.7, 4.9, 2.6 Hz, 1H), 4.30 (d,  $J$  = 8.8 Hz, 1H), 4.02 (s, 3H), 3.49 – 3.40 (m, 1H), 3.15 (dd,  $J$  = 17.5, 10.5 Hz, 1H), 2.53 (dd,  $J$  = 17.5, 4.1 Hz, 1H).

**$^{13}\text{C}$  NMR** (126 MHz,  $\text{CDCl}_3$ )  $\delta$  169.8, 168.3, 145.6, 139.1, 132.7, 130.5, 129.2, 128.1, 125.7, 122.4, 76.8, 59.7, 53.3, 47.7, 42.0, 33.8.

**HPLC:** 81% *ee*, chiral stationary column: AD, mobile phase: hexane/EtOH = 95/5, 1.0 mL/min, 210 nm, 30 °C,  $t_R$  (major) = 29.2 min,  $t_R$  (minor) = 43.0 min.

**HRMS:**  $m/z$   $[\text{M}+\text{Na}]^+$  calcd for  $\text{C}_{16}\text{H}_{13}\text{NaO}_4\text{Br}$ : 370.9889, 372.9869; found: 370.9889, 372.9868.

**m.p.** 146–147 °C.

**$[\alpha]^{25}_D$**  = +24.7 ( $c$  = 0.23,  $\text{CH}_2\text{Cl}_2$ ).



**rac-3s:**

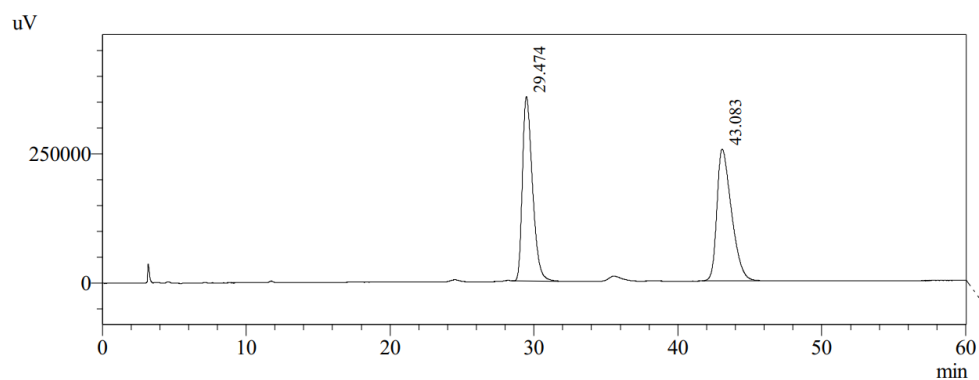

PDA Ch1 210nm 4nm

| Peak# | Ret. Time | Area     | Height | Area %  | Height % |
|-------|-----------|----------|--------|---------|----------|
| 1     | 29.474    | 17247619 | 355516 | 49.125  | 58.282   |
| 2     | 43.083    | 17861797 | 254473 | 50.875  | 41.718   |
| Total |           | 35109416 | 609989 | 100.000 | 100.000  |

**cat-3s:**

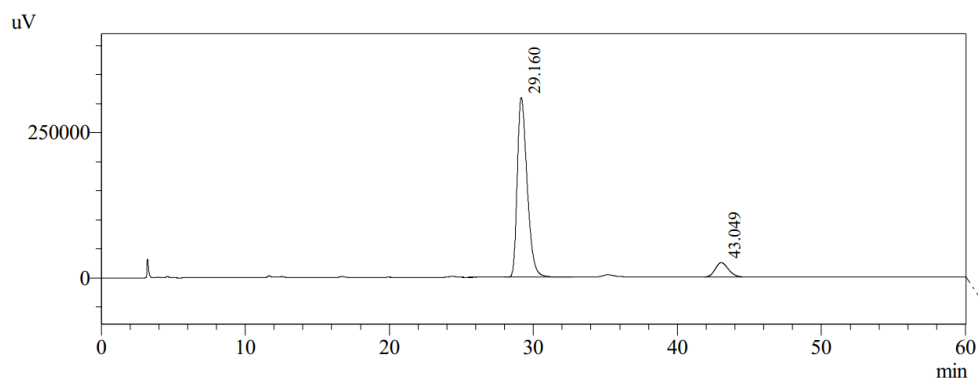

PDA Ch1 210nm 4nm

| Peak# | Ret. Time | Area     | Height | Area %  | Height % |
|-------|-----------|----------|--------|---------|----------|
| 1     | 29.160    | 14763040 | 309781 | 90.474  | 92.627   |
| 2     | 43.049    | 1554339  | 24656  | 9.526   | 7.373    |
| Total |           | 16317379 | 334438 | 100.000 | 100.000  |

**Methyl (4*S*,4*aS*,9*aR*)-8-bromo-10-oxo-1,4*a*,9,9*a*-tetrahydro-4*H*-1,4-(epoxymethano)fluorene-4-carboxylate (**3t**)**

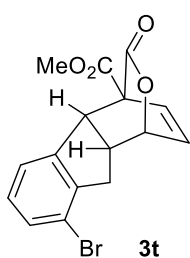

Following the general procedure, reaction time 6 d. Product **3t** was obtained as a white solid (24 mg, 68% yield, 82% *ee*).

**TLC:**  $R_f$  = 0.5 (Petroleum ether/ethyl acetate 2:1).

**$^1\text{H}$  NMR** (400 MHz,  $\text{CDCl}_3$ )  $\delta$  7.39 (d,  $J$  = 7.7 Hz, 1H), 7.05 (t,  $J$  = 7.7 Hz, 1H), 6.99 (d,  $J$  = 7.6 Hz, 1H), 6.57 (d,  $J$  = 7.1 Hz, 1H), 6.48 (dd,  $J$

= 7.9, 5.0 Hz, 1H), 5.35 (dt,  $J$  = 4.6, 2.4 Hz, 1H), 4.47 (d,  $J$  = 8.9 Hz, 1H), 4.06 (s, 3H), 3.55 – 3.41 (m, 1H), 3.18 (dd,  $J$  = 17.8, 10.5 Hz, 1H), 2.57 (dd,  $J$  = 17.8, 3.8 Hz, 1H).

**$^{13}\text{C}$  NMR** (101 MHz,  $\text{CDCl}_3$ )  $\delta$  169.6, 168.2, 143.6, 141.7, 132.6, 131.4, 129.2, 129.1, 123.0, 120.2, 76.7, 59.7, 53.2, 49.1, 40.8, 35.9.

**HPLC:** 82% *ee*, chiral stationary column: AD, mobile phase: hexane/EtOH = 95/5, 1.0 mL/min, 210 nm, 30 °C,  $t_R$  (major) = 18.8 min,  $t_R$  (minor) = 28.1 min.

**HRMS:**  $m/z$   $[\text{M}+\text{Na}]^+$  calcd for  $\text{C}_{16}\text{H}_{13}\text{NaO}_4\text{Br}$ : 370.9889, 372.9869; found: 370.9890, 372.9869.

**m.p.** 140–141 °C.

**$[\alpha]^{25}_D$**  = +38.5 ( $c$  = 0.22,  $\text{CH}_2\text{Cl}_2$ ).

**rac-3t:**

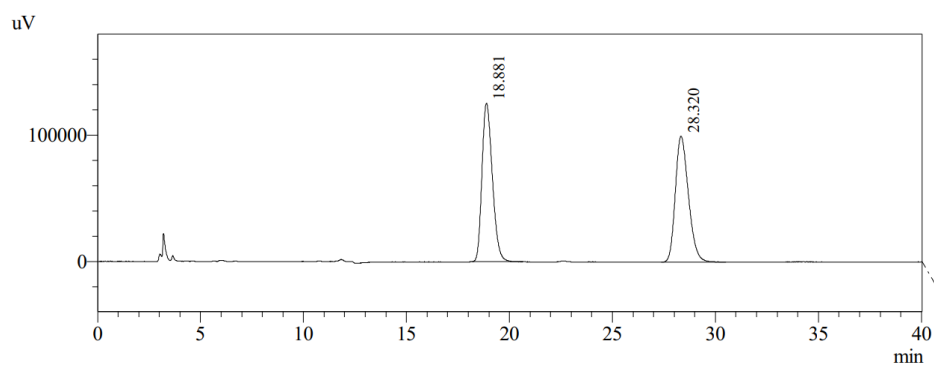

PDA Ch1 210nm 4nm

| Peak# | Ret. Time | Area    | Height | Area %  | Height % |
|-------|-----------|---------|--------|---------|----------|
| 1     | 18.881    | 4418614 | 125816 | 49.970  | 55.745   |
| 2     | 28.320    | 4423905 | 99881  | 50.030  | 44.255   |
| Total |           | 8842519 | 225697 | 100.000 | 100.000  |

**cat-3t:**

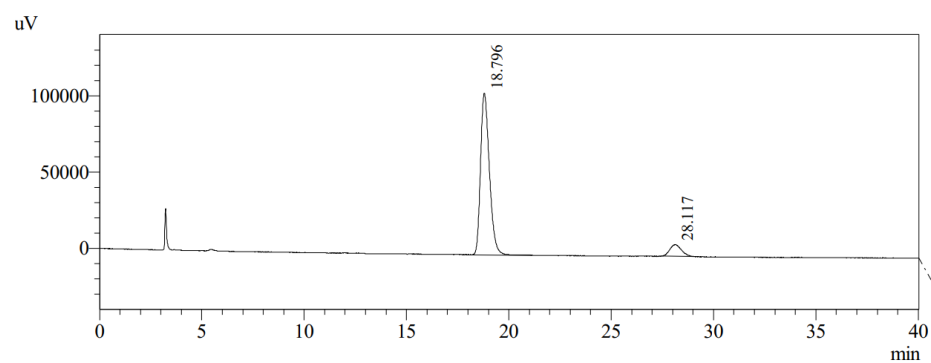

PDA Ch1 210nm 4nm

| Peak# | Ret. Time | Area    | Height | Area %  | Height % |
|-------|-----------|---------|--------|---------|----------|
| 1     | 18.796    | 3192023 | 105781 | 91.157  | 93.171   |
| 2     | 28.117    | 309650  | 7754   | 8.843   | 6.829    |
| Total |           | 3501673 | 113534 | 100.000 | 100.000  |

**Methyl (4*S*,4*aS*,9*aR*)-6-fluoro-10-oxo-1,4*a*,9,9*a*-tetrahydro-4*H*-1,4-(epoxymethano)fluorene-4-carboxylate (**3u**)**

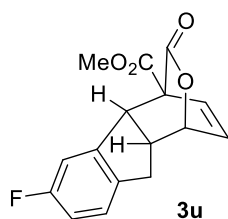

Following the general procedure, reaction time 96 h. Product **3u** was obtained as a white solid (18 mg, 62% yield, 83% *ee*).

**TLC:**  $R_f$  = 0.5 (Petroleum ether/ethyl acetate 2:1).

**$^1\text{H}$  NMR** (400 MHz,  $\text{CDCl}_3$ )  $\delta$  7.07 (dd,  $J$  = 8.2, 5.3 Hz, 1H), 6.92 (td,  $J$  = 8.6, 2.3 Hz, 1H), 6.74 (dd,  $J$  = 9.1, 2.1 Hz, 1H), 6.55 (d,  $J$  = 7.8 Hz, 1H), 6.45 (dd,  $J$  = 7.9, 5.0 Hz, 1H), 5.32 (td,  $J$  = 4.6, 1.8 Hz, 1H), 4.36 (d,  $J$  = 8.9 Hz, 1H), 4.07 (s, 3H), 3.51 (ddd,  $J$  = 13.3, 8.7, 4.2 Hz, 1H), 3.16 (dd,  $J$  = 17.0, 10.5 Hz, 1H), 2.54 (dd,  $J$  = 17.0, 3.5 Hz, 1H).

**$^{13}\text{C}$  NMR** (101 MHz,  $\text{CDCl}_3$ )  $\delta$  169.8, 168.3, 163.4, 161.0, 141.9 (d,  $J$  = 7.1 Hz), 138.6 (d,  $J$  = 2.0 Hz), 132.4, 129.2, 125.9 (d,  $J$  = 9.1 Hz), 115.6 (d,  $J$  = 22.2 Hz), 111.2 (d,  $J$  = 23.2 Hz), 76.8, 59.7, 53.3, 48.0, 48.0, 42.4, 33.2.

**$^{19}\text{F}$  NMR** (376 MHz,  $\text{CDCl}_3$ )  $\delta$  -115.35.

**HPLC:** 83% *ee*, chiral stationary column: AD, mobile phase: hexane/EtOH = 95/5, 1.0 mL/min, 210 nm, 30 °C,  $t_R$  (major) = 26.8 min,  $t_R$  (minor) = 30.9 min.

**HRMS:**  $m/z$   $[\text{M}+\text{Na}]^+$  calcd for  $\text{C}_{16}\text{H}_{13}\text{NaO}_4\text{F}$ : 311.0690; found: 311.0691.

**m.p.** 135–136 °C.

**$[\alpha]^{25}_D$**  = +25.8 ( $c$  = 0.24,  $\text{CH}_2\text{Cl}_2$ ).

**rac-3u:**

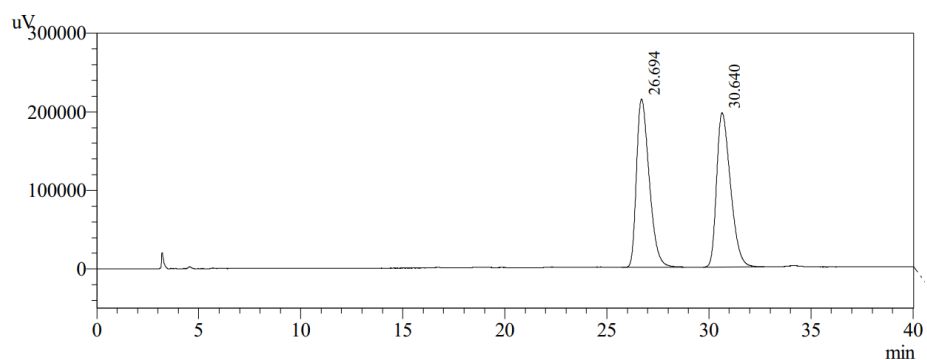

Ch1 210nm 4nm

| Peak# | Ret. Time | Area     | Height | Area %  | Height % |
|-------|-----------|----------|--------|---------|----------|
| 1     | 26.694    | 9296120  | 214485 | 49.984  | 52.213   |
| 2     | 30.640    | 9302091  | 196304 | 50.016  | 47.787   |
| Total |           | 18598212 | 410789 | 100.000 | 100.000  |

**cat-3u:**

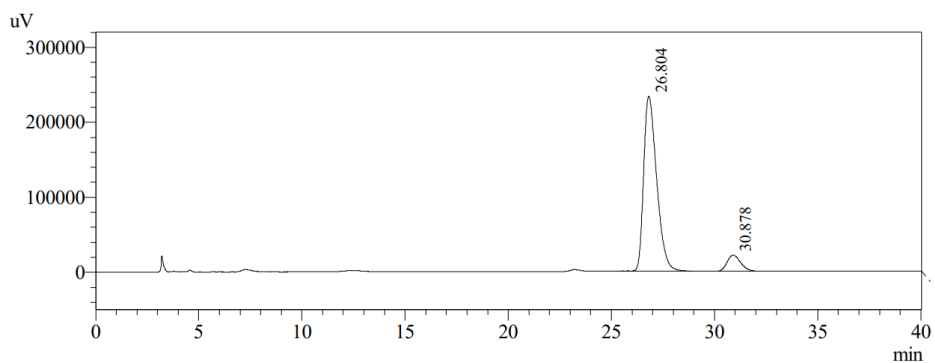

Ch1 210nm 4nm

| Peak# | Ret. Time | Area     | Height | Area %  | Height % |
|-------|-----------|----------|--------|---------|----------|
| 1     | 26.804    | 10227653 | 233272 | 91.435  | 91.633   |
| 2     | 30.878    | 958057   | 21300  | 8.565   | 8.367    |
| Total |           | 11185710 | 254572 | 100.000 | 100.000  |

**Methyl (4*S*,4*aS*,9*aR*)-6-chloro-10-oxo-1,4*a*,9,9*a*-tetrahydro-4*H*-1,4-(epoxymethano)fluorene-4-carboxylate (**3v**)**

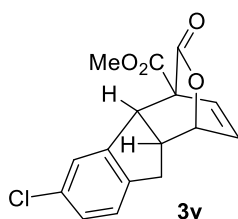

Following the general procedure, reaction time 72 h. Product **3v** was obtained as a white solid (26 mg, 85% yield, 84% *ee*).

**TLC:**  $R_f$  = 0.5 (Petroleum ether /ethyl acetate 2:1).

**$^1\text{H}$  NMR** (400 MHz,  $\text{CDCl}_3$ )  $\delta$  7.19 (dd,  $J$  = 8.1, 1.9 Hz, 1H), 7.09 – 6.99 (m, 2H), 6.57 (dd,  $J$  = 7.8, 2.1 Hz, 1H), 6.45 (dt,  $J$  = 7.8, 3.3 Hz, 1H), 5.41 – 5.26 (m, 1H), 4.36 (d,  $J$  = 8.9 Hz, 1H), 4.08 (d,  $J$  = 1.5 Hz, 3H), 3.57 – 3.41 (m, 1H), 3.17 (dd,  $J$  = 17.4, 10.5 Hz, 1H), 2.55 (dd,  $J$  = 17.4, 4.1 Hz, 1H).

**$^{13}\text{C}$  NMR** (101 MHz,  $\text{CDCl}_3$ )  $\delta$  169.7, 168.2, 141.6, 133.0, 132.6, 129.2, 128.6, 125.9, 124.5, 76.8, 59.7, 53.3, 47.9, 42.2, 33.5.

**HPLC:** 84% *ee*, chiral stationary column: AD, mobile phase: hexane/EtOH = 95/5, 1.0 mL/min, 210 nm, 30 °C,  $t_R$  (major) = 29.8 min,  $t_R$  (minor) = 34.9 min.

**HRMS:**  $m/z$   $[\text{M}+\text{Na}]^+$  calcd for  $\text{C}_{16}\text{H}_{13}\text{NaO}_4\text{Cl}$ : 327.0395, 329.0365; found: 327.0394, 329.0364.

**m.p.** 150–151 °C.

**$[\alpha]^{25}_D$**  = +25.3 ( $c$  = 0.23,  $\text{CH}_2\text{Cl}_2$ ).

**rac-3v:**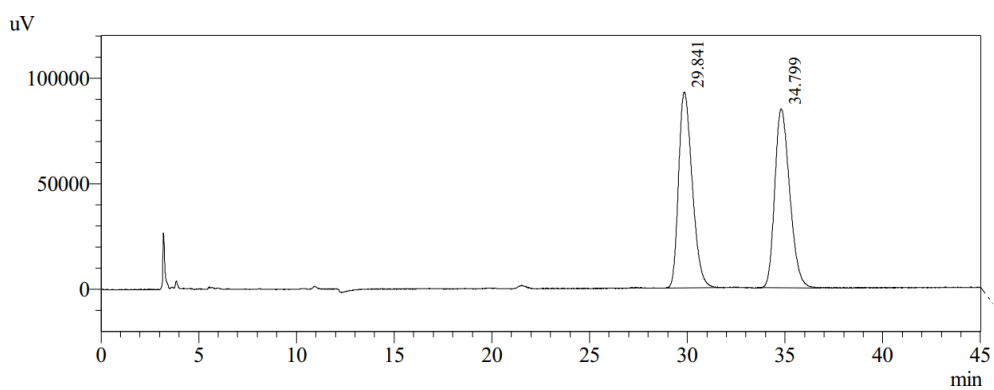**cat-3v:**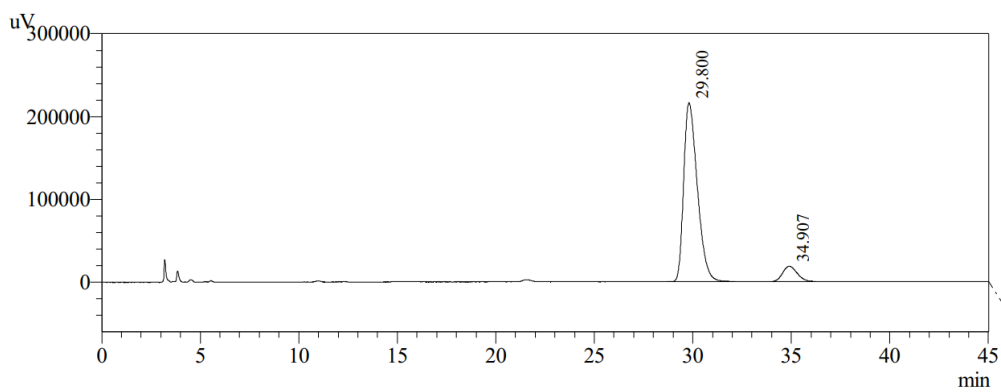

**methyl (4*S*,4*aS*,9*aR*)-7-chloro-10-oxo-1,4*a*,9,9*a*-tetrahydro-4*H*-1,4-(epoxymethano)fluorene-4-carboxylate (3w)**

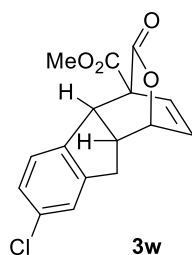

Following the general procedure, reaction time 72 h. Product **3x** was obtained as a white solid (26 mg, 85% yield, 83% *ee*).

**TLC:**  $R_f$  = 0.5 (Petroleum ether/ethyl acetate 2:1).

**$^1\text{H}$  NMR** (400 MHz,  $\text{CDCl}_3$ )  $\delta$  7.16 – 7.03 (m, 2H), 6.94 (d,  $J$  = 8.1 Hz, 1H), 6.56 – 6.45 (m, 1H), 6.41 (dd,  $J$  = 7.9, 4.9 Hz, 1H), 5.28 (td,  $J$  =

4.6, 1.8 Hz, 1H), 4.31 (d,  $J$  = 8.9 Hz, 1H), 4.02 (s, 3H), 3.54 – 3.38 (m, 1H), 3.15 (dd,  $J$  = 17.5, 10.5 Hz, 1H), 2.53 (dd,  $J$  = 17.5, 3.9 Hz, 1H).

**$^{13}\text{C}$  NMR** (101 MHz,  $\text{CDCl}_3$ )  $\delta$  169.8, 168.3, 145.2, 138.5, 134.2, 132.6, 129.1, 127.5, 125.2, 125.0, 76.7, 59.7, 53.2, 47.5, 42.0, 33.8.

**HPLC:** 83% *ee*, chiral stationary column: AD, mobile phase: hexane/EtOH = 95/5, 1.0 mL/min, 210 nm, 30 °C,  $t_R$  (major) = 25.8 min,  $t_R$  (minor) = 38.2 min.

**HRMS:**  $m/z$   $[\text{M}+\text{Na}]^+$  calcd for  $\text{C}_{16}\text{H}_{13}\text{NaO}_4\text{Cl}$ : 327.0395, 329.0365; found: 327.0396, 329.0364.

**m.p.** 135–136 °C.

**$[\alpha]^{25}_D$**  = –8.8 ( $c$  = 0.23,  $\text{CH}_2\text{Cl}_2$ ).



**rac-3w:**

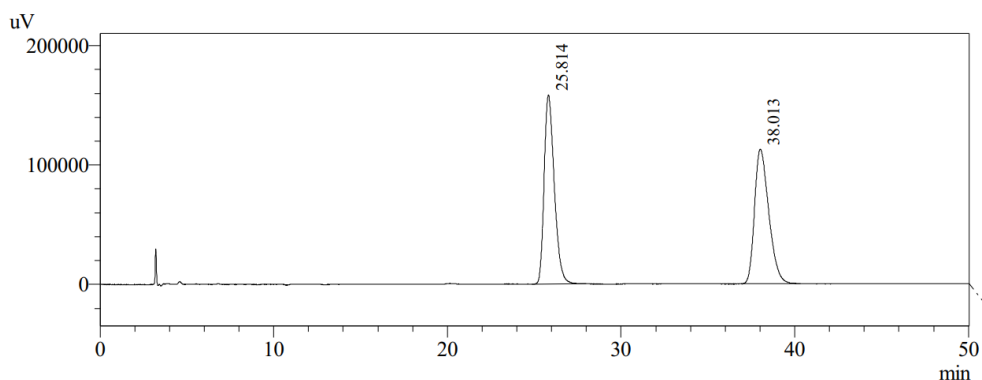

Ch1 210nm 4nm

| Peak# | Ret. Time | Area     | Height | Area %  | Height % |
|-------|-----------|----------|--------|---------|----------|
| 1     | 25.814    | 6423332  | 158265 | 50.001  | 58.443   |
| 2     | 38.013    | 6423097  | 112539 | 49.999  | 41.557   |
| Total |           | 12846429 | 270804 | 100.000 | 100.000  |

**cat-3w:**

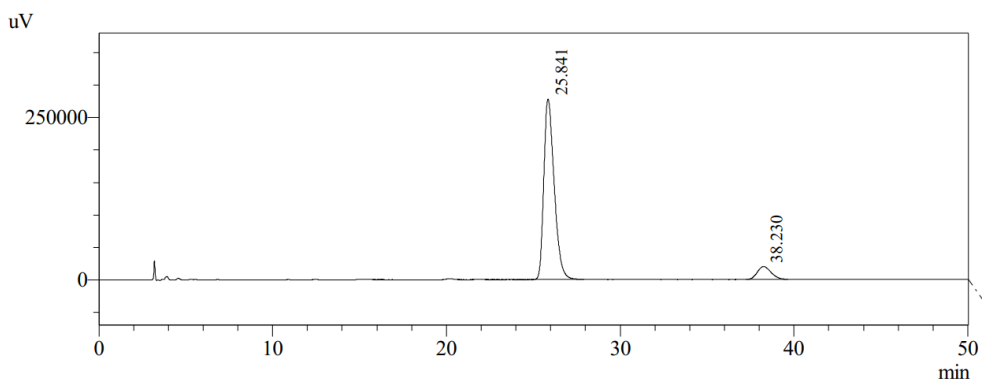

Ch1 210nm 4nm

| Peak# | Ret. Time | Area     | Height | Area %  | Height % |
|-------|-----------|----------|--------|---------|----------|
| 1     | 25.841    | 11535635 | 278117 | 91.320  | 93.315   |
| 2     | 38.230    | 1096444  | 19923  | 8.680   | 6.685    |
| Total |           | 12632078 | 298040 | 100.000 | 100.000  |

## 4. References

1. J. Huang, X. Liu, Y. Wen, B. Qin and X. Feng, *J. Org. Chem.*, 2007, **72**, 204-208.
2. X.-W. Liang, Y. Zhao, X.-G. Si, M.-M. Xu, J.-H. Tan, Z.-M. Zhang, C.-G. Zheng, C. Zheng and Q. Cai, *Angew. Chem. Int. Ed.*, 2019, **58**, 14562-14567.
3. Y. Lu, M.-M. Xu, Z.-M. Zhang, J. Zhang and Q. Cai, *Angew. Chem. Int. Ed.*, 2021, **60**, 26610-26615.

## 5. NMR Spectra

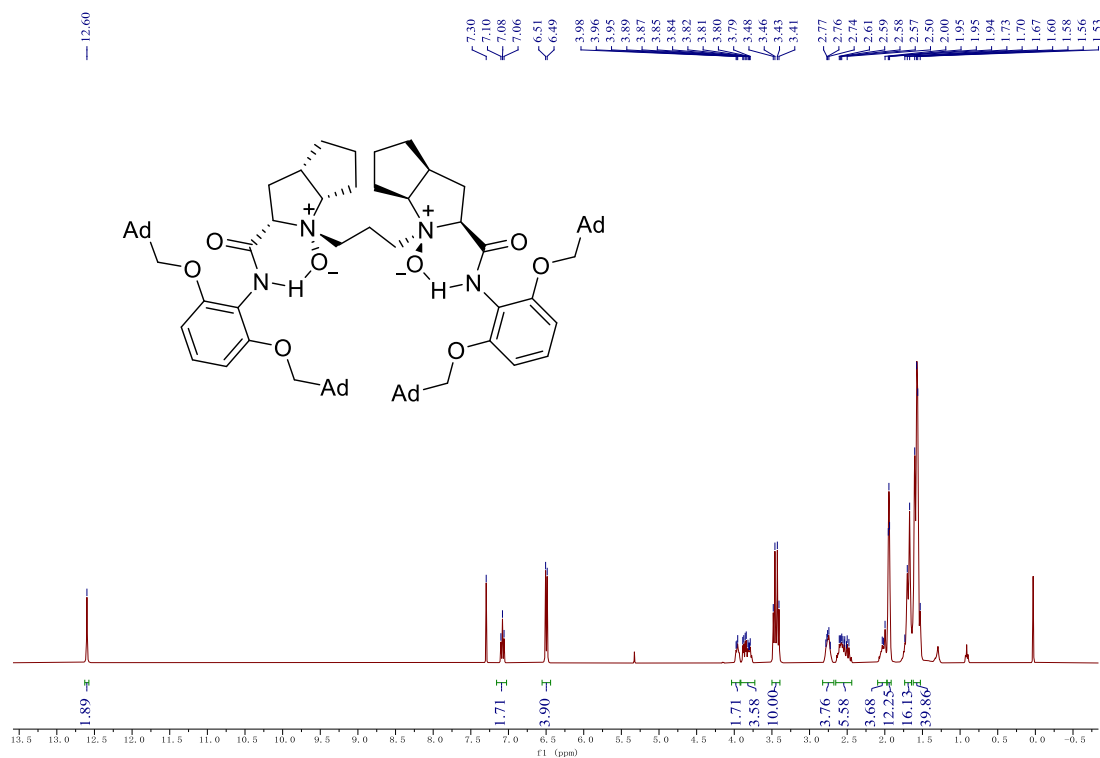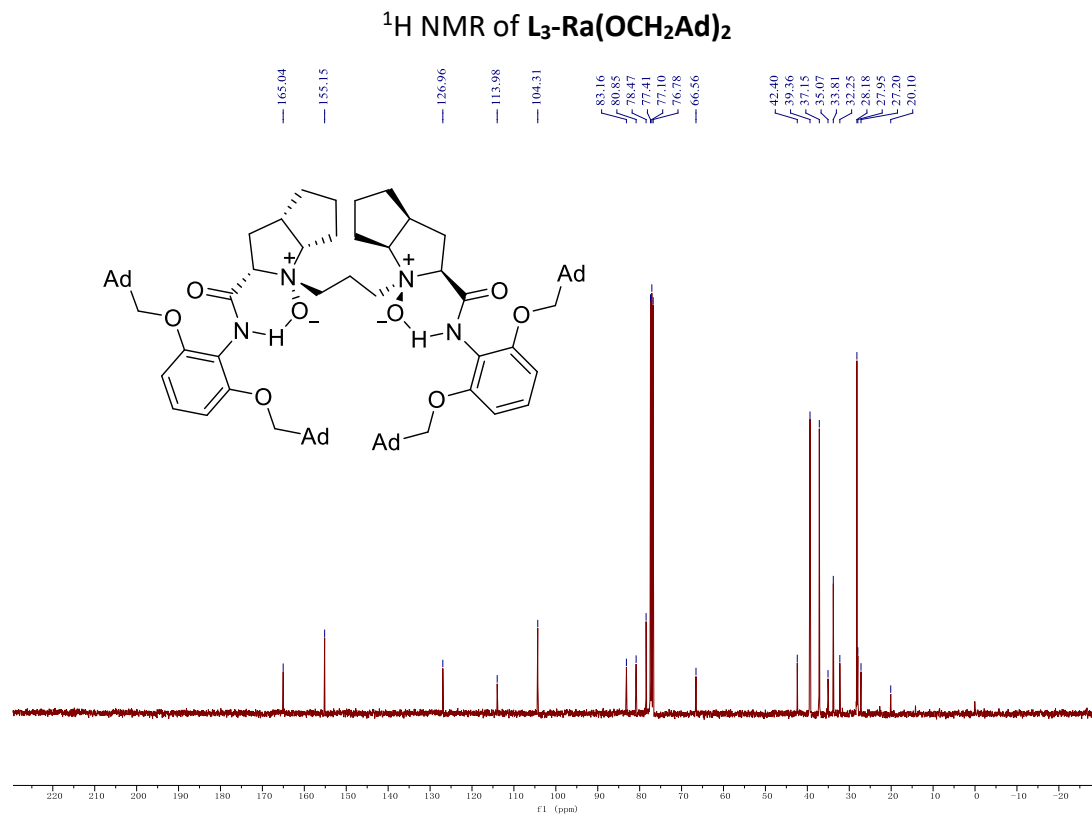

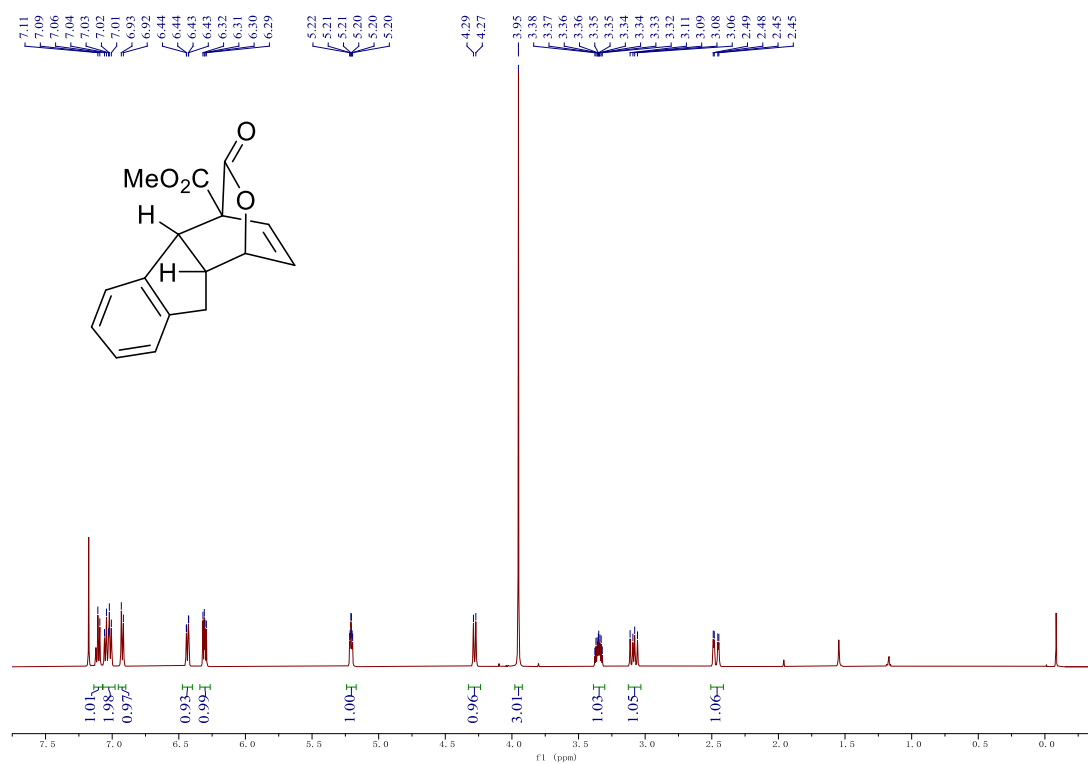

**<sup>1</sup>H NMR of Compound 3a**

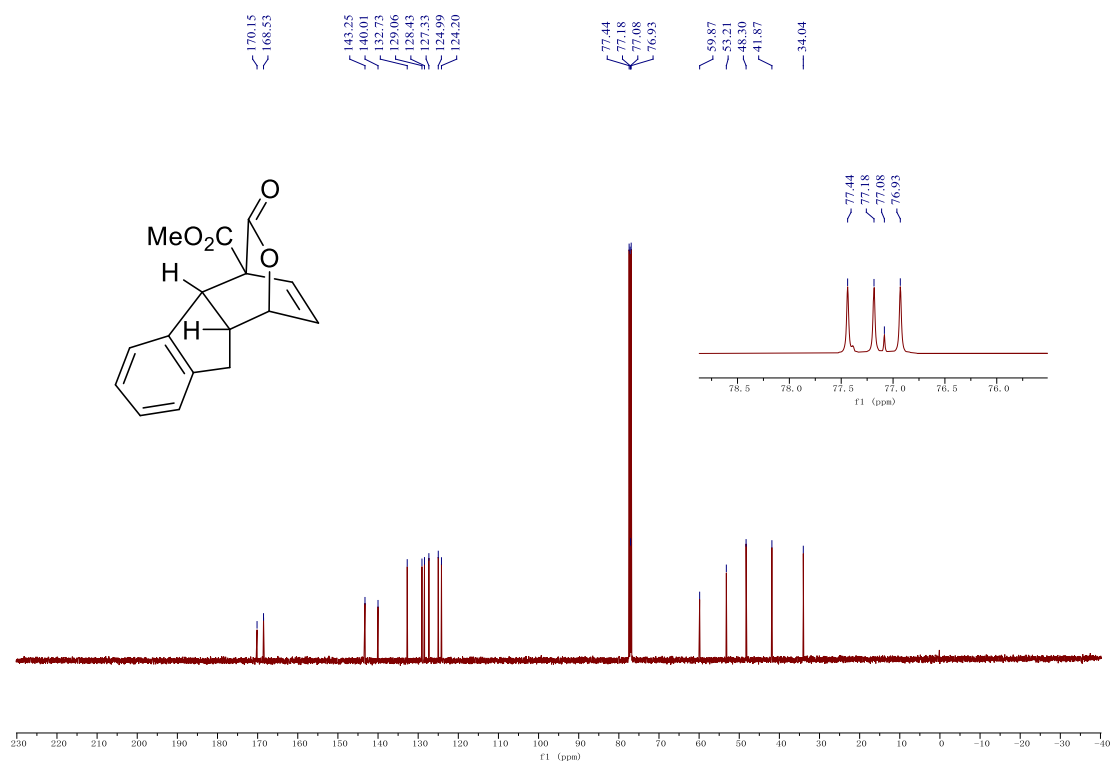

**<sup>13</sup>C NMR of Compound 3a**

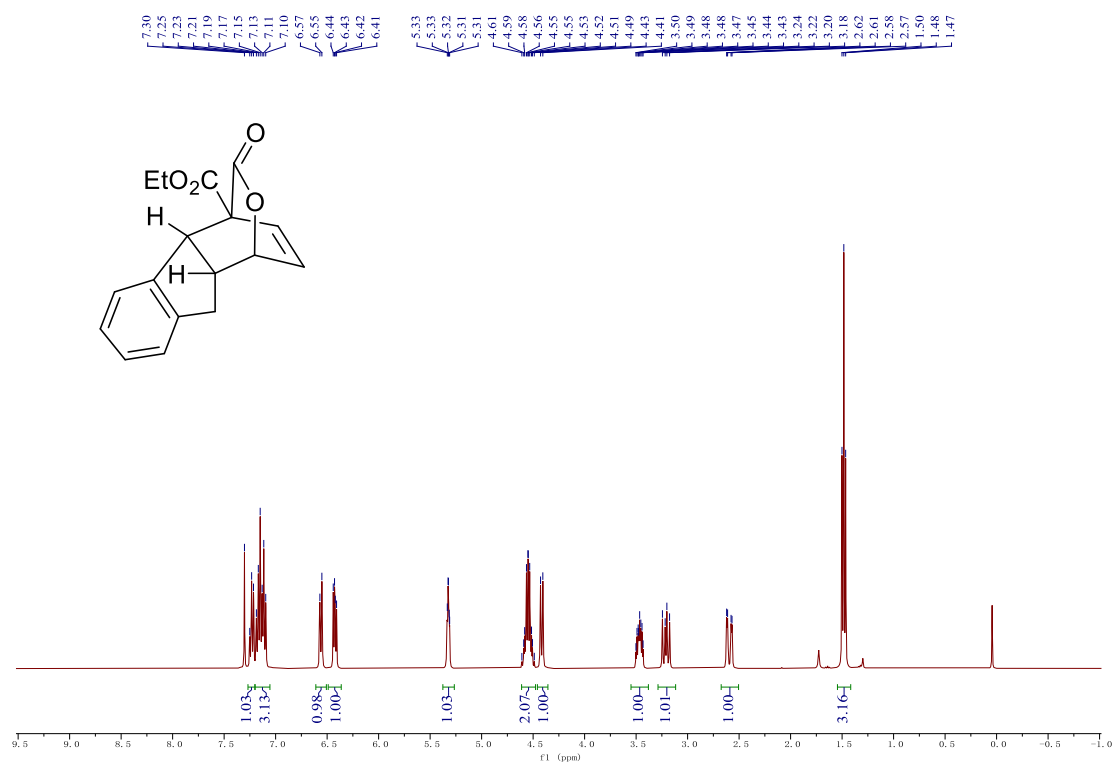

**<sup>1</sup>H NMR of Compound 3b**

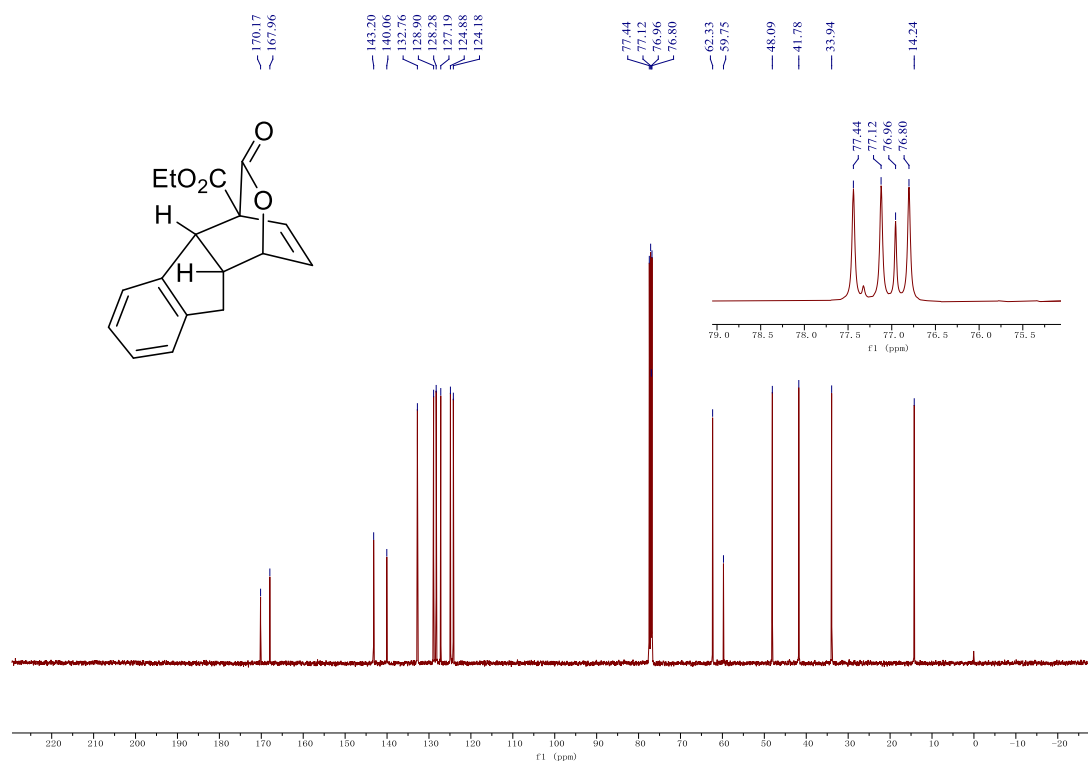

**<sup>13</sup>C NMR of Compound 3b**

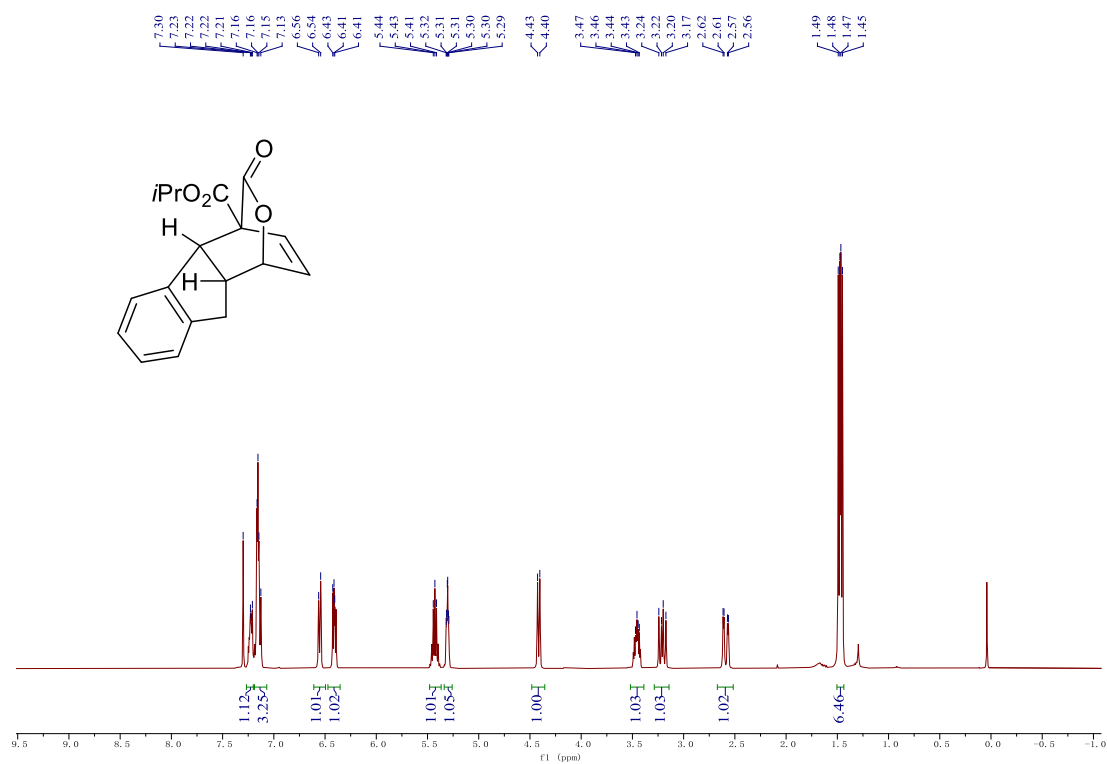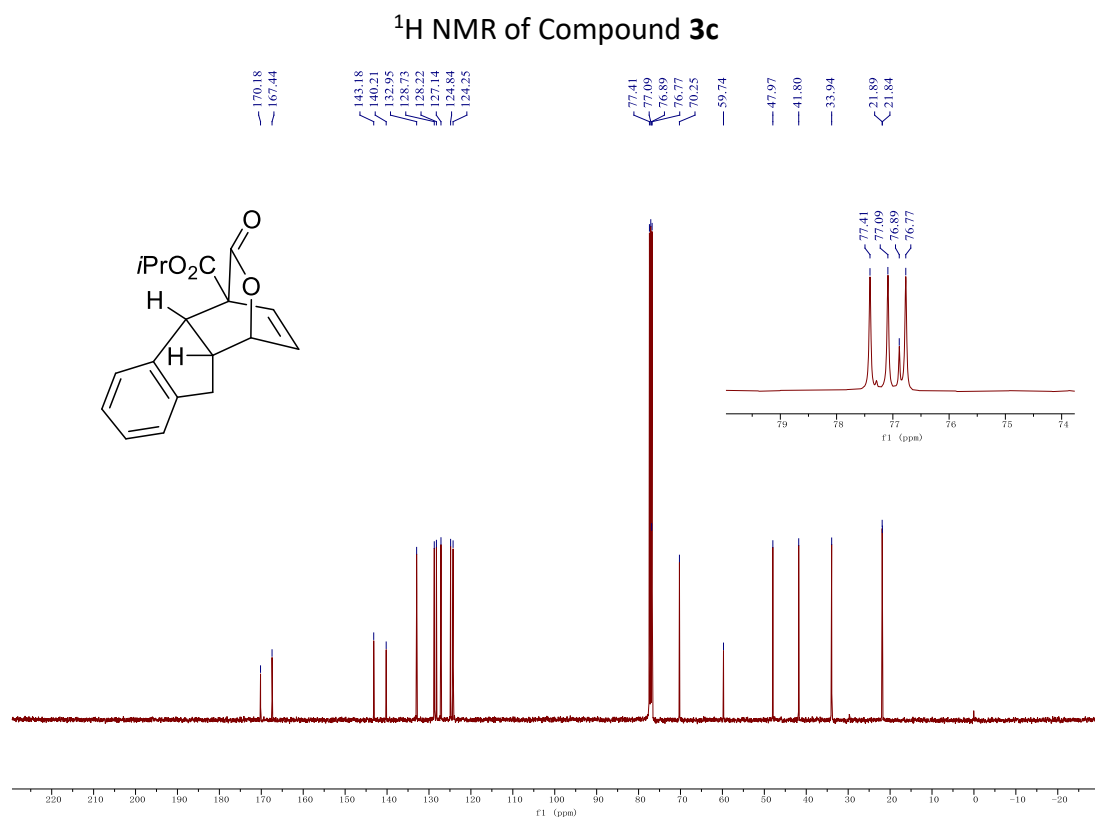

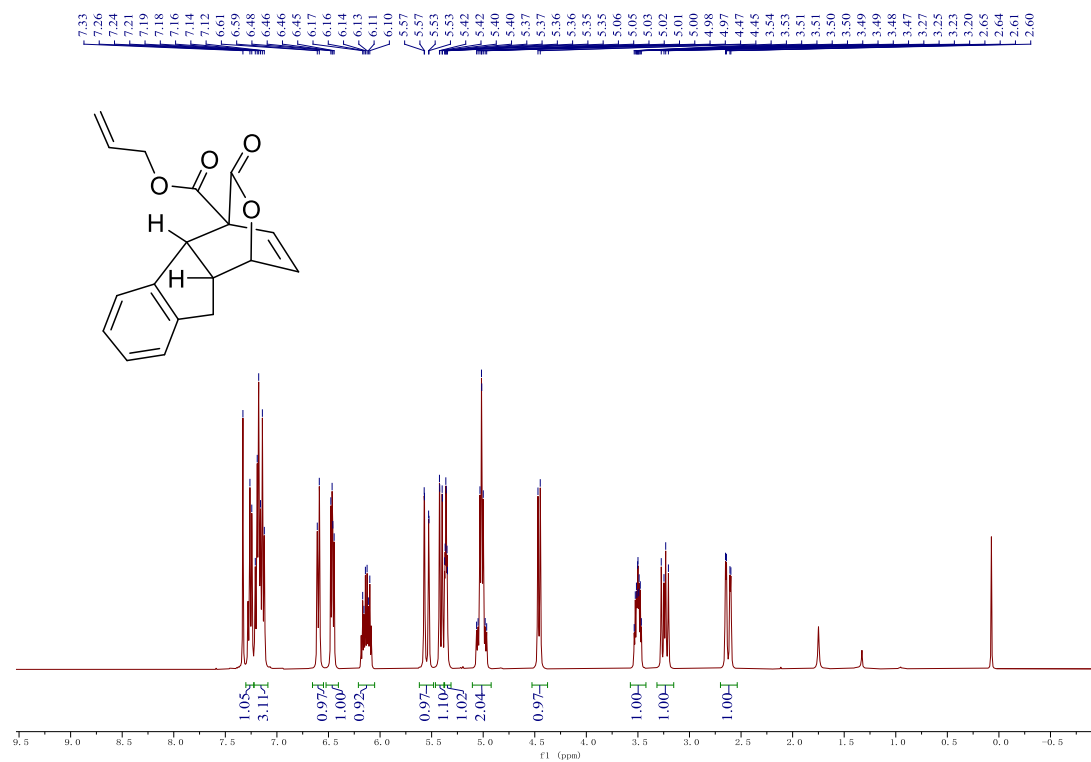

**<sup>1</sup>H NMR of Compound 3d**

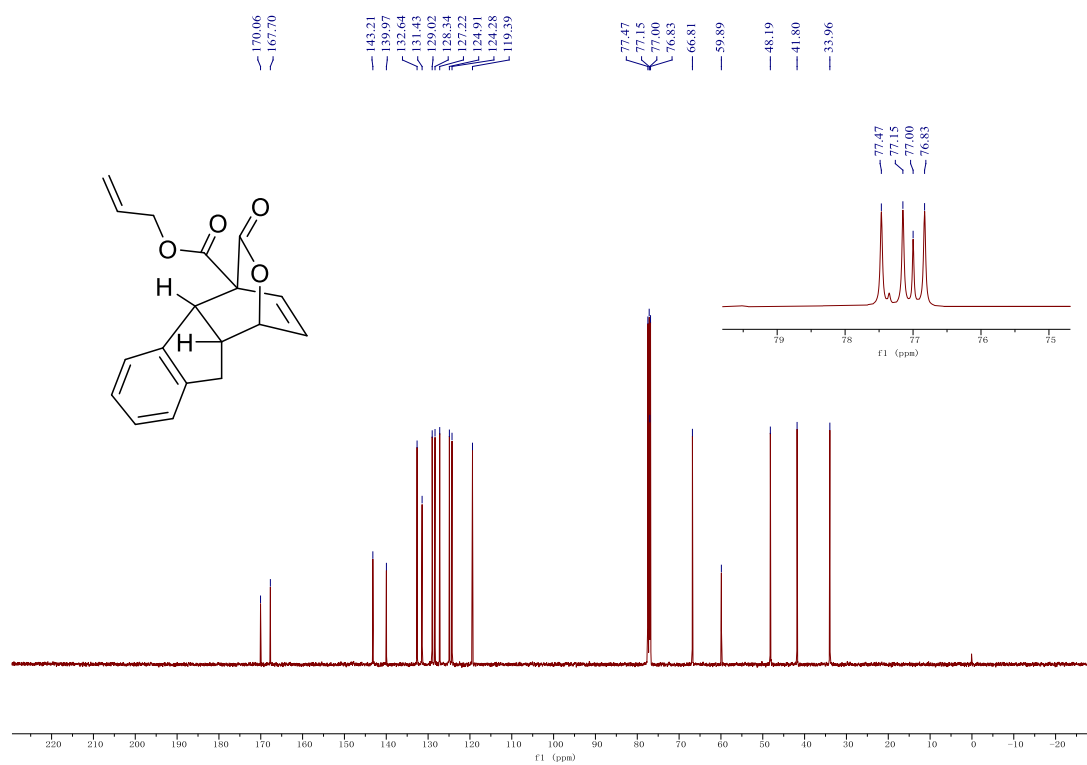

**<sup>13</sup>C NMR of Compound 3d**

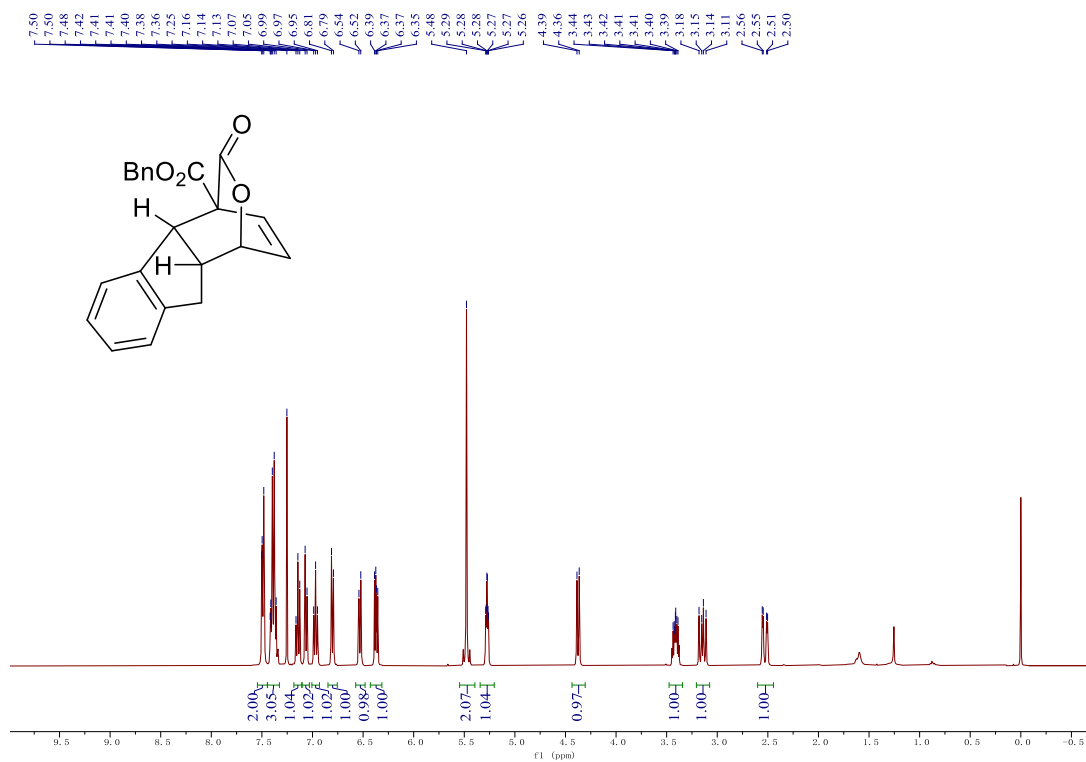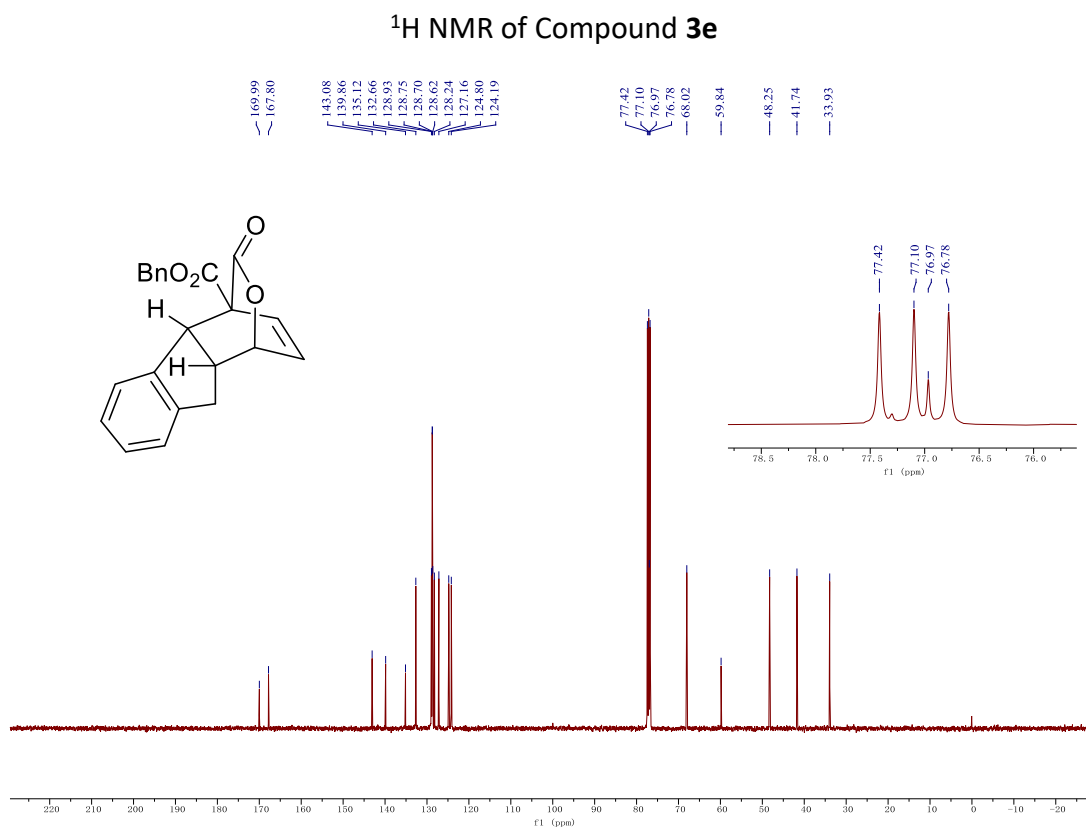

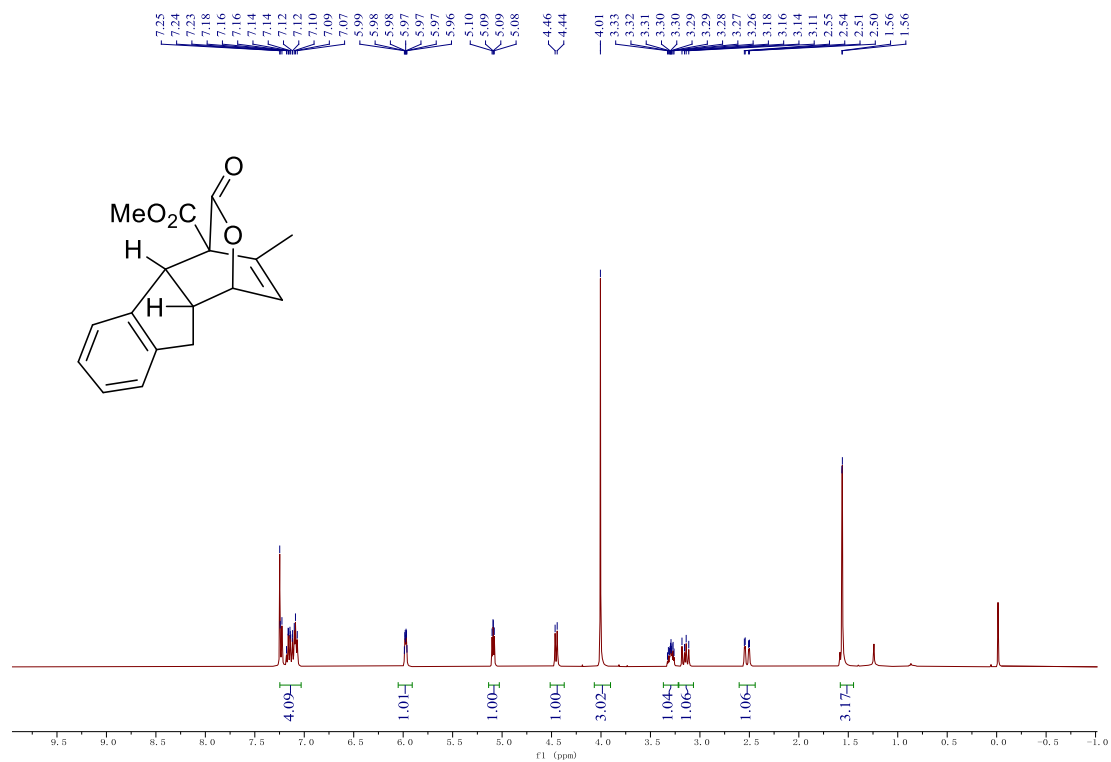

**<sup>1</sup>H NMR of Compound 3f**

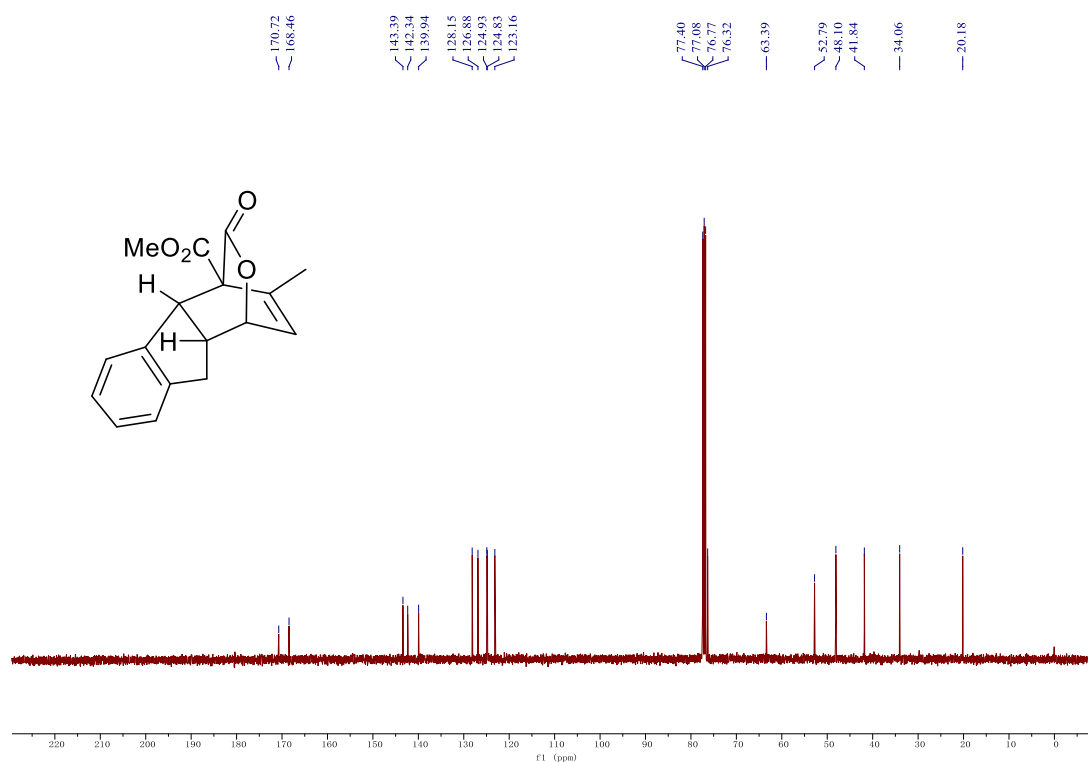

**<sup>13</sup>C NMR of Compound 3f**



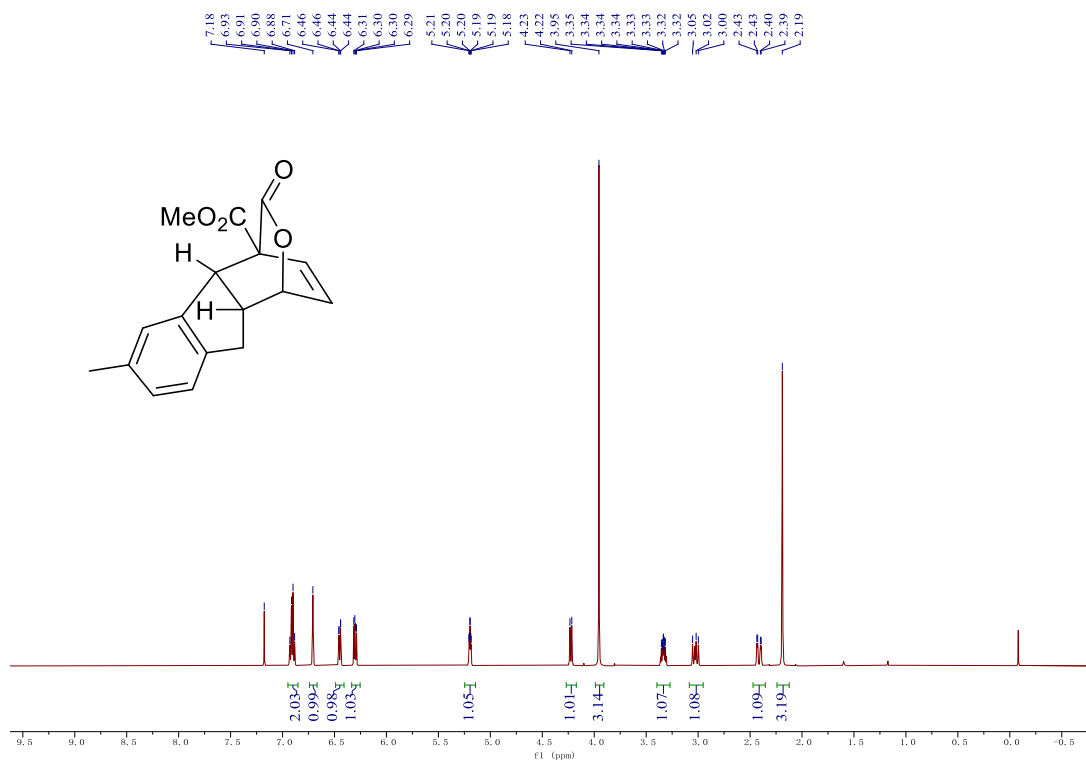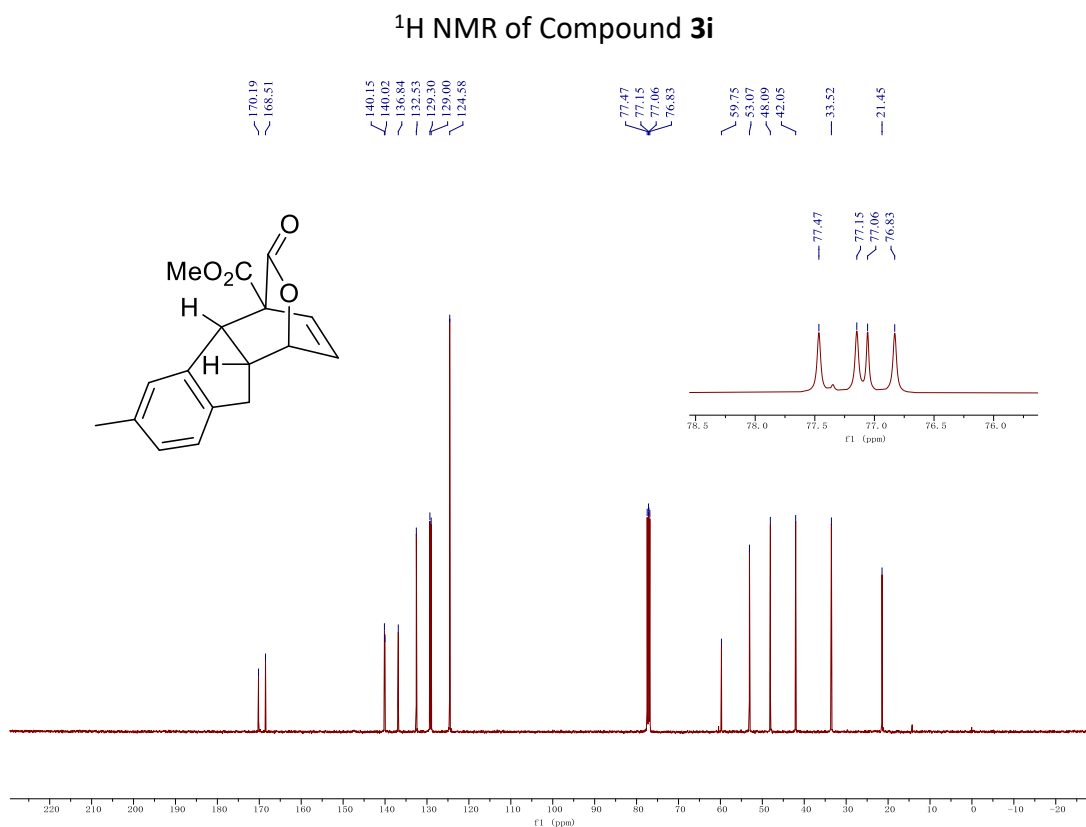

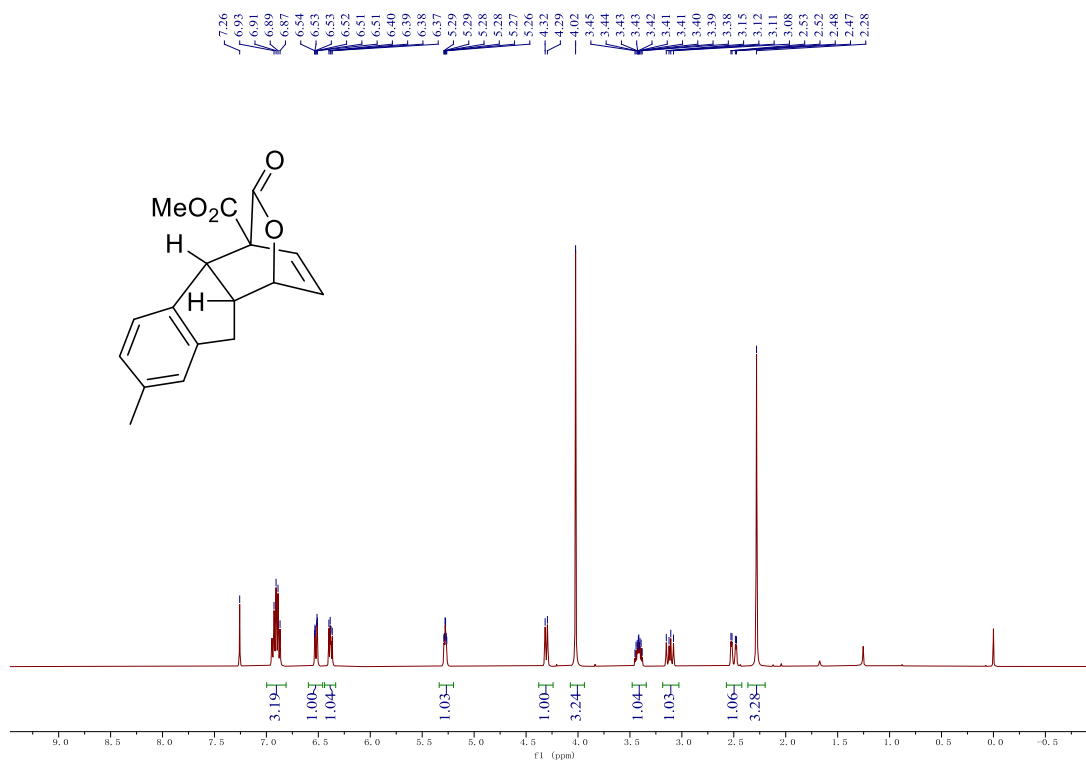

**<sup>1</sup>H NMR of Compound 3j**

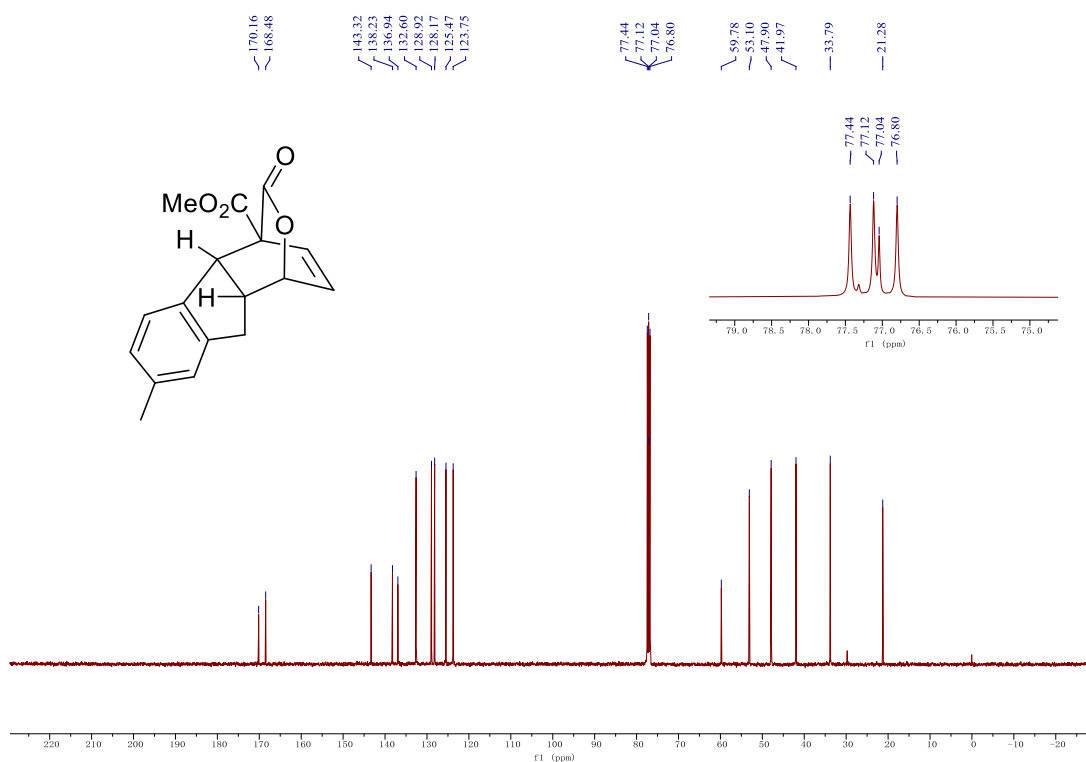

**<sup>13</sup>C NMR of Compound 3j**

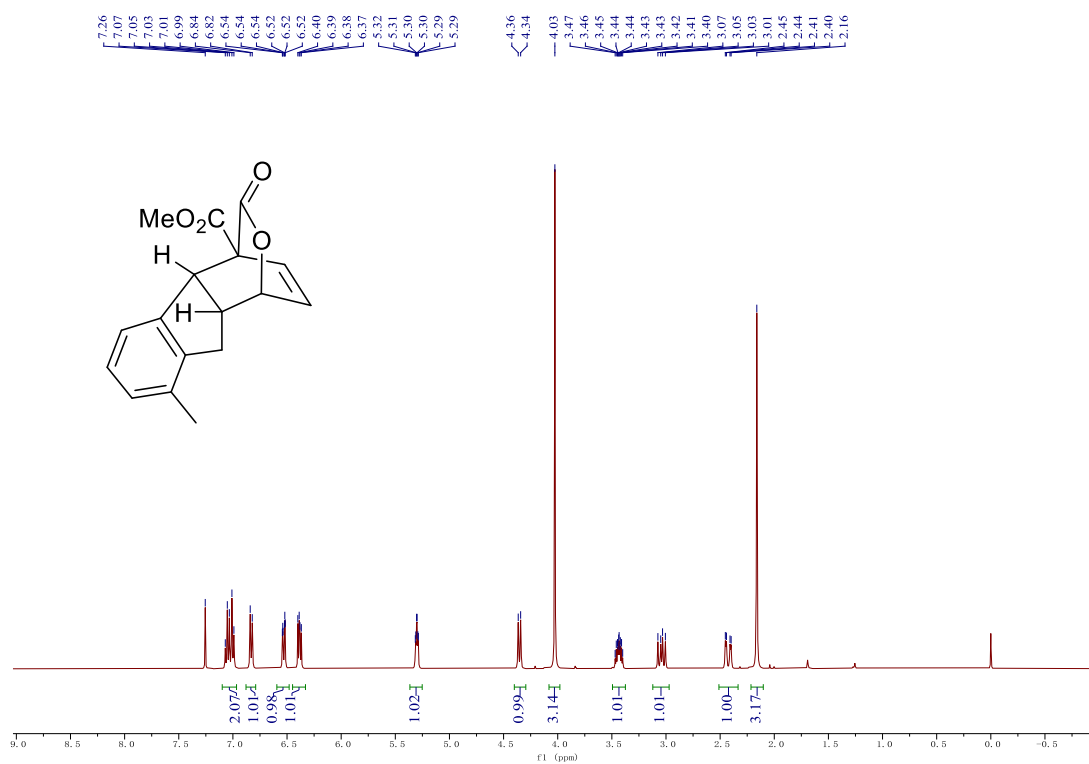

**<sup>1</sup>H NMR of Compound 3k**

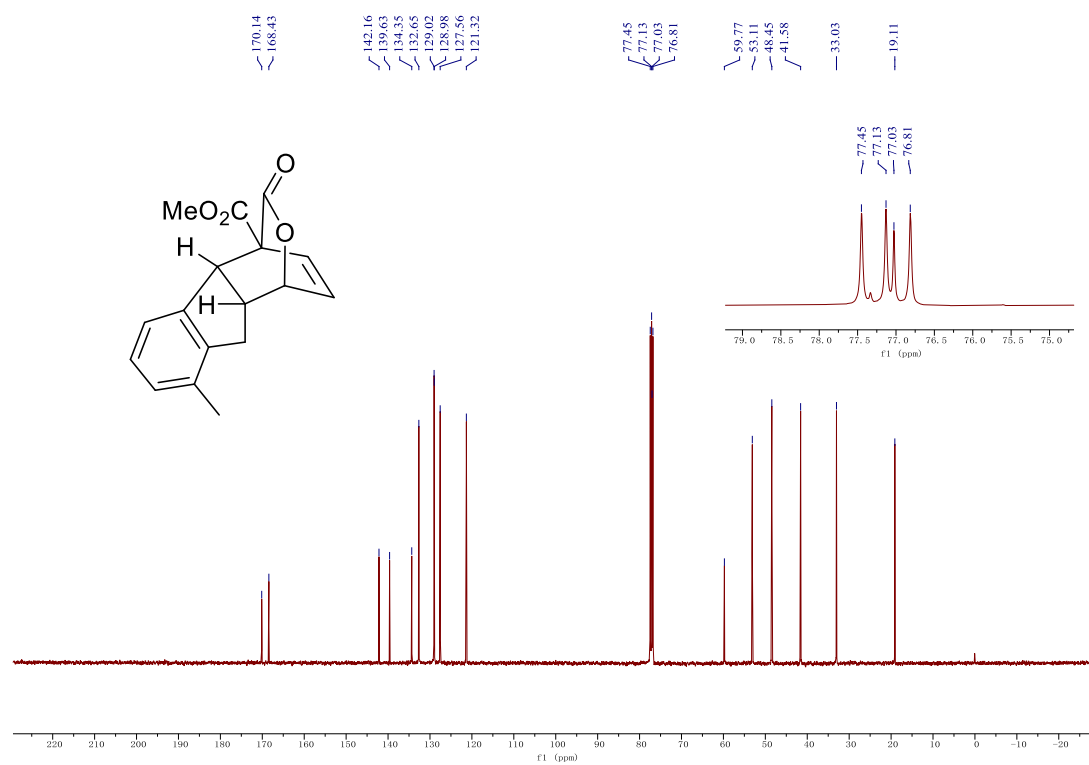

**<sup>13</sup>C NMR of Compound 3k**

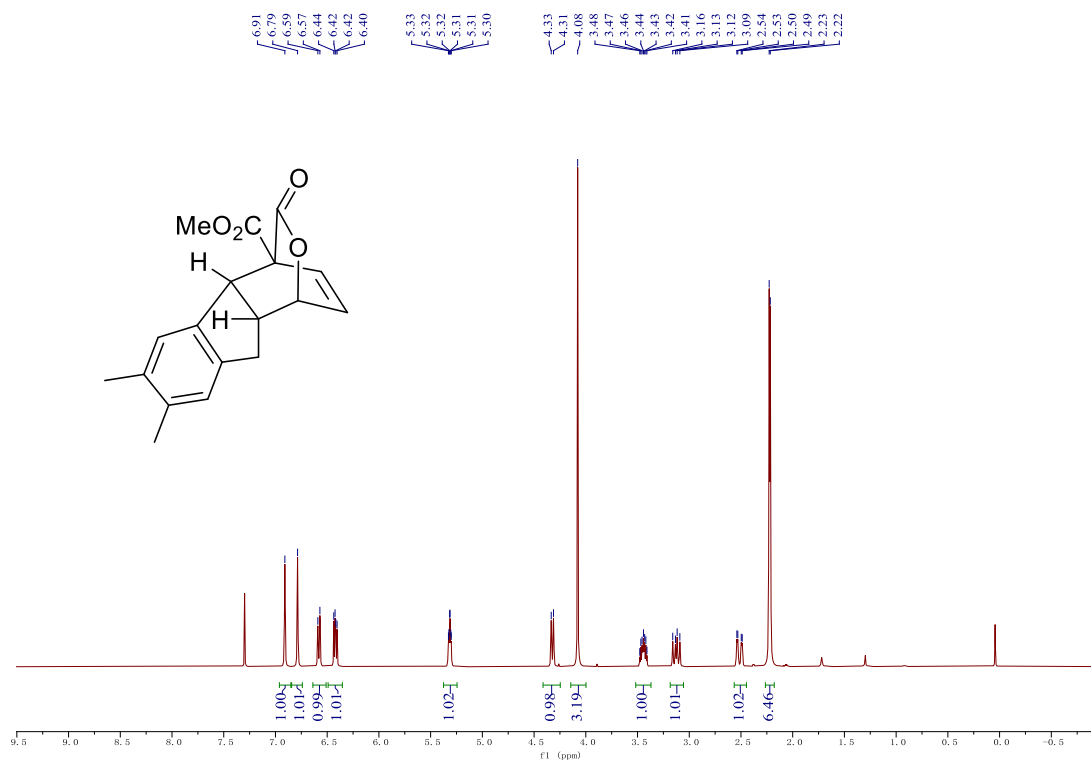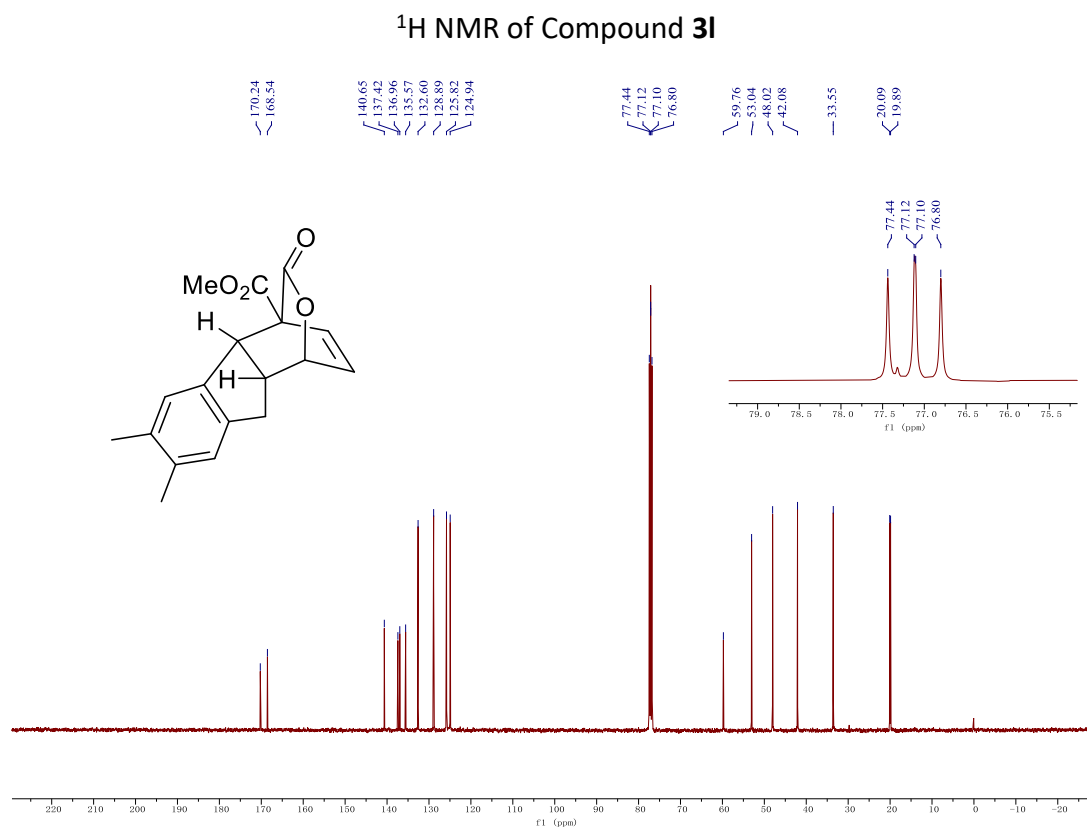

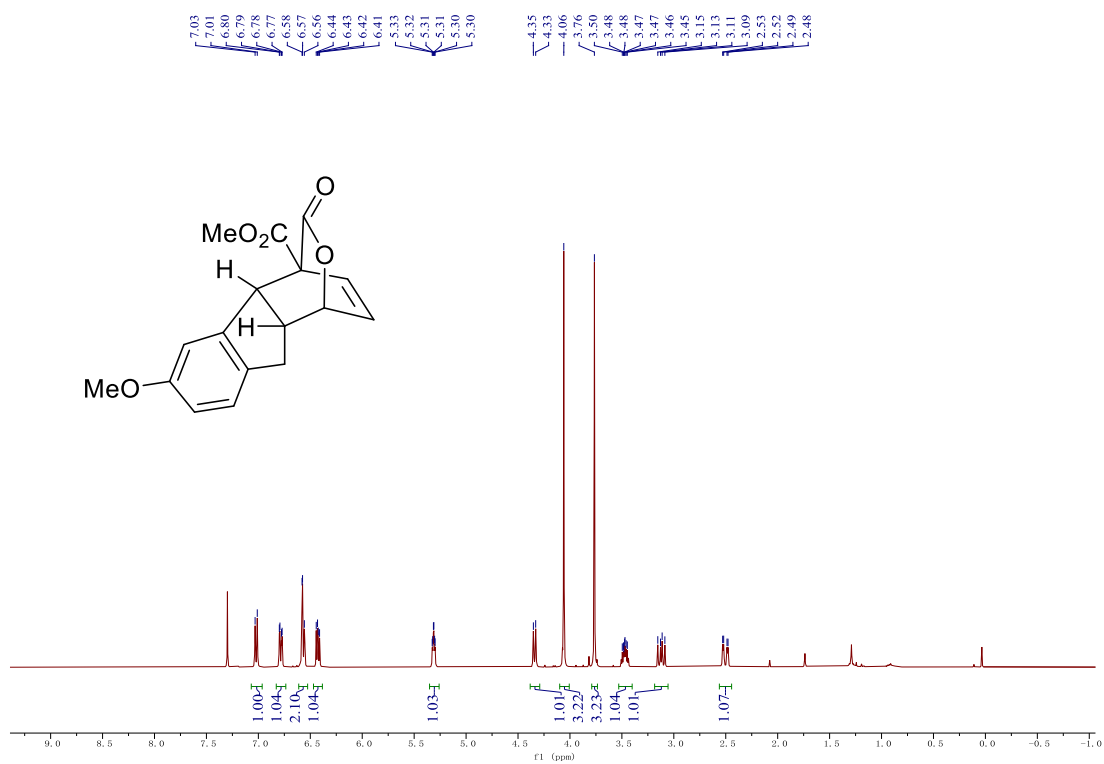

**<sup>1</sup>H NMR of Compound 3m**

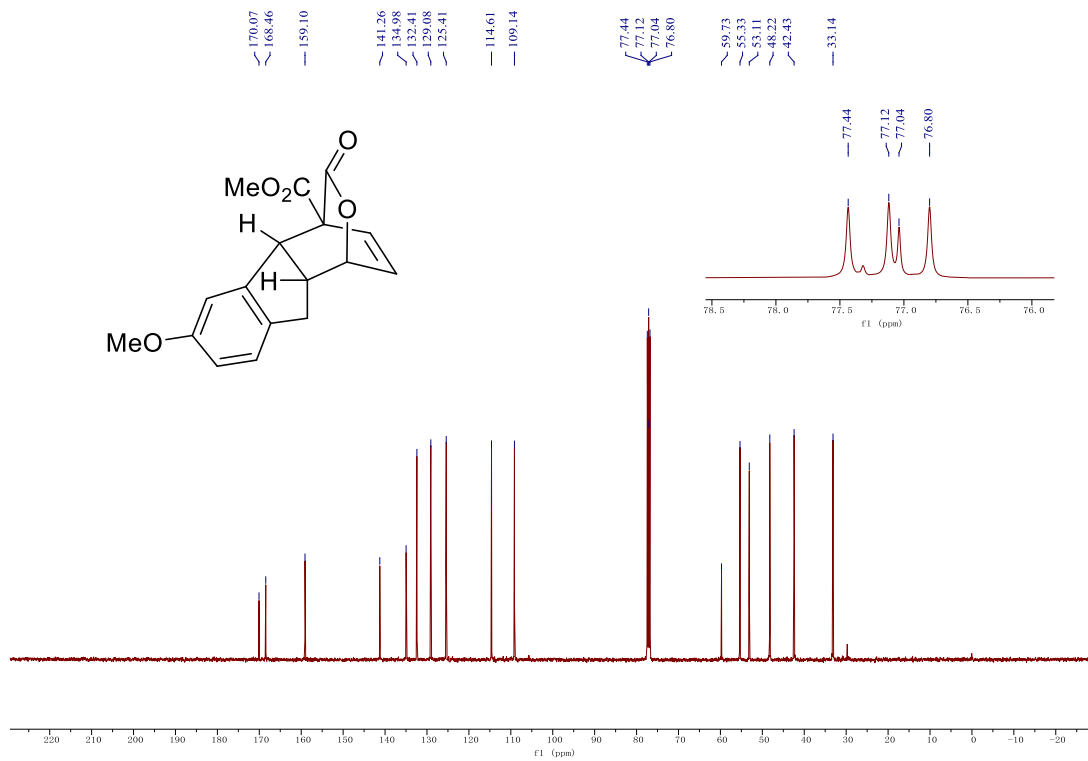

**<sup>13</sup>C NMR of Compound 3m**

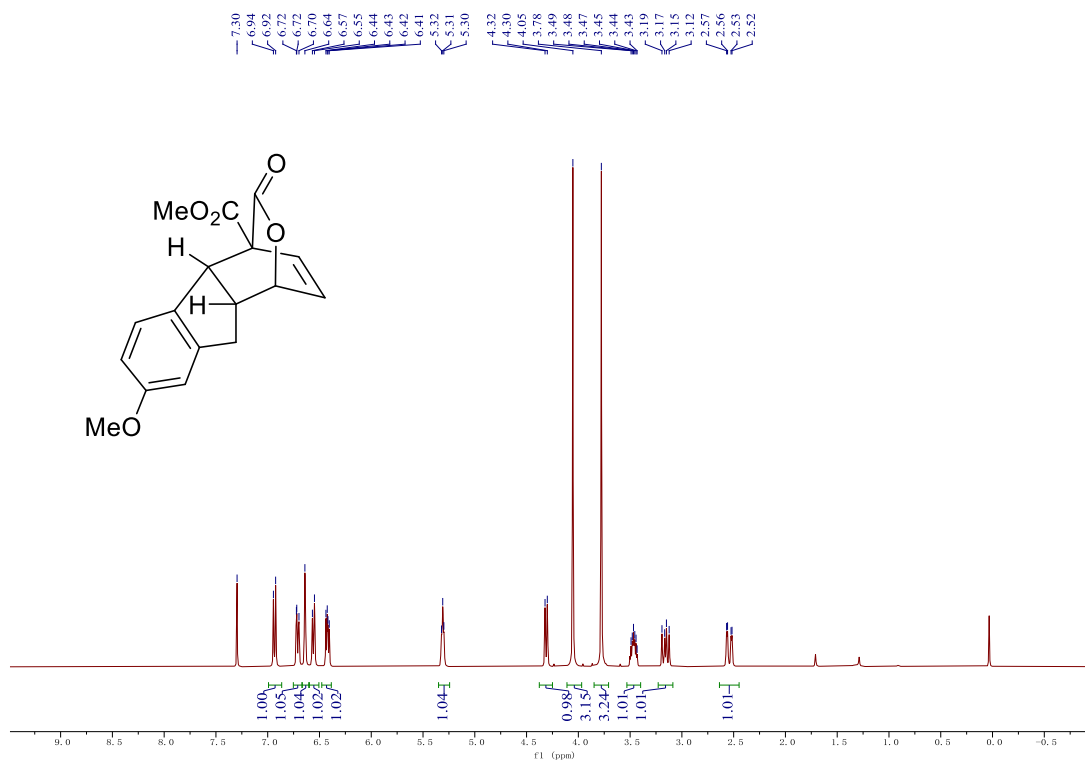

**<sup>1</sup>H NMR of Compound 3n**

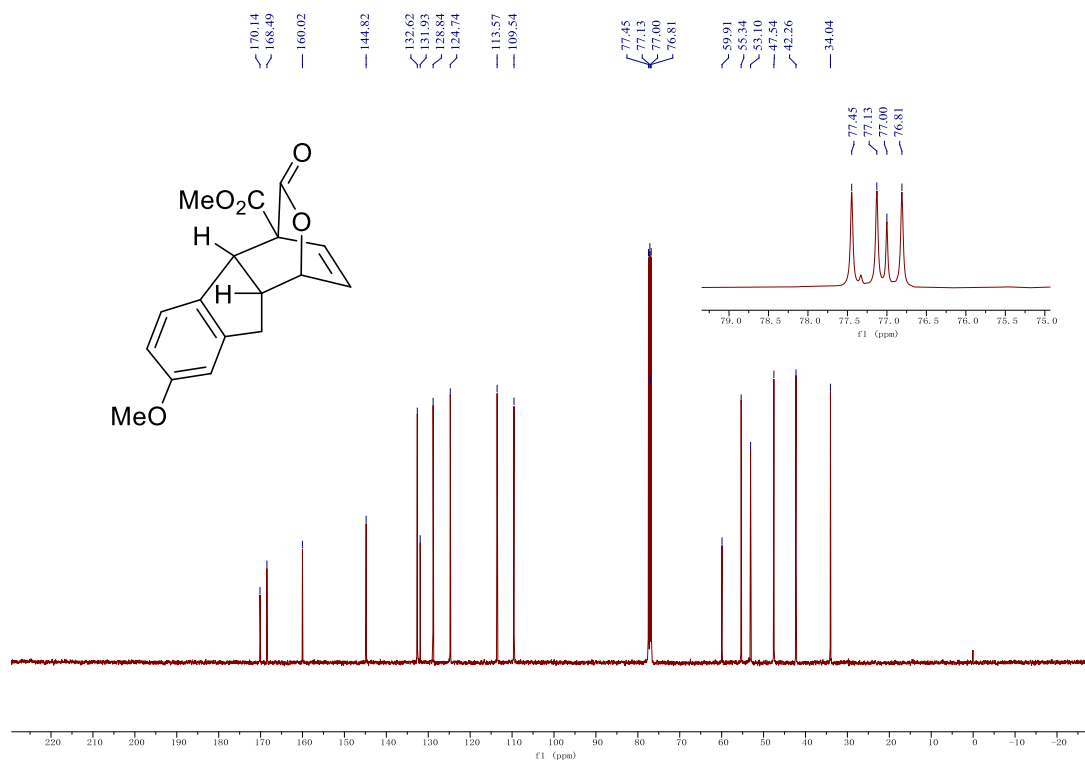

**<sup>13</sup>C NMR of Compound 3n**

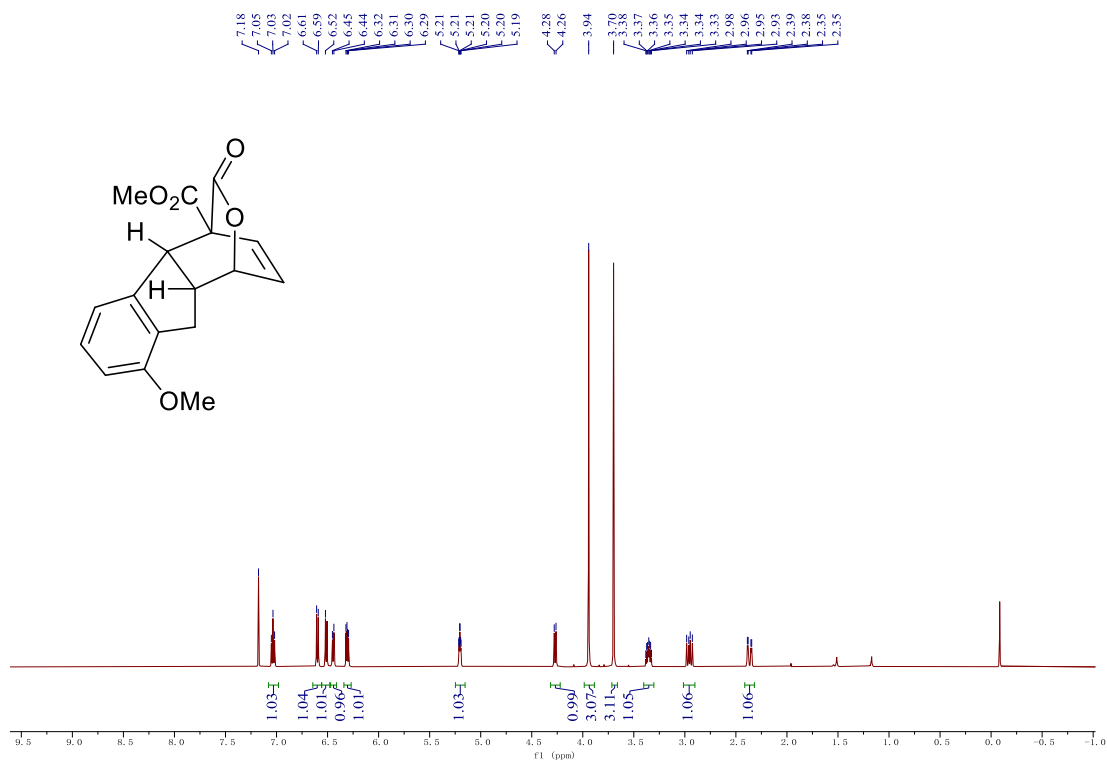

**<sup>1</sup>H NMR of Compound **3o****

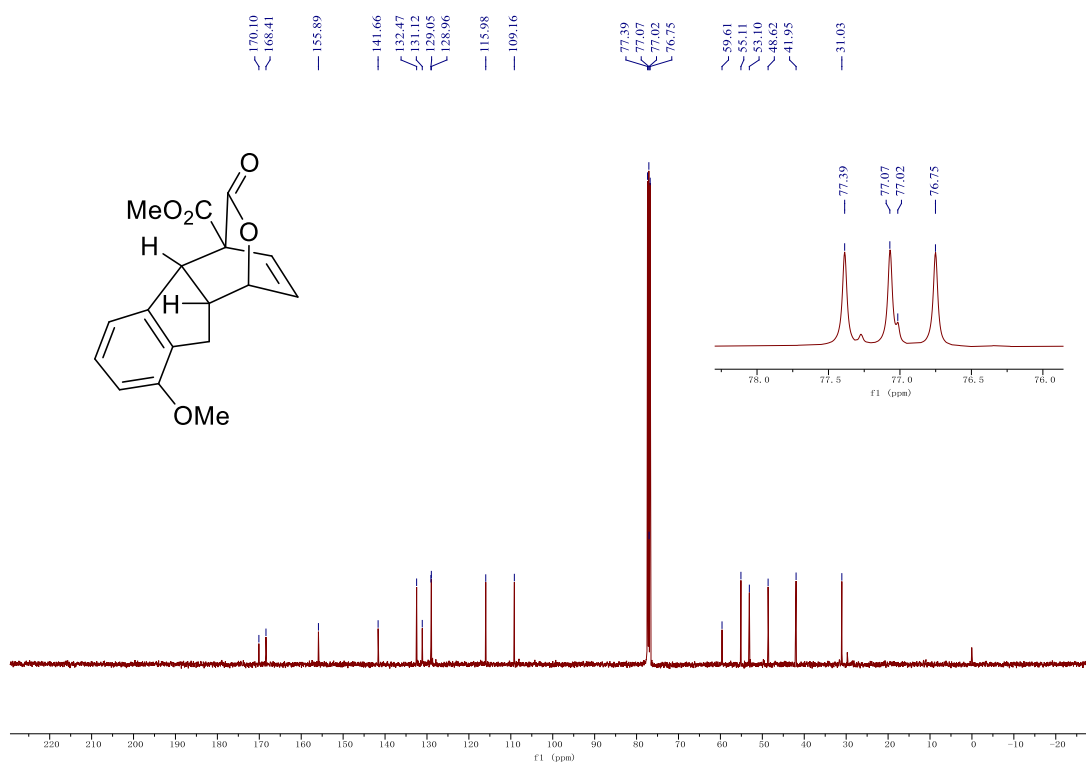

**<sup>13</sup>C NMR of Compound **3o****

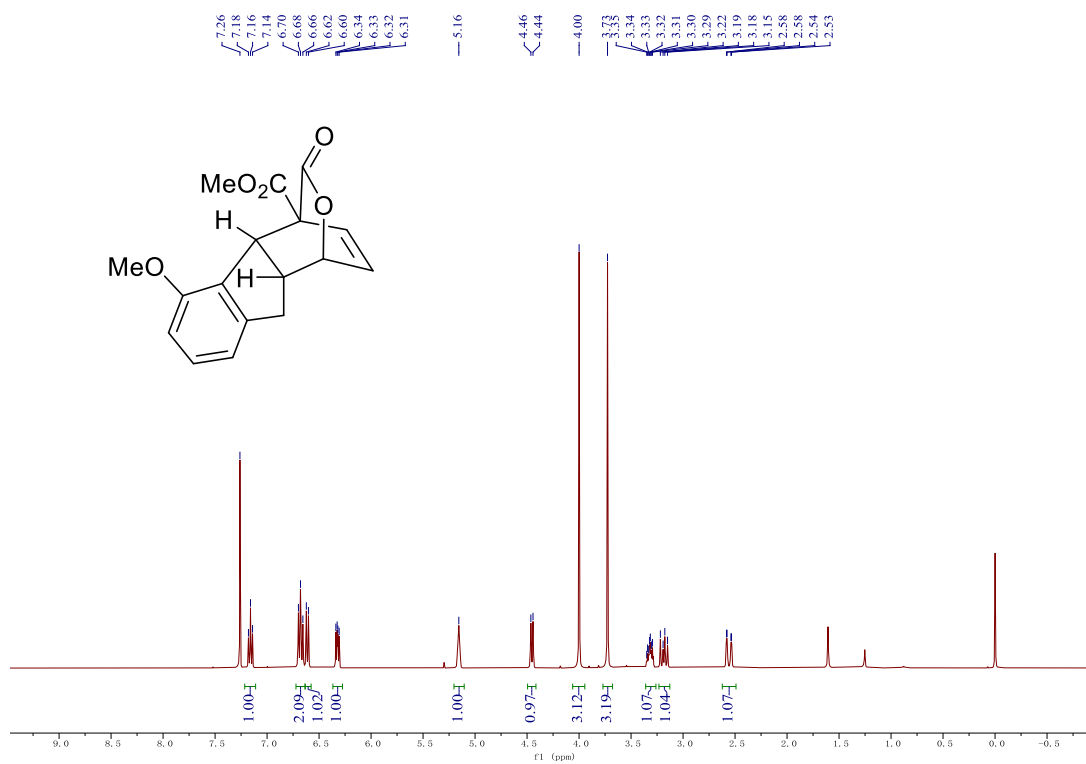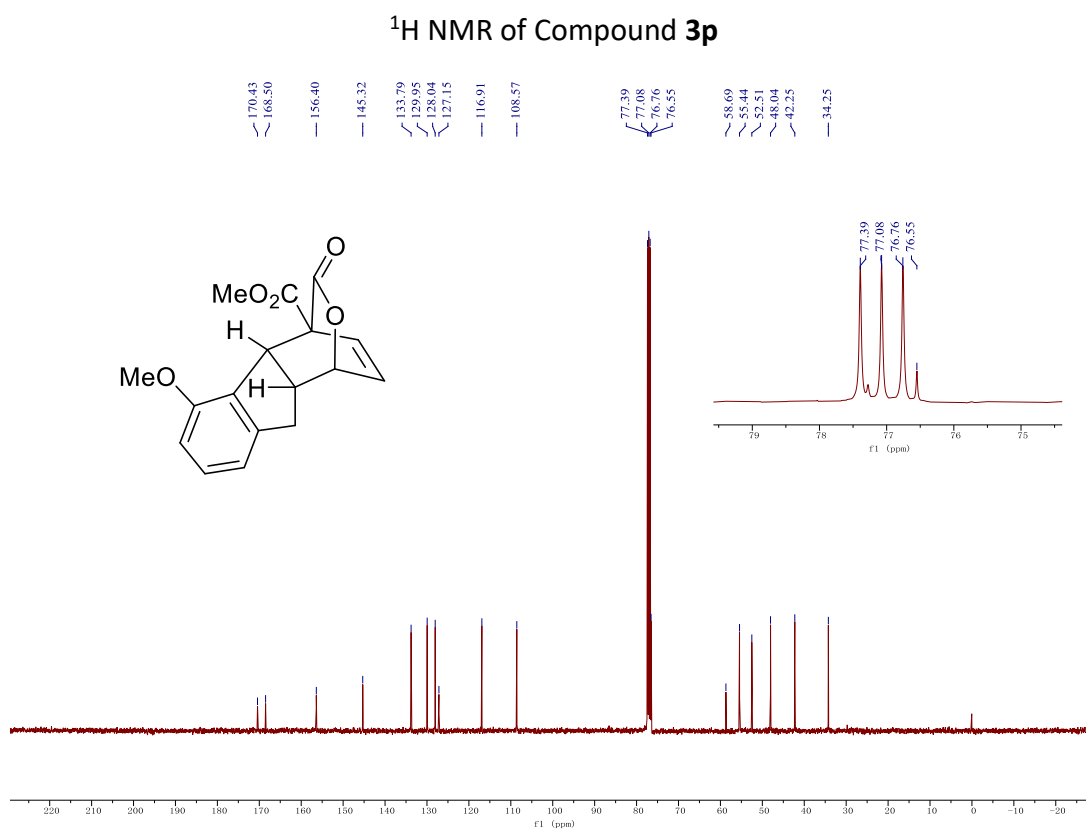



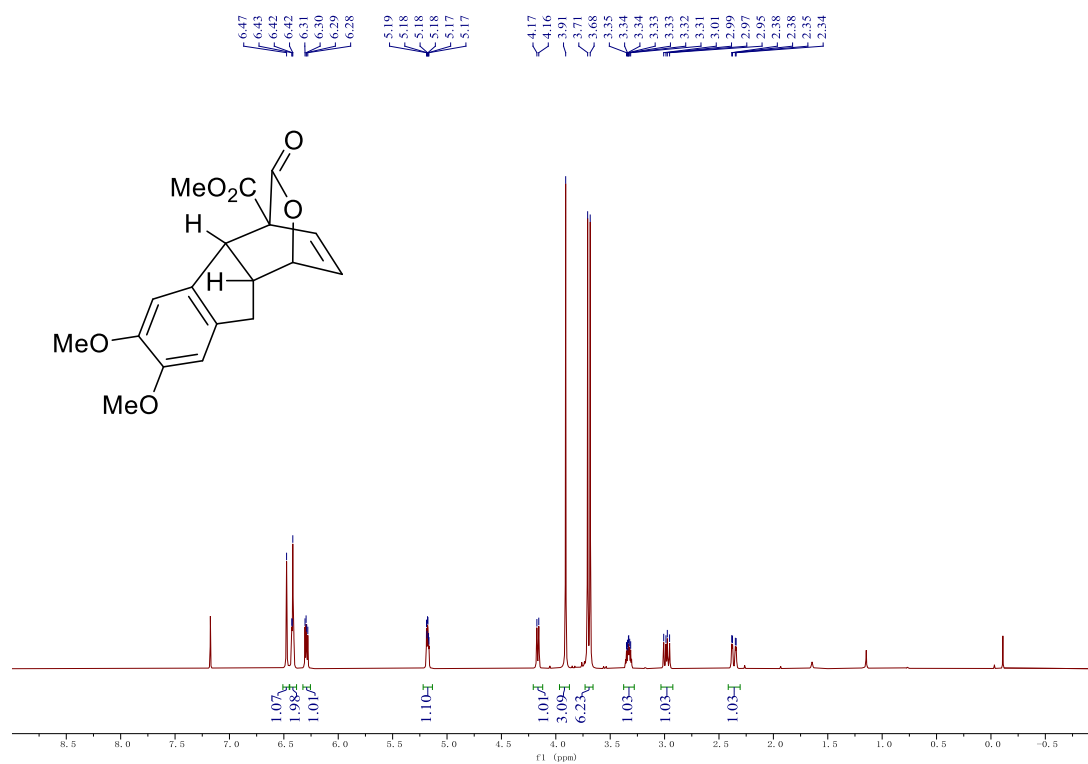

**<sup>1</sup>H NMR of Compound 3q**

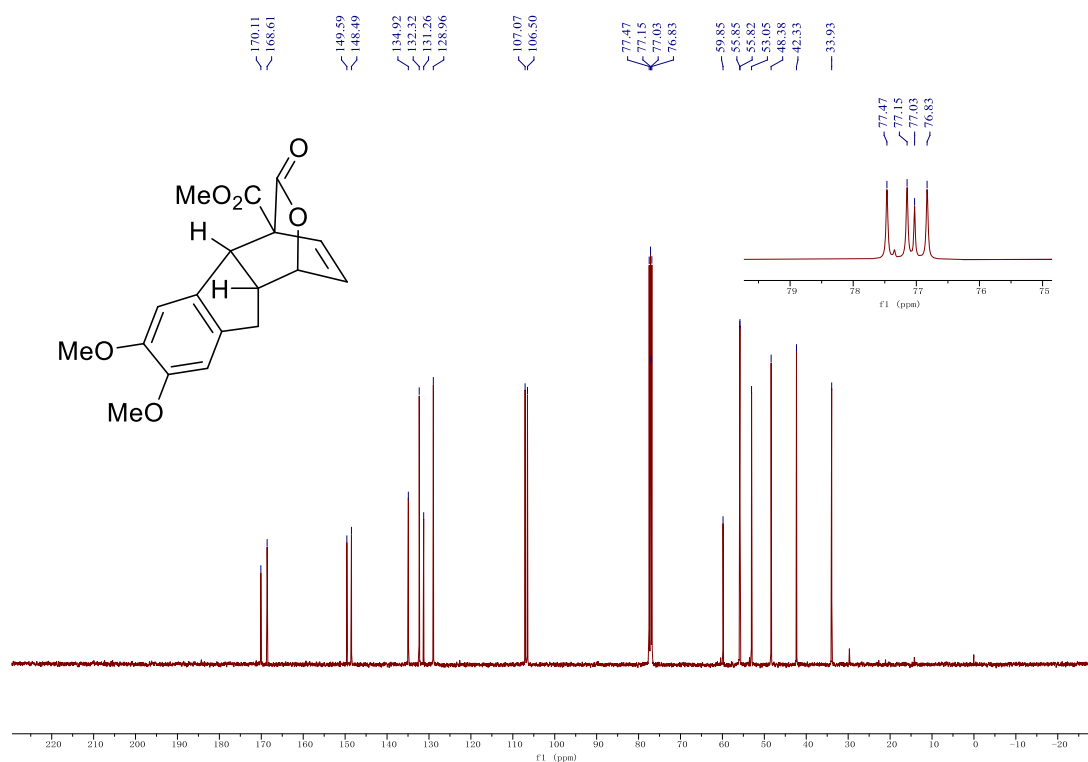

**<sup>13</sup>C NMR of Compound 3q**

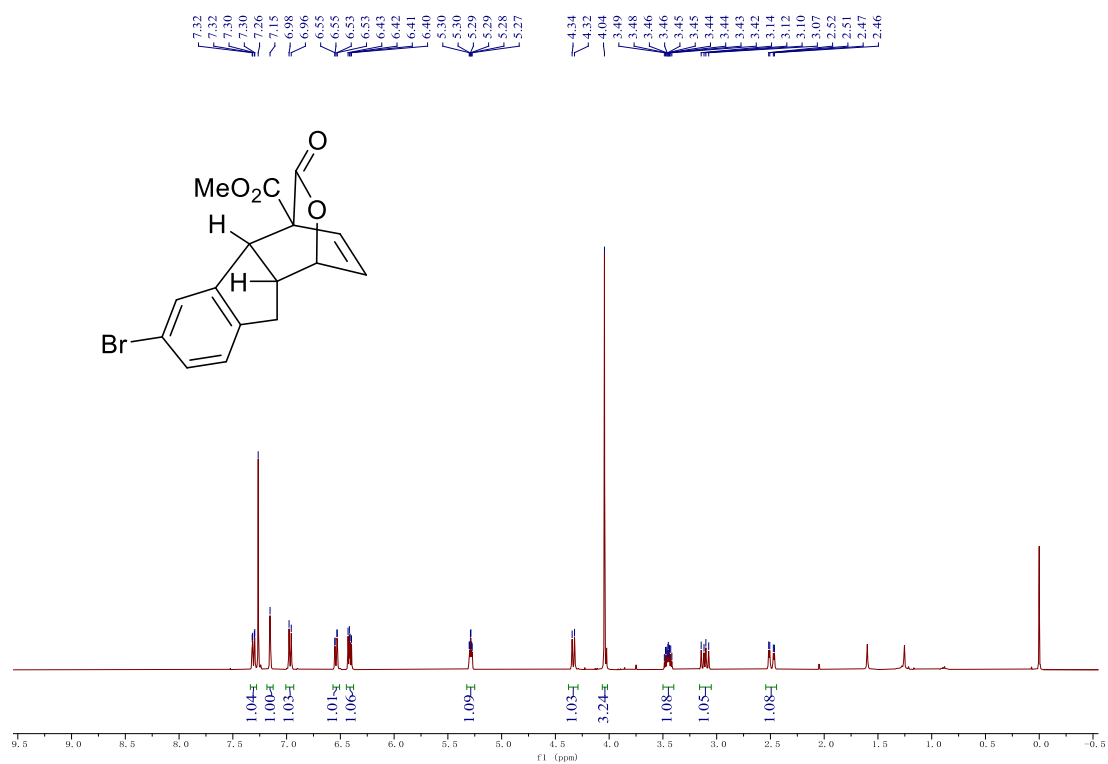

**<sup>1</sup>H NMR of Compound 3r**

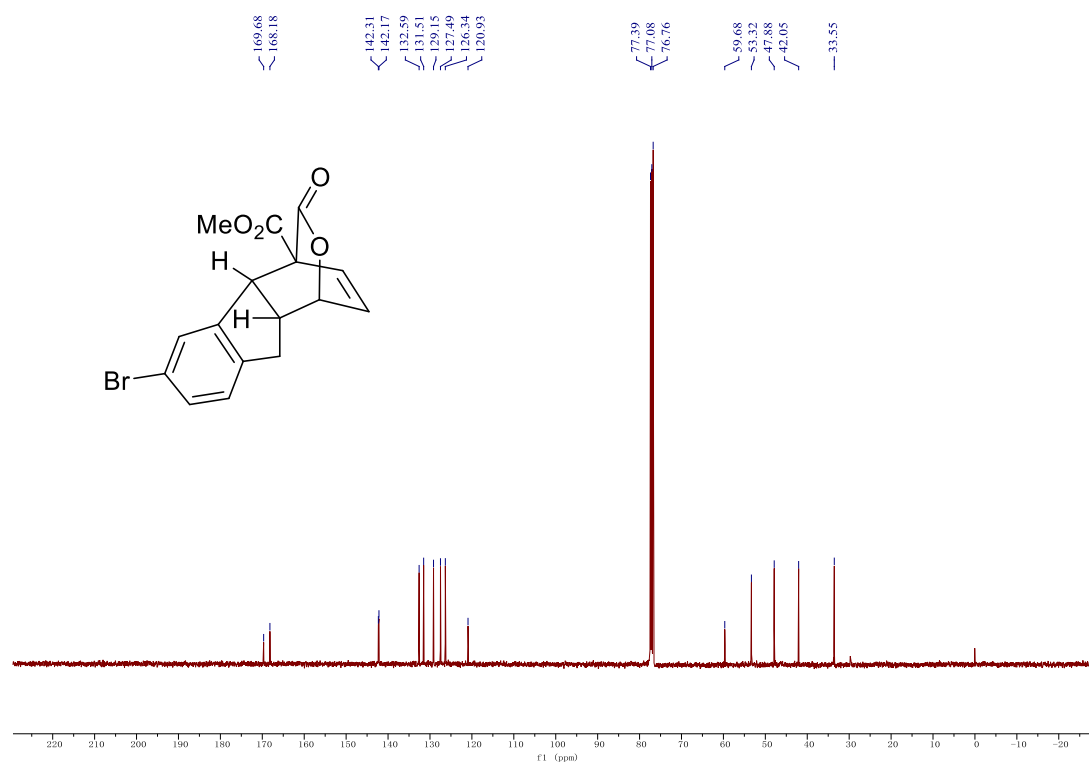

**<sup>13</sup>C NMR of Compound 3r**

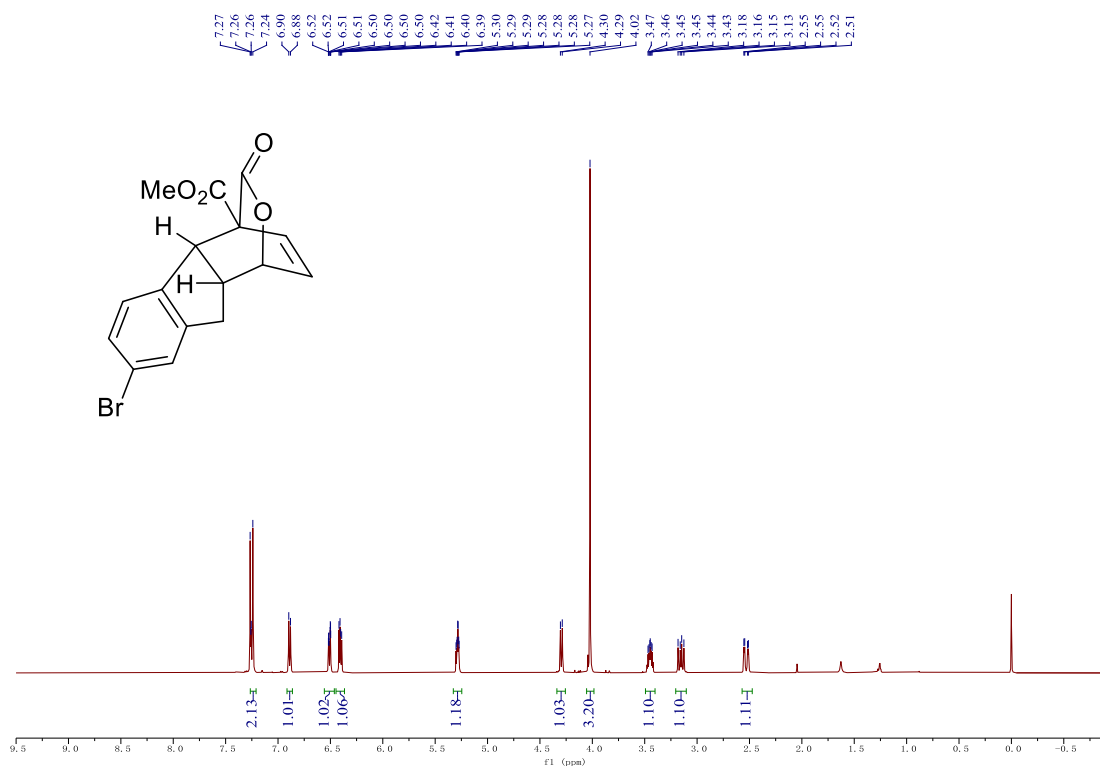

**<sup>1</sup>H NMR of Compound 3s**

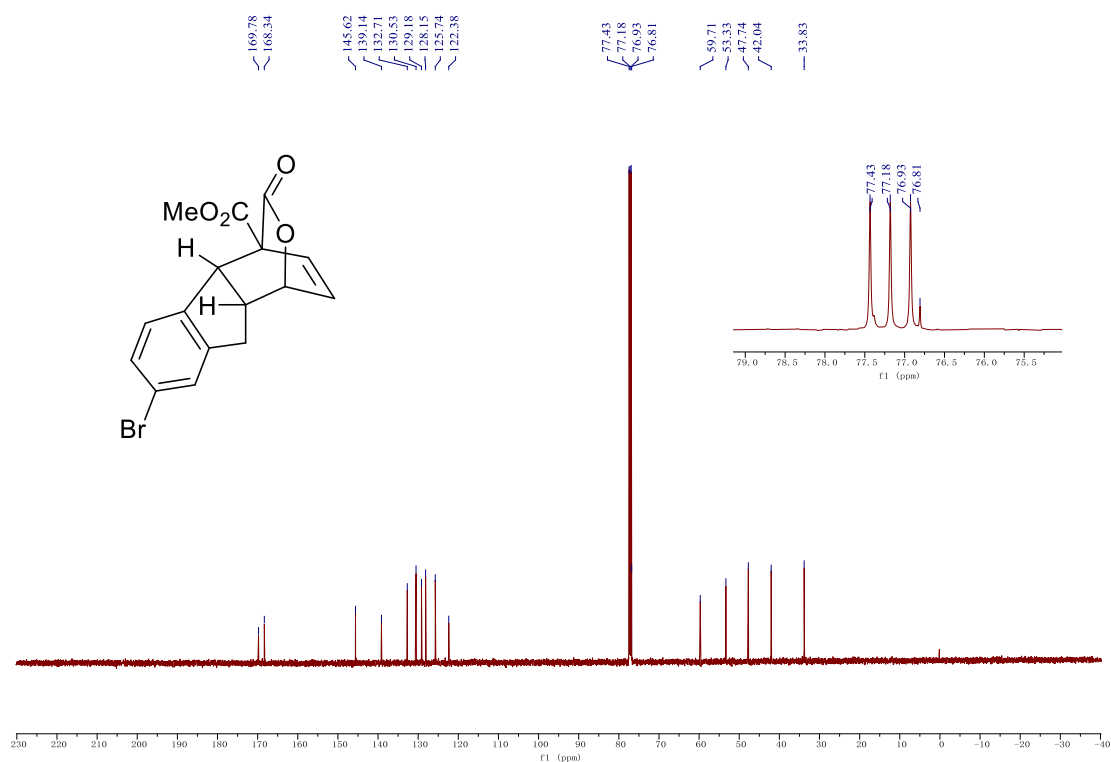

**<sup>13</sup>C NMR of Compound 3s**

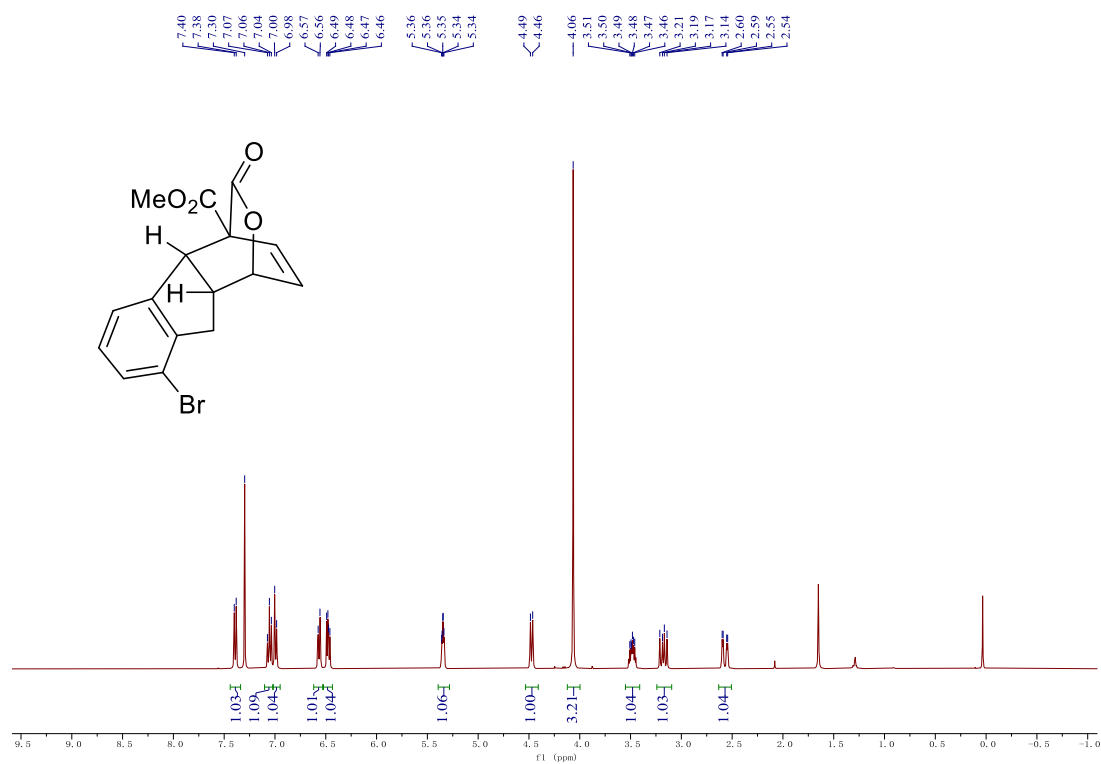

**<sup>1</sup>H NMR of Compound 3t**

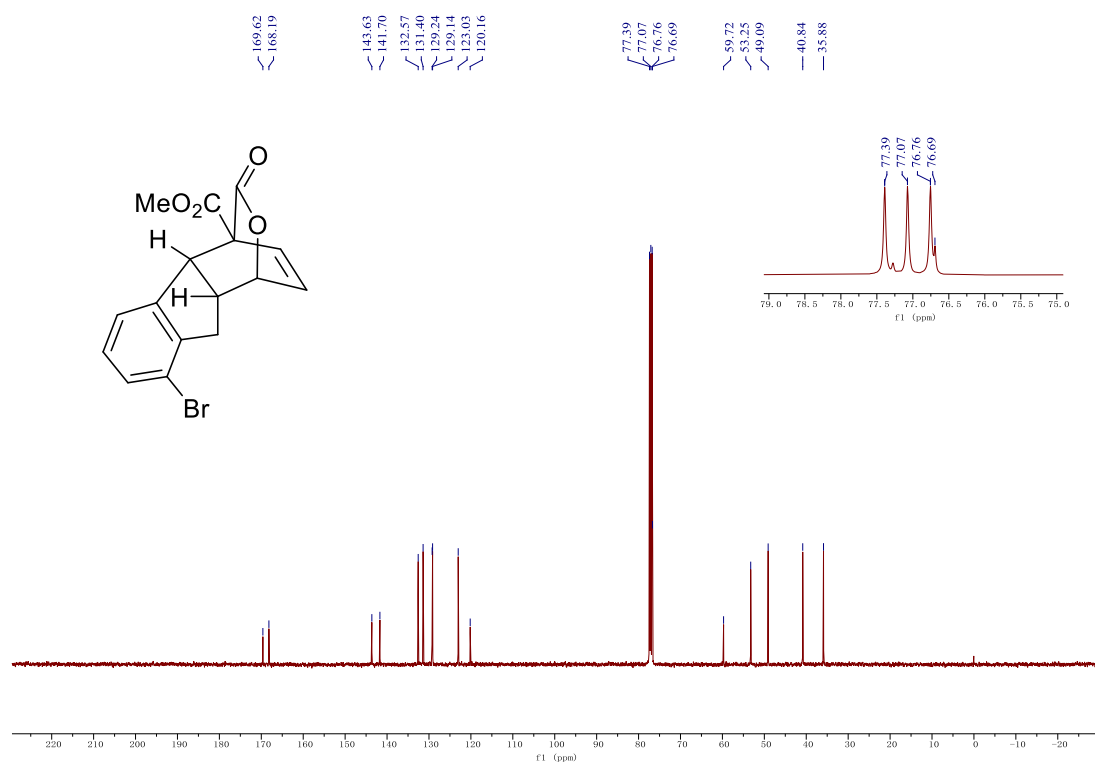

**<sup>13</sup>C NMR of Compound 3t**

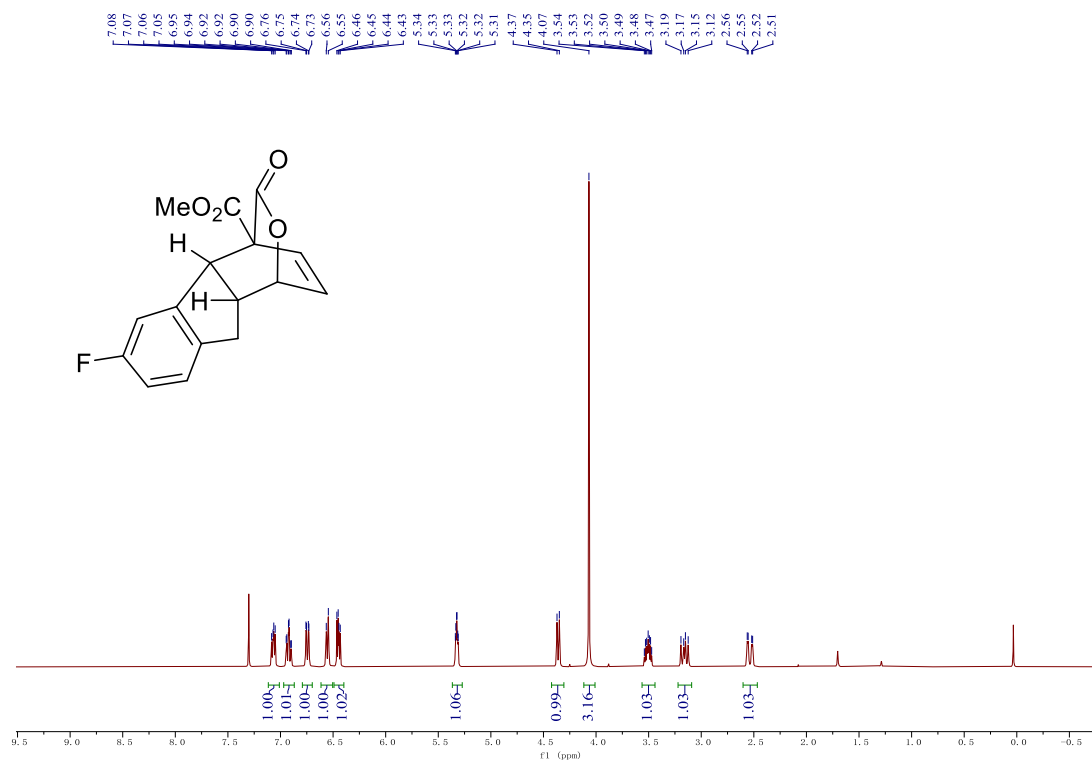

**<sup>1</sup>H NMR of Compound 3u**

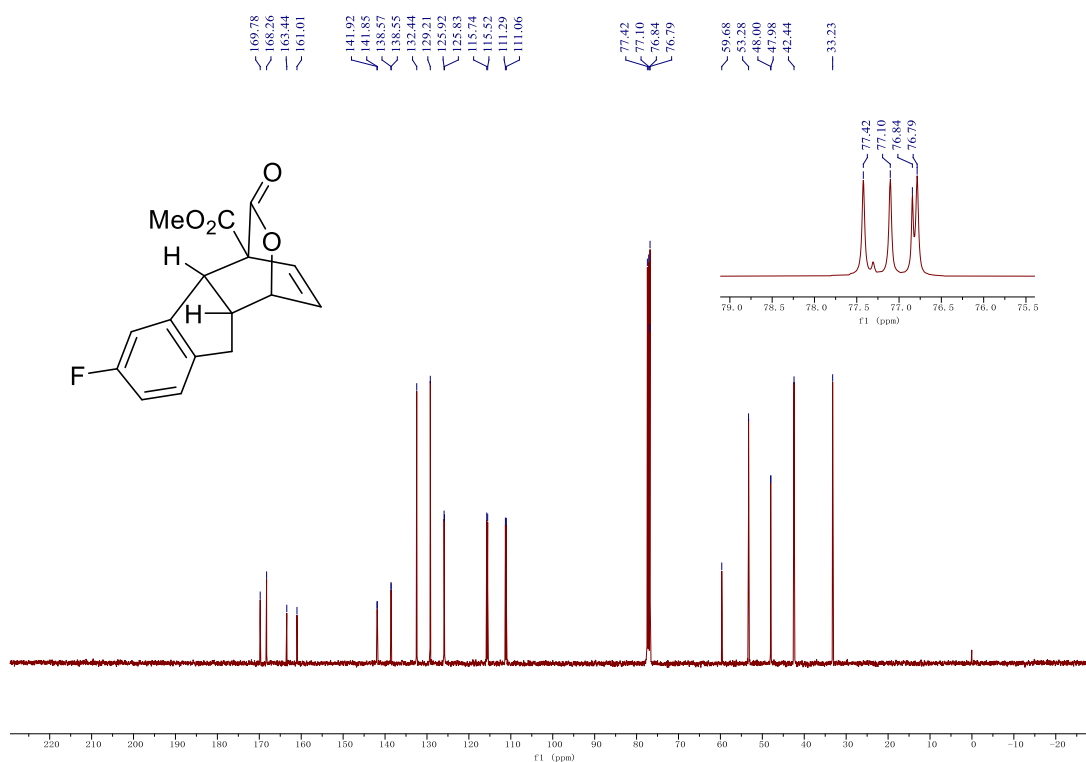

**<sup>13</sup>C NMR of Compound 3u**

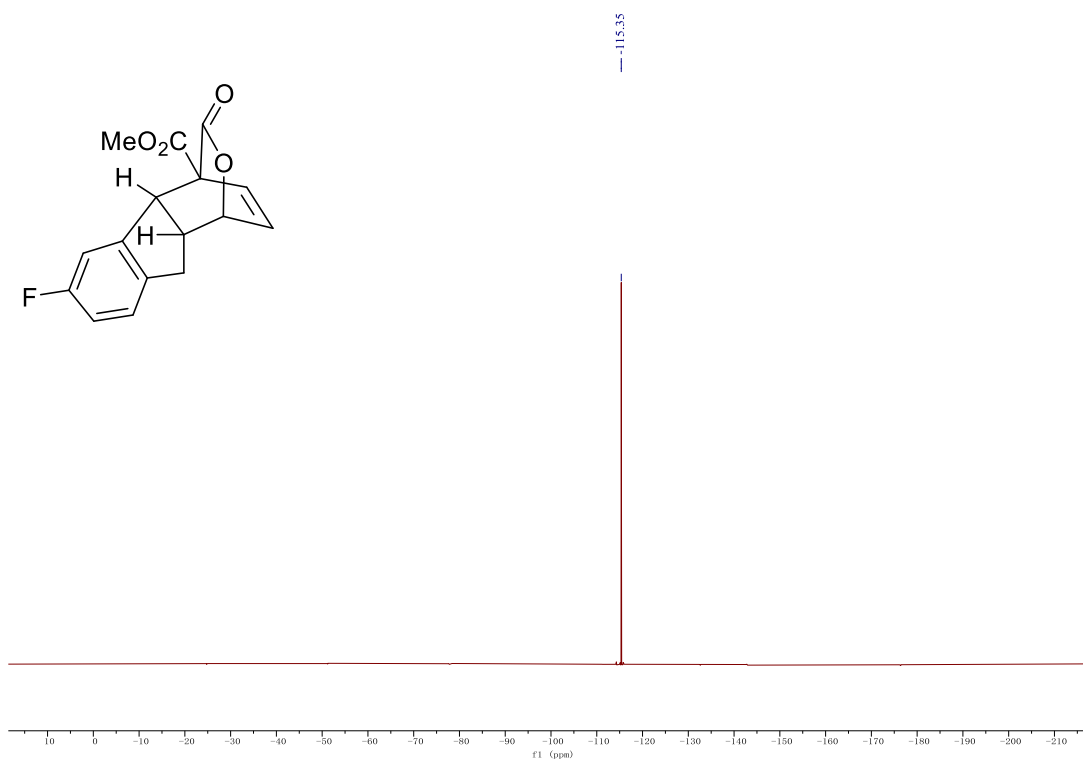

$^{19}\text{F}$  NMR of Compound **3u**

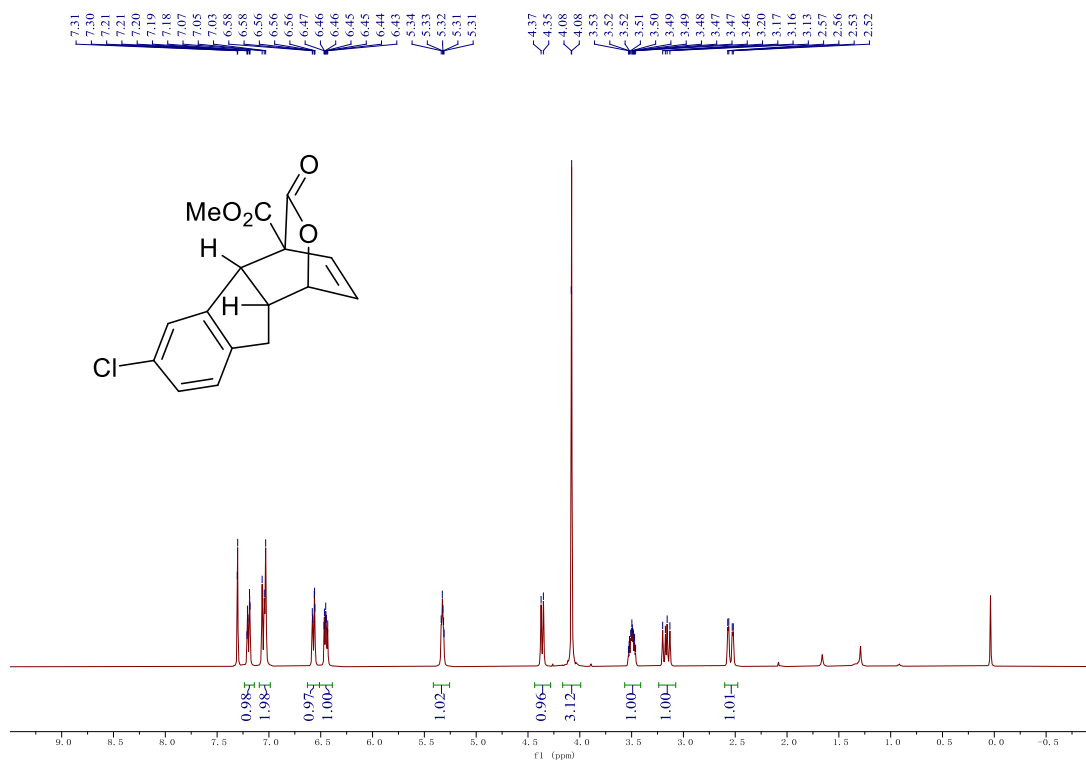

**<sup>1</sup>H NMR of Compound 3v**

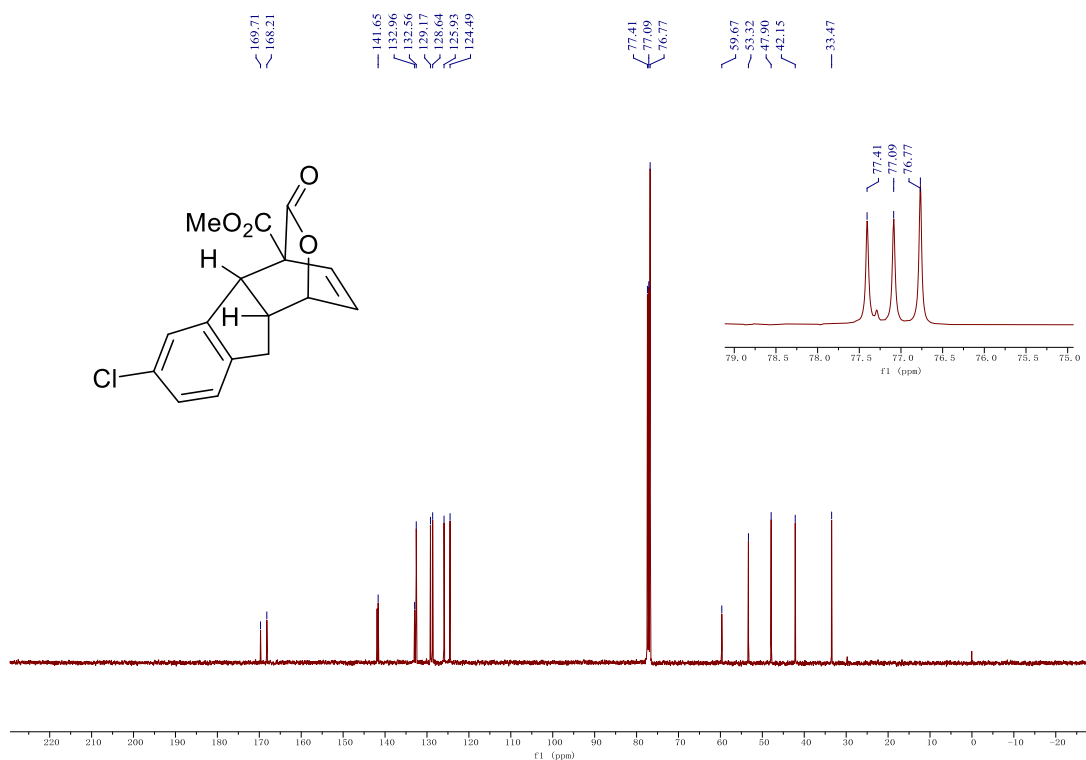

**<sup>13</sup>C NMR of Compound 3v**

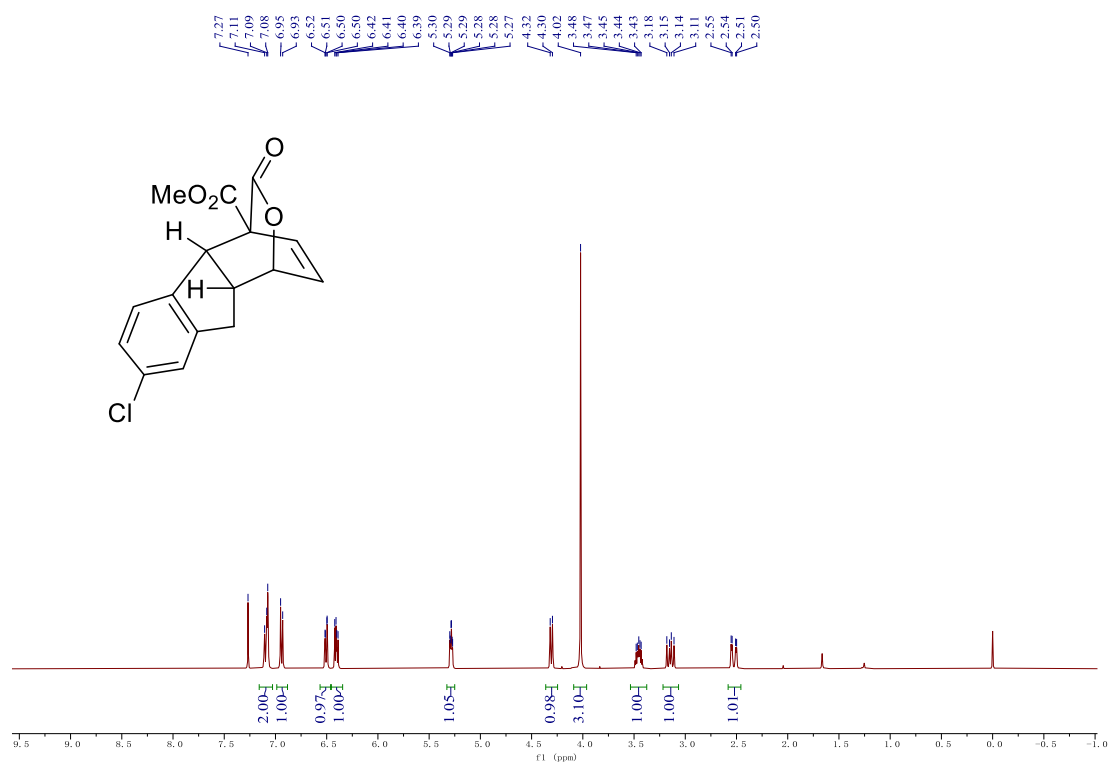

**<sup>1</sup>H NMR of Compound 3w**

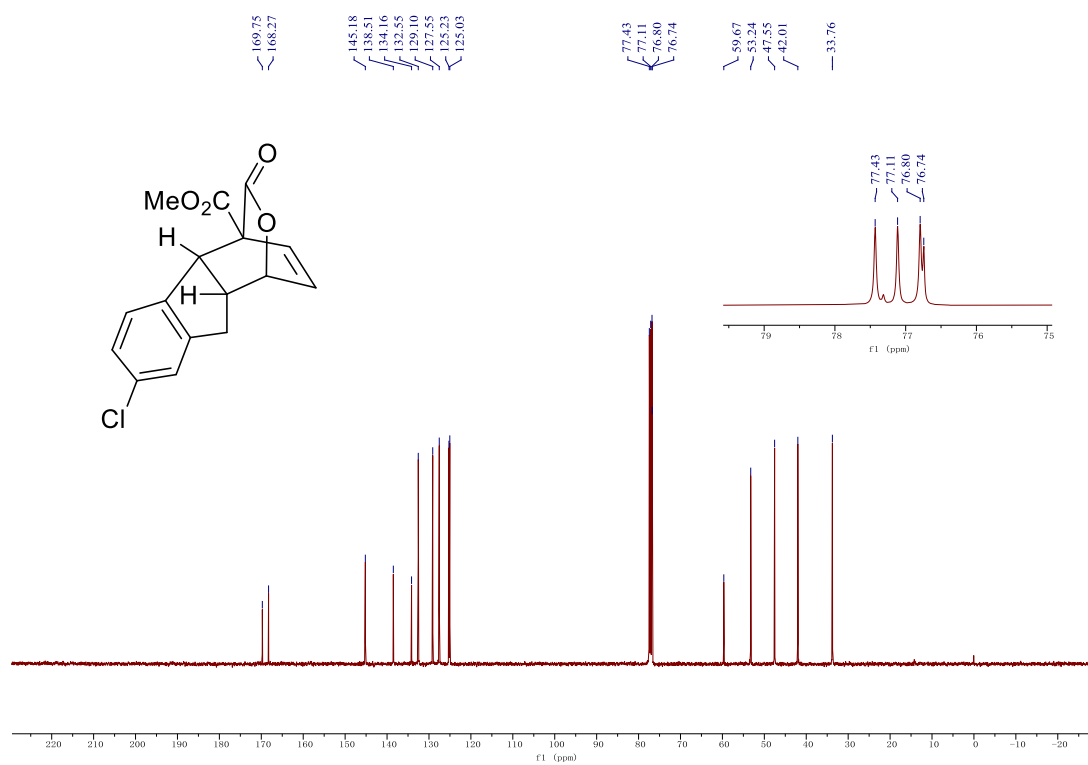

**<sup>13</sup>C NMR of Compound 3w**
